# Supplementary material for: Visible-light-promoted radical cascade alkylation/cyclization: access to alkylated indolo/benzoimidazo[2,1-a]isoquinolin-6(5H)-ones
Source: Royal Society of Chemistry journal article supplement (doi:10.1039/d2ob01732f), 2022-01-01

# Supporting Information

## Visible-light-mediated Radical Cascade Alkylation/Cyclization: Access to alkylated Indolo/Benzoimidazo[2,1-*a*]isoquinolin-6(5*H*)-ones

Wen-Qin Yu, Bi-Quan Xiong, Long-Jin Zhong,\* Yu Liu\*

<sup>a</sup> Department of Chemistry and Chemical Engineering, Hunan Institute of Science and Technology, Yueyang 414006, China

lyxtmj\_613@163.com (Yu Liu) and zlj1511@hnu.edu.cn (Long-Jin Zhong)

### List of Contents

|                                                              |                |
|--------------------------------------------------------------|----------------|
| <b>1. General Information</b>                                | <b>S1</b>      |
| <b>2. Experimental Section</b>                               | <b>S1-S7</b>   |
| <b>2.1 General Procedure for the Synthesis of substrates</b> | <b>S1</b>      |
| <b>2.2 Typical Experimental Procedure</b>                    | <b>S1-S2</b>   |
| <b>2.3 The Light on/off Experiments</b>                      | <b>S2</b>      |
| <b>2.4 Details of Visible-Light Source</b>                   | <b>S3</b>      |
| <b>2.5 Control Experiments</b>                               | <b>S3-S8</b>   |
| <b>3. Reference</b>                                          | <b>S8</b>      |
| <b>4. <sup>1</sup>H and <sup>13</sup>C spectra</b>           | <b>S9-S121</b> |

## 1. General Information

Unless otherwise stated, all commercial reagents were used as received. Propiophenone, aldehydes (Innochem, >98%), *o*-Phenylenediamine and Phenylhydrazine hydrochloride were used without further treatment. All reagents and solvents were commercially available and used without any further purification unless specified. All solvents were dried and distilled according to standard procedures. Flash column chromatography was performed using silica gel (0.25mm, 300-400 mesh). Analytical thin-layer chromatography was performed using glass plates pre-coated with 0.25mm 300-400 mesh silica gel impregnated with a fluorescent indicator (254 nm). All reactions were carried out with magnetic stirring and in dried glassware. Nuclear magnetic resonance (NMR) spectra are recorded in parts per million from internal tetramethylsilane on the  $\delta$  scale.  $^1\text{H}$  NMR,  $^{19}\text{F}$  NMR and  $^{13}\text{C}$  NMR spectra were recorded in  $\text{CDCl}_3$  on a Bruker DRX-400 spectrometer operating at 400 MHz, 376 MHz and 100 MHz, respectively. All chemical shift values are quoted in ppm and coupling constants quoted in Hz. The solvent peak was used as a reference value, for  $^1\text{H}$  NMR: TMS = 0.00 ppm, for  $^{13}\text{C}$  NMR:  $\text{CDCl}_3$  = 77.00 ppm. The following abbreviations were used to explain multiplicities: s = singlet, d = doublet, dd = doublet of doublet, t = triplet, td = triplet of doublet, q = quartet, m = multiplet, and br = broad. High-resolution mass spectra (HRMS) were obtained on an Agilent mass spectrometer using ESI-TOF (electrospray ionization-time of flight).

## 2. Experiment Section

### 2.1 General Procedure for the Synthesis of Substrates

All 2-aryl indoles **1**<sup>[1]</sup> and 4-alkylated Hantzsch esters **2**<sup>[2-3]</sup> were synthesized according to the known methods.

### 2.2 Typical Experimental Procedure

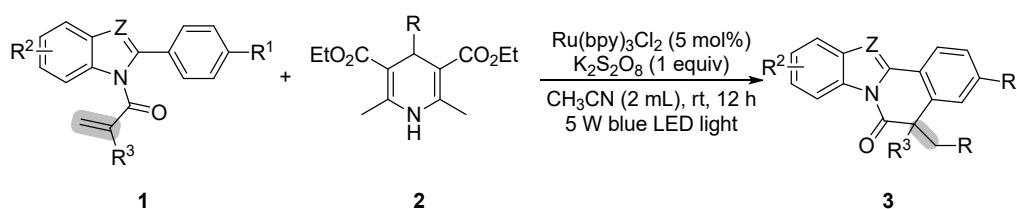

To a Schlenk tube were added 2-aryl indoles **1** (0.2 mmol), alkyl Hantzsch esters **2** (2 equiv, 0.4 mmol), Ru(bpy)<sub>2</sub>Cl<sub>2</sub> (5 mol%, 0.01 mmol), K<sub>2</sub>S<sub>2</sub>O<sub>8</sub> (1 equiv, 0.2 mmol) and CH<sub>3</sub>CN (2 mL). Then the tube was stirred at room temperature in Ar atmosphere for the indicated time until complete consumption of starting material as monitored by TLC analysis. The residue was purified by silica gel flash column chromatography (petroleum ether/ethyl acetate = 30 : 1) to afford the desired products **3**.

### 2.3 The Light on/off Experiments

Figure S1 The Light on/off Experiments

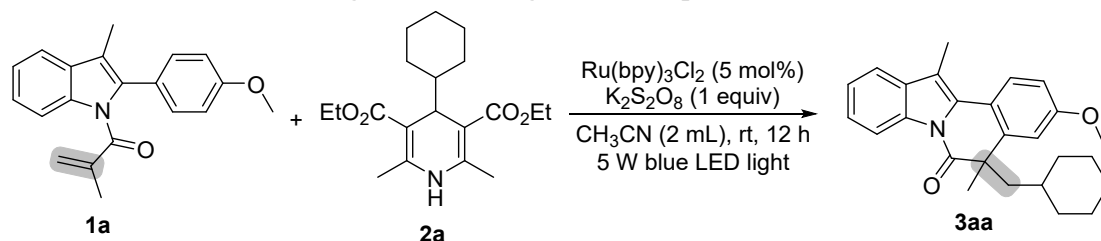

| Time/h  | 0 | 3 (blue) | 6 (dark) | 9 (blue) | 12 (dark) | 15 (blue) | 18 (dark) | 21 (blue) |
|---------|---|----------|----------|----------|-----------|-----------|-----------|-----------|
| Yield/% | 0 | 31.5     | 31.5     | 55.5     | 55.5      | 72.5      | 72.5      | 85.5      |

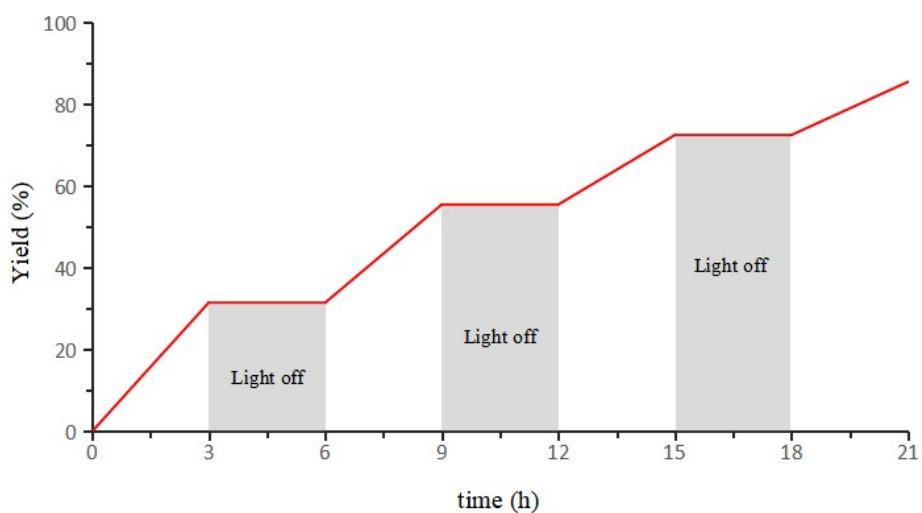

## 2.4 Details of Visible-Light Source

The light source bought from SANYI ([https://item.taobao.com/item.htm?spm=a1z09.2.0.0.42672e8dv2Chsz&id=35497290577&\\_u=j35sh1qt9325](https://item.taobao.com/item.htm?spm=a1z09.2.0.0.42672e8dv2Chsz&id=35497290577&_u=j35sh1qt9325)), 5 W blue LED light bulb (E27). The wavelength was about 460-470 nm and the wavelength of peak intensity was about 467.5 nm. The pictures of the visible-light source (Figure S1) was shown as follow:

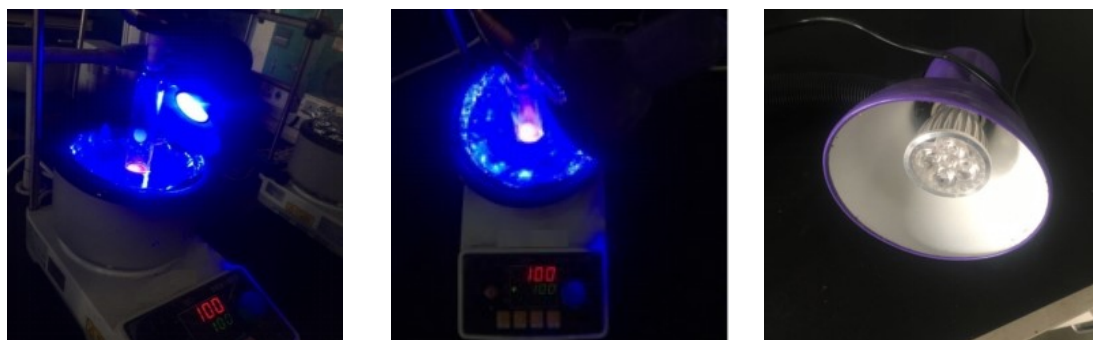

Figure S2. Pictures of Visible-Light Source. Reproduced from [Liu, Y.; Wang, Q.-L.; Chen, Z.; Zhou, Q.; Li, H.; Zhou, C.-S.; Xiong, B.-Q.; Zhang, P.-L.; and Tang, K.-W.; Visible-Light-Catalyzed C–C Bond Difunctionalization of Methylene cyclopropanes with Sulfonyl Chlorides for the Synthesis of 3-Sulfonyl-1,2-dihydronaphthalenes, *J. Org. Chem.* **2019**, *84*, 2829-2839]. Copyright [2019] American Chemical Society

## 2.5 Control Experiments

### 2.5.1 GC-MS Analysis of Raw Reaction Mixture by Using BHT as Radical Inhibitor

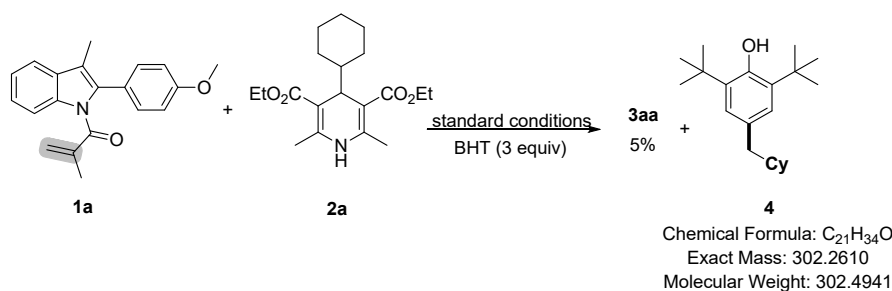

### Spectra of GC-MS

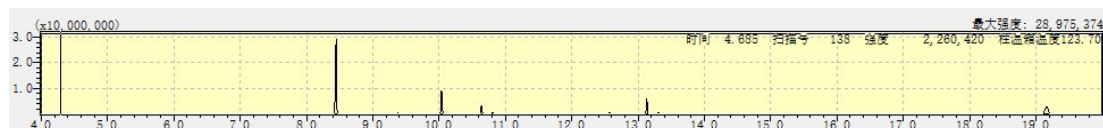

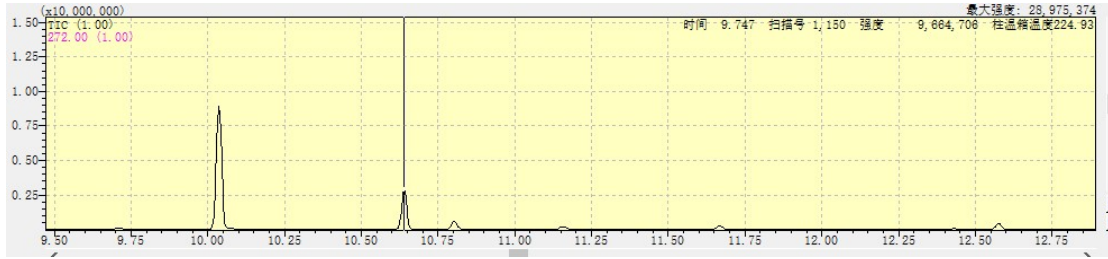

MS spectra of the peak at 10.640 min

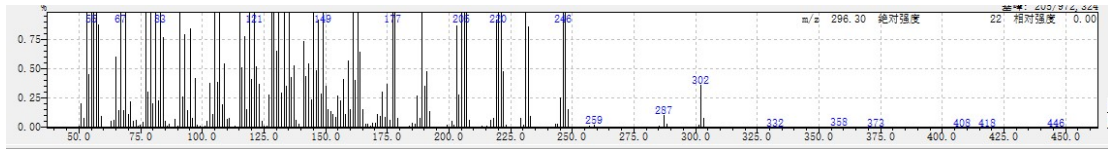

| [MS Spectrum]                 | 70.00  | 11050.11 | 101.00   | 202      | 0.02       |
|-------------------------------|--------|----------|----------|----------|------------|
| # of Peaks                    | 313    | 71.00    | 21650.22 | 102.05   | 568 0.06   |
| Raw Spectrum 10.640 (scan :   | 72.15  | 572      | 0.06     | 103.00   | 37230.38   |
| 1329)                         | 73.20  | 672      | 0.07     | 104.05   | 11000.11   |
| Background 10.605 (scan :     | 73.90  | 154      | 0.02     | 105.05   | 32846 3.38 |
| 1322)                         | 74.95  | 243      | 0.02     | 106.05   | 38340.39   |
| Base Peak m/z 205.15 (Inten : | 76.00  | 464      | 0.05     | 107.05   | 95420.98   |
| 972,324)                      | 77.00  | 12401    | 1.28     | 108.05   | 19530.20   |
| Event# 1                      | 78.00  | 29600.30 |          | 109.05   | 53030.55   |
| m/z Absolute Intensity        | 79.00  | 14787    | 1.52     | 110.10   | 730 0.08   |
| Relative Intensity            | 80.05  | 20170.21 |          | 111.10   | 809 0.08   |
| 50.00                         | 158    | 0.02     | 81.05    | 14494    | 1.49       |
| 51.00                         | 1995   | 0.21     | 82.15    | 22800.23 |            |
| 52.00                         | 849    | 0.09     | 83.05    | 105424   | 10.84      |
| 53.05                         | 11406  | 1.17     | 84.05    | 74990.77 |            |
| 54.05                         | 4421   | 0.45     | 85.20    | 555      | 0.06       |
| 55.05                         | 2476   | 12 25.47 | 85.80    | 150      | 0.02       |
| 56.05                         | 11913  | 1.23     | 86.75    | 322      | 0.03       |
| 57.05                         | 177837 | 18.29    | 87.80    | 39       | 0.00       |
| 58.05                         | 8604   | 0.88     | 89.05    | 729      | 0.07       |
| 59.10                         | 990    | 0.10     | 89.95    | 197      | 0.02       |
| 60.10                         | 16     | 0.00     | 91.05    | 23762    | 2.44       |
| 61.10                         | 21     | 0.00     | 92.10    | 25550.26 |            |
| 62.00                         | 46     | 0.00     | 93.05    | 78050.80 |            |
| 63.05                         | 580    | 0.06     | 94.10    | 14560.15 |            |
| 64.05                         | 672    | 0.07     | 95.05    | 82380.85 |            |
| 65.05                         | 5943   | 0.61     | 96.05    | 815      | 0.08       |
| 66.00                         | 1449   | 0.15     | 97.05    | 41370.43 |            |
| 67.00                         | 14942  | 1.54     | 98.10    | 254      | 0.03       |
| 68.00                         | 1493   | 0.15     | 99.10    | 139      | 0.01       |
| 69.05                         | 13052  | 1.34     | 100.10   | 5        | 0.00       |
|                               |        |          | 131.10   | 12507    | 1.29       |

|        |          |      |        |          |        |        |          |      |
|--------|----------|------|--------|----------|--------|--------|----------|------|
| 132.15 | 29140.30 |      | 176.15 | 654      | 0.07   | 225.10 | 14       | 0.00 |
| 133.15 | 13761    | 1.42 | 177.10 | 60605    | 6.23   | 226.10 | 24       | 0.00 |
| 134.15 | 35160.36 |      | 178.10 | 95450.98 |        | 227.10 | 54       | 0.01 |
| 135.15 | 16703    | 1.72 | 179.10 | 802      | 0.08   | 228.20 | 26       | 0.00 |
| 136.10 | 41970.43 |      | 180.10 | 66       | 0.01   | 229.15 | 803      | 0.08 |
| 137.05 | 51770.53 |      | 181.10 | 37       | 0.00   | 230.25 | 280      | 0.03 |
| 138.10 | 628      | 0.06 | 182.10 | 70       | 0.01   | 231.15 | 48640    | 5.00 |
| 139.10 | 299      | 0.03 | 183.10 | 113      | 0.01   | 232.15 | 84110.87 |      |
| 140.10 | 73       | 0.01 | 184.10 | 148      | 0.02   | 233.10 | 978      | 0.10 |
| 141.10 | 71680.74 |      | 185.10 | 431      | 0.04   | 234.10 | 107      | 0.01 |
| 142.10 | 42860.44 |      | 186.15 | 337      | 0.03   | 235.10 | 5        | 0.00 |
| 143.10 | 53370.55 |      | 187.10 | 27100.28 |        | 236.10 | 24       | 0.00 |
| 144.15 | 23120.24 |      | 188.15 | 842      | 0.09   | 238.10 | 20       | 0.00 |
| 145.10 | 28033    | 2.88 | 189.10 | 18840    | 1.94   | 239.10 | 29       | 0.00 |
| 146.10 | 47860.49 |      | 190.10 | 34720.36 |        | 240.10 | 76       | 0.01 |
| 147.10 | 89860.92 |      | 191.10 | 46800.48 |        | 241.10 | 92       | 0.01 |
| 148.10 | 28030.29 |      | 192.10 | 14100.15 |        | 242.10 | 62       | 0.01 |
| 149.10 | 32844    | 3.38 | 193.10 | 69       | 0.01   | 243.25 | 303      | 0.03 |
| 150.10 | 34500.35 |      | 197.10 | 41       | 0.00   | 244.20 | 324      | 0.03 |
| 151.15 | 15640.16 |      | 198.10 | 46       | 0.00   | 245.20 | 25420.26 |      |
| 152.05 | 13710.14 |      | 199.10 | 206      | 0.02   | 246.20 | 82533    | 8.49 |
| 153.10 | 11330.12 |      | 200.10 | 102      | 0.01   | 247.20 | 14987    | 1.54 |
| 154.05 | 853      | 0.09 | 201.15 | 606      | 0.06   | 248.15 | 15170.16 |      |
| 155.05 | 26740.28 |      | 202.10 | 214      | 0.02   | 249.10 | 120      | 0.01 |
| 156.10 | 22840.23 |      | 203.15 | 84820.87 |        | 250.10 | 53       | 0.01 |
| 157.15 | 40190.41 |      | 204.15 | 27500.28 |        | 251.10 | 19       | 0.00 |
| 158.15 | 11720.12 |      | 205.15 | 972324   | 100.00 | 253.10 | 39       | 0.00 |
| 159.10 | 55700.57 |      | 206.15 | 150404   | 15.47  | 255.10 | 31       | 0.00 |
| 160.15 | 15040.15 |      | 207.15 | 13515    | 1.39   | 256.10 | 18       | 0.00 |
| 161.10 | 22328    | 2.30 | 208.20 | 650      | 0.07   | 257.10 | 167      | 0.02 |
| 162.10 | 39600.41 |      | 209.20 | 18       | 0.00   | 258.10 | 44       | 0.00 |
| 163.10 | 16903    | 1.74 | 210.20 | 22       | 0.00   | 259.10 | 234      | 0.02 |
| 164.10 | 63270.65 |      | 212.20 | 31       | 0.00   | 260.10 | 86       | 0.01 |
| 165.10 | 15420.16 |      | 213.20 | 147      | 0.02   | 262.10 | 107      | 0.01 |
| 166.10 | 312      | 0.03 | 214.20 | 108      | 0.01   | 266.10 | 14       | 0.00 |
| 167.05 | 350      | 0.04 | 215.20 | 181      | 0.02   | 267.10 | 24       | 0.00 |
| 168.10 | 122      | 0.01 | 216.00 | 82       | 0.01   | 269.10 | 11       | 0.00 |
| 169.05 | 420      | 0.04 | 217.05 | 614      | 0.06   | 270.10 | 24       | 0.00 |
| 170.10 | 389      | 0.04 | 218.15 | 826      | 0.08   | 271.10 | 95       | 0.01 |
| 171.10 | 11010.11 |      | 219.15 | 90210.93 |        | 272.10 | 49       | 0.01 |
| 172.05 | 10110.10 |      | 220.15 | 344455   | 35.43  | 273.10 | 2        | 0.00 |
| 173.10 | 29780.31 |      | 221.15 | 55632    | 5.72   | 276.10 | 3        | 0.00 |
| 174.05 | 891      | 0.09 | 222.15 | 47330.49 |        | 277.10 | 8        | 0.00 |
| 175.10 | 36800.38 |      | 223.10 | 235      | 0.02   | 278.10 | 23       | 0.00 |

|        |          |      |        |    |      |        |      |      |
|--------|----------|------|--------|----|------|--------|------|------|
| 280.10 | 25       | 0.00 | 291.30 | 5  | 0.00 | 301.20 | 254  | 0.03 |
| 282.10 | 19       | 0.00 | 292.30 | 3  | 0.00 | 302.25 | 3558 | 0.37 |
| 283.10 | 42       | 0.00 | 294.30 | 15 | 0.00 | 303.25 | 817  | 0.08 |
| 285.10 | 133      | 0.01 | 295.30 | 29 | 0.00 | 304.20 | 55   | 0.01 |
| 286.10 | 56       | 0.01 | 296.30 | 22 | 0.00 | 305.20 | 37   | 0.00 |
| 287.30 | 10150.10 |      | 297.30 | 23 | 0.00 | 306.20 | 21   | 0.00 |
| 288.30 | 318      | 0.03 | 298.30 | 31 | 0.00 | 307.20 | 4    | 0.00 |
| 289.30 | 36       | 0.00 | 300.30 | 74 | 0.01 | 309.20 | 21   | 0.00 |

## 2.5.2 GC-MS Analysis of Raw Reaction Mixture by Using TEMPO as Radical Inhibitor

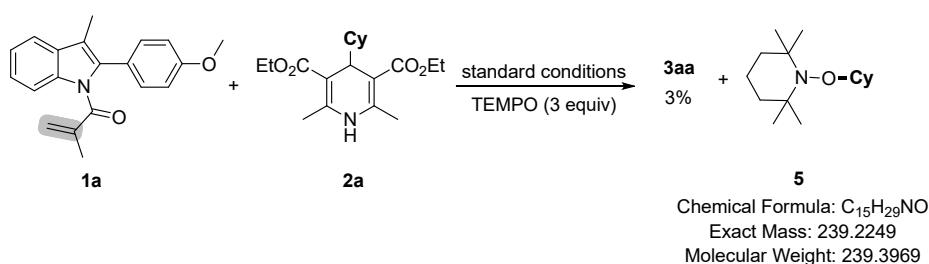

## Spectra of GC-MS

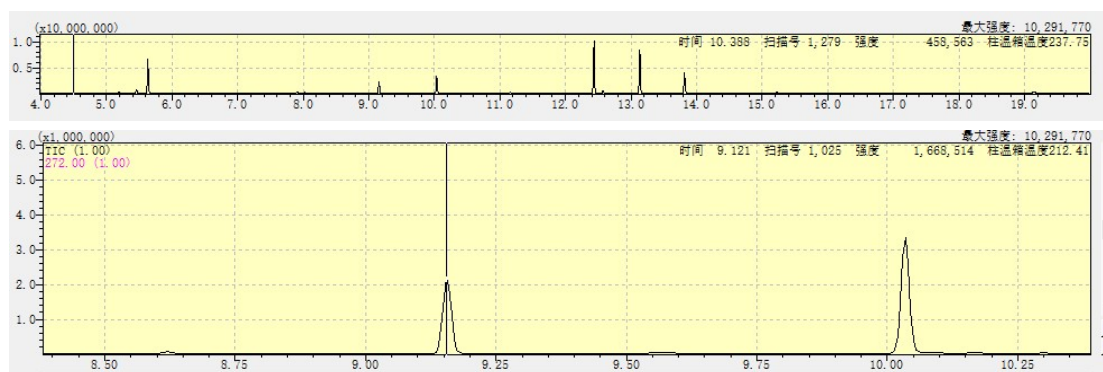

## MS spectra of the peak at 9.155min

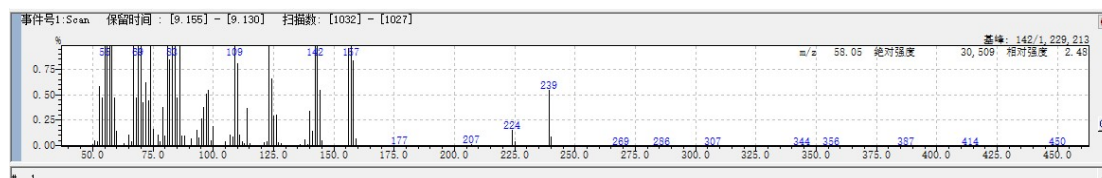

|                     |               |                        |       |          |       |
|---------------------|---------------|------------------------|-------|----------|-------|
| [MS Spectrum]       | Base Peak     | m/z 142.15 (Inten :    | 51.00 | 860      | 0.07  |
| # of Peaks          | 399           | 1,231,943)             | 52.00 | 639      | 0.05  |
| Raw Spectrum        | 9.155 (scan : | Event# 1               | 53.00 | 72920.59 |       |
|                     | 1032)         | m/z Absolute Intensity | 54.05 | 59200.48 |       |
| Background          | No            | Relative Intensity     | 55.05 | 130942   | 10.63 |
| Background Spectrum |               | 50.00 242 0.02         | 56.05 | 44819    | 3.64  |

|        |          |      |        |          |        |        |        |      |
|--------|----------|------|--------|----------|--------|--------|--------|------|
| 57.05  | 15049    | 1.22 | 101.10 | 114      | 0.01   | 145.10 | 759    | 0.06 |
| 58.05  | 30675    | 2.49 | 102.10 | 150      | 0.01   | 146.10 | 71     | 0.01 |
| 59.05  | 58650.48 |      | 103.10 | 70       | 0.01   | 147.10 | 94     | 0.01 |
| 60.05  | 18230.15 |      | 104.10 | 36       | 0.00   | 148.10 | 76     | 0.01 |
| 61.10  | 220      | 0.02 | 105.05 | 613      | 0.05   | 149.10 | 82     | 0.01 |
| 62.10  | 132      | 0.01 | 106.10 | 114      | 0.01   | 150.10 | 24     | 0.00 |
| 63.20  | 399      | 0.03 | 107.15 | 15380.12 |        | 151.10 | 19     | 0.00 |
| 64.00  | 202      | 0.02 | 108.05 | 12200.10 |        | 152.10 | 21     | 0.00 |
| 65.00  | 14440.12 |      | 109.10 | 89060    | 7.23   | 153.10 | 34     | 0.00 |
| 66.05  | 670      | 0.05 | 110.10 | 10090    | 0.82   | 154.10 | 52     | 0.00 |
| 67.00  | 13551    | 1.10 | 111.10 | 13770.11 |        | 155.10 | 178    | 0.01 |
| 68.05  | 59390.48 |      | 112.15 | 642      | 0.05   | 156.15 | 11898  | 0.97 |
| 69.05  | 69815    | 5.67 | 113.05 | 394      | 0.03   | 157.15 | 102844 | 8.35 |
| 70.05  | 15448    | 1.25 | 114.15 | 46670.38 |        | 158.15 | 10452  | 0.85 |
| 71.05  | 53820.44 |      | 115.05 | 450      | 0.04   | 159.15 | 893    | 0.07 |
| 72.05  | 78400.64 |      | 116.10 | 135      | 0.01   | 160.10 | 60     | 0.00 |
| 73.05  | 58050.47 |      | 117.10 | 122      | 0.01   | 161.10 | 68     | 0.01 |
| 74.05  | 59610    | 4.84 | 118.10 | 30       | 0.00   | 162.10 | 50     | 0.00 |
| 75.05  | 23020.19 |      | 119.10 | 161      | 0.01   | 163.10 | 8      | 0.00 |
| 76.00  | 174      | 0.01 | 120.10 | 81       | 0.01   | 164.10 | 70     | 0.01 |
| 77.05  | 15690.13 |      | 121.25 | 480      | 0.04   | 165.10 | 55     | 0.00 |
| 78.10  | 703      | 0.06 | 122.15 | 638      | 0.05   | 166.10 | 39     | 0.00 |
| 79.05  | 48920.40 |      | 123.15 | 14567    | 1.18   | 167.10 | 33     | 0.00 |
| 80.05  | 13240.11 |      | 124.15 | 82360.67 |        | 168.10 | 46     | 0.00 |
| 81.05  | 16481    | 1.34 | 125.15 | 37290.30 |        | 169.10 | 5      | 0.00 |
| 82.05  | 10609    | 0.86 | 126.15 | 39310.32 |        | 170.10 | 19     | 0.00 |
| 83.05  | 35680    | 2.90 | 127.10 | 527      | 0.04   | 171.10 | 21     | 0.00 |
| 84.05  | 15883    | 1.29 | 128.10 | 340      | 0.03   | 172.10 | 21     | 0.00 |
| 85.05  | 58580.48 |      | 129.10 | 159      | 0.01   | 173.10 | 78     | 0.01 |
| 86.00  | 13225    | 1.07 | 130.10 | 52       | 0.00   | 174.10 | 66     | 0.01 |
| 87.05  | 12990.11 |      | 131.10 | 89       | 0.01   | 175.10 | 57     | 0.00 |
| 88.05  | 13450.11 |      | 132.10 | 90       | 0.01   | 176.10 | 86     | 0.01 |
| 89.00  | 135      | 0.01 | 133.10 | 116      | 0.01   | 177.10 | 90     | 0.01 |
| 89.90  | 27       | 0.00 | 134.10 | 74       | 0.01   | 178.10 | 63     | 0.01 |
| 90.95  | 11930.10 |      | 135.10 | 522      | 0.04   | 179.10 | 22     | 0.00 |
| 91.90  | 242      | 0.02 | 136.10 | 300      | 0.02   | 181.10 | 31     | 0.00 |
| 93.10  | 19830.16 |      | 137.10 | 74       | 0.01   | 182.10 | 50     | 0.00 |
| 94.10  | 11030.09 |      | 138.15 | 788      | 0.06   | 183.10 | 33     | 0.00 |
| 95.05  | 34790.28 |      | 139.20 | 329      | 0.03   | 184.10 | 27     | 0.00 |
| 96.05  | 48390.39 |      | 140.15 | 43330.35 |        | 185.10 | 46     | 0.00 |
| 97.10  | 64410.52 |      | 141.15 | 18690.15 |        | 186.10 | 6      | 0.00 |
| 98.10  | 68970.56 |      | 142.15 | 1231943  | 100.00 | 187.10 | 19     | 0.00 |
| 99.05  | 769      | 0.06 | 143.15 | 111090   | 9.02   | 188.10 | 47     | 0.00 |
| 100.10 | 24280.20 |      | 144.15 | 68730.56 |        | 189.10 | 30     | 0.00 |



|        |     |      |               |             |             |        |    |      |
|--------|-----|------|---------------|-------------|-------------|--------|----|------|
| 190.10 | 54  | 0.00 | 220.00        | 27          | 0.00        | 250.20 | 47 | 0.00 |
| 191.10 | 68  | 0.01 | 221.00        | 36          | 0.00        | 251.20 | 21 | 0.00 |
| 192.10 | 47  | 0.00 | 222.00        | 33          | 0.00        | 252.20 | 26 | 0.00 |
| 193.10 | 73  | 0.01 | 223.00        | 36          | 0.00        | 253.20 | 44 | 0.00 |
| 194.10 | 31  | 0.00 | 224.15        | 20570.17    |             | 254.20 | 38 | 0.00 |
| 195.10 | 50  | 0.00 | 225.30        | 564         | 0.05        | 255.20 | 27 | 0.00 |
| 196.10 | 42  | 0.00 | 226.30        | 30          | 0.00        | 256.20 | 26 | 0.00 |
| 197.10 | 27  | 0.00 | 227.30        | 33          | 0.00        | 257.20 | 24 | 0.00 |
| 198.10 | 24  | 0.00 | 228.30        | 36          | 0.00        | 258.20 | 49 | 0.00 |
| 199.10 | 36  | 0.00 | 229.30        | 58          | 0.00        | 259.20 | 14 | 0.00 |
| 200.10 | 24  | 0.00 | 230.30        | 39          | 0.00        | 260.20 | 26 | 0.00 |
| 201.10 | 41  | 0.00 | 231.30        | 11          | 0.00        | 261.20 | 31 | 0.00 |
| 202.10 | 65  | 0.01 | 232.30        | 34          | 0.00        | 262.20 | 22 | 0.00 |
| 203.10 | 22  | 0.00 | 233.30        | 70          | 0.01        | 263.20 | 36 | 0.00 |
| 204.10 | 65  | 0.01 | 234.30        | 27          | 0.00        | 264.20 | 31 | 0.00 |
| 205.10 | 30  | 0.00 | 235.30        | 30          | 0.00        | 265.20 | 50 | 0.00 |
| 206.10 | 24  | 0.00 | 236.30        | 30          | 0.00        | 266.20 | 44 | 0.00 |
| 207.00 | 431 | 0.03 | 237.30        | 22          | 0.00        | 267.20 | 63 | 0.01 |
| 208.00 | 70  | 0.01 | <b>238.20</b> | <b>33</b>   | <b>0.00</b> | 268.20 | 36 | 0.00 |
| 209.00 | 79  | 0.01 | <b>239.20</b> | <b>6830</b> | <b>0.55</b> | 269.20 | 49 | 0.00 |
| 210.00 | 22  | 0.00 | <b>240.20</b> | <b>1167</b> | <b>0.09</b> | 270.20 | 33 | 0.00 |
| 211.00 | 47  | 0.00 | <b>241.20</b> | <b>143</b>  | <b>0.01</b> | 271.20 | 42 | 0.00 |
| 212.00 | 34  | 0.00 | 242.20        | 71          | 0.01        | 272.20 | 29 | 0.00 |
| 213.00 | 33  | 0.00 | 243.20        | 36          | 0.00        | 273.20 | 54 | 0.00 |
| 214.00 | 24  | 0.00 | 244.20        | 29          | 0.00        | 275.20 | 26 | 0.00 |
| 215.00 | 29  | 0.00 | 245.20        | 33          | 0.00        | 276.20 | 29 | 0.00 |
| 216.00 | 24  | 0.00 | 246.20        | 21          | 0.00        | 277.20 | 47 | 0.00 |
| 217.00 | 74  | 0.01 | 247.20        | 46          | 0.00        | 278.20 | 8  | 0.00 |
| 218.00 | 42  | 0.00 | 248.20        | 18          | 0.00        | 279.20 | 31 | 0.00 |
| 219.00 | 118 | 0.01 | 249.20        | 16          | 0.00        | 280.20 | 14 | 0.00 |

### 3. References

- [1] Wei, Y.-L.; Chen, J. Q.; Sun, B.; Xu, P. F. *Chem. Commun.* **2019**, *55*, 5922.
- [2] Gu, F.; Huang, W.; Liu, X. Chen W.; Cheng, X. *Adv. Synth. Catal.*, **2018**, *360*, 925.
- [3] Wu, Q. Y.; Min, Q. Q.; Ao, G. Z.; Liu, F. *Org. Biomol. Chem.*, **2018**, *16*, 6391.

## 4. $^1\text{H}$ and $^{13}\text{C}$ spectra

### 5-(Cyclohexylmethyl)-2-methoxy-1H-indole-3-carboxamide

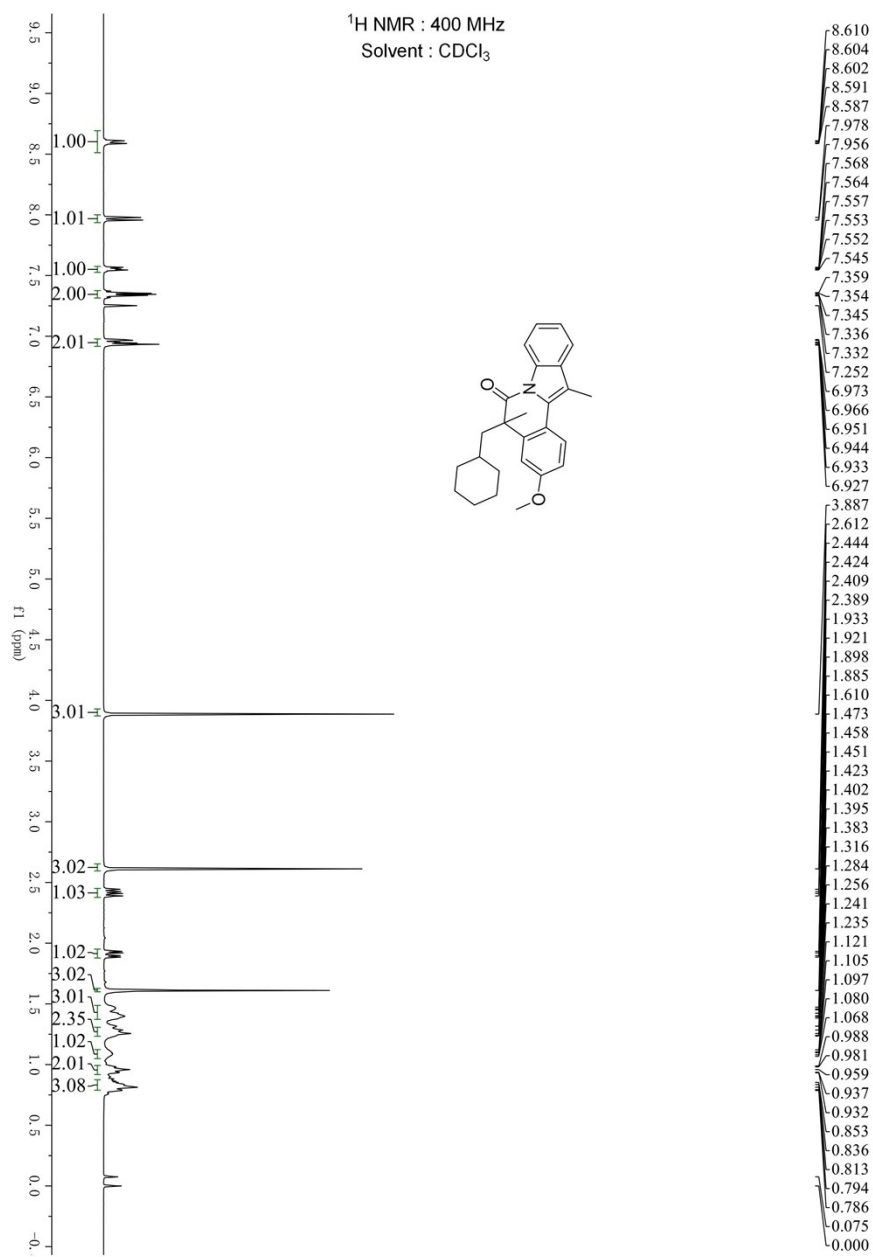

$^{13}\text{C}$   $\{^1\text{H}\}$  NMR : 100 MHz  
Solvent :  $\text{CDCl}_3$

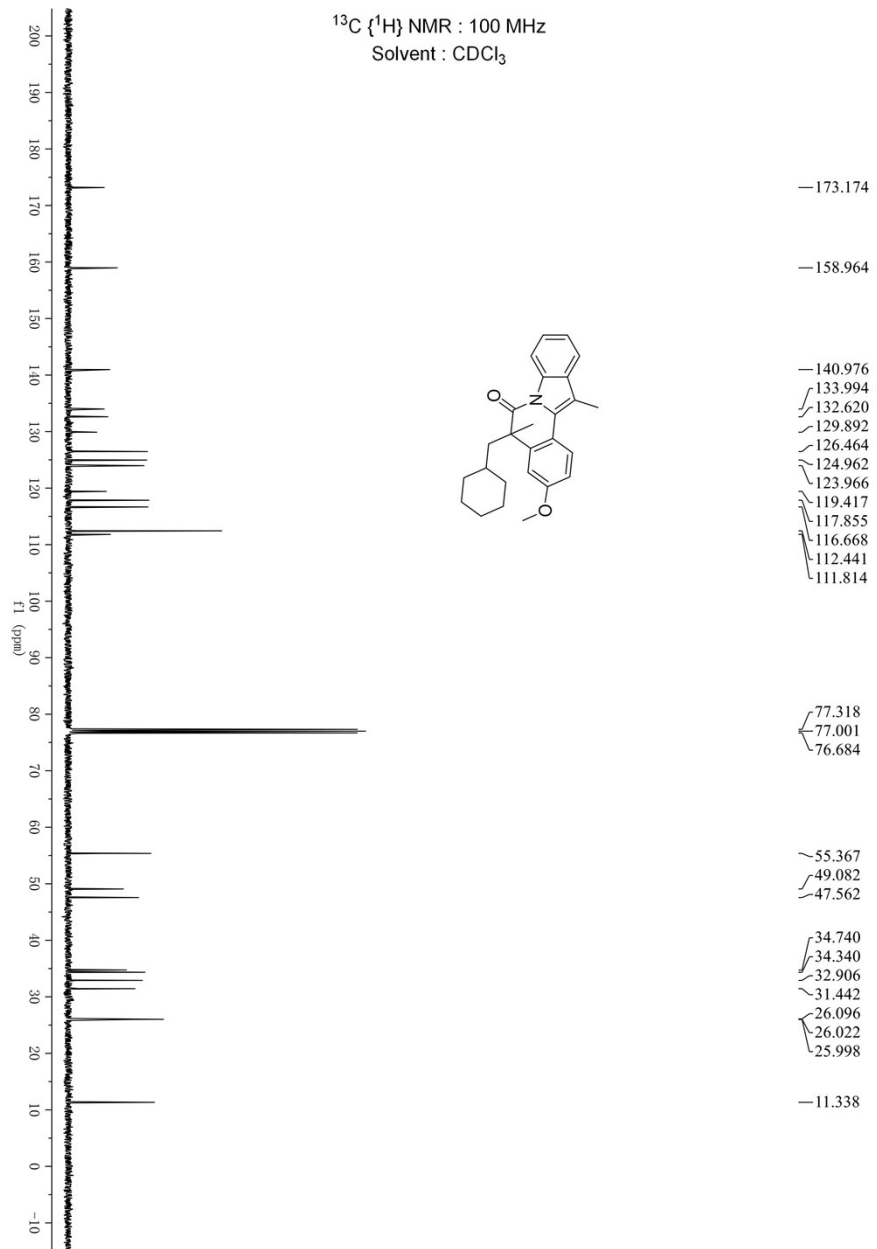

# 5-(Cyclohexy

<sup>1</sup>H NMR : 400 MHz  
Solvent : CDCl<sub>3</sub>

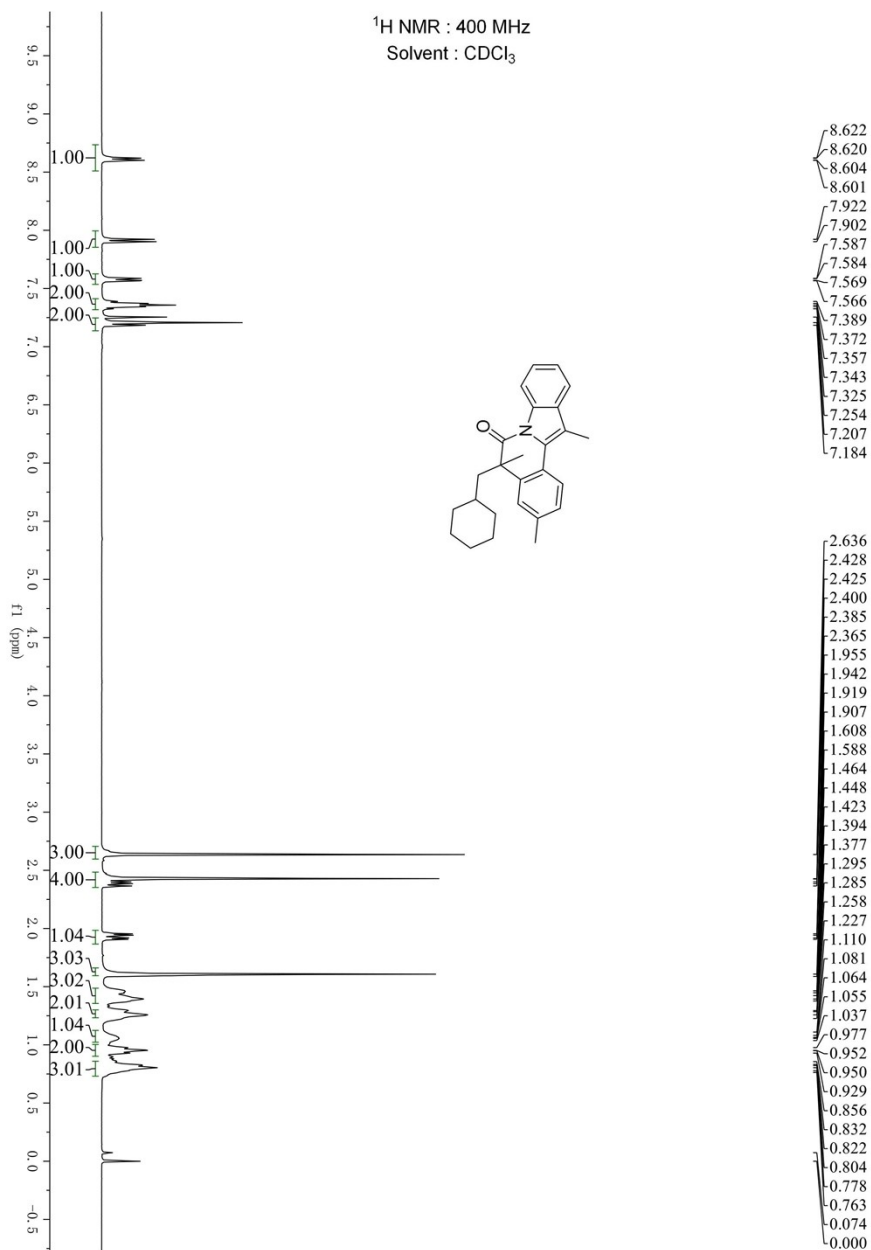

$^{13}\text{C}$   $\{^1\text{H}\}$  NMR : 100 MHz  
Solvent :  $\text{CDCl}_3$

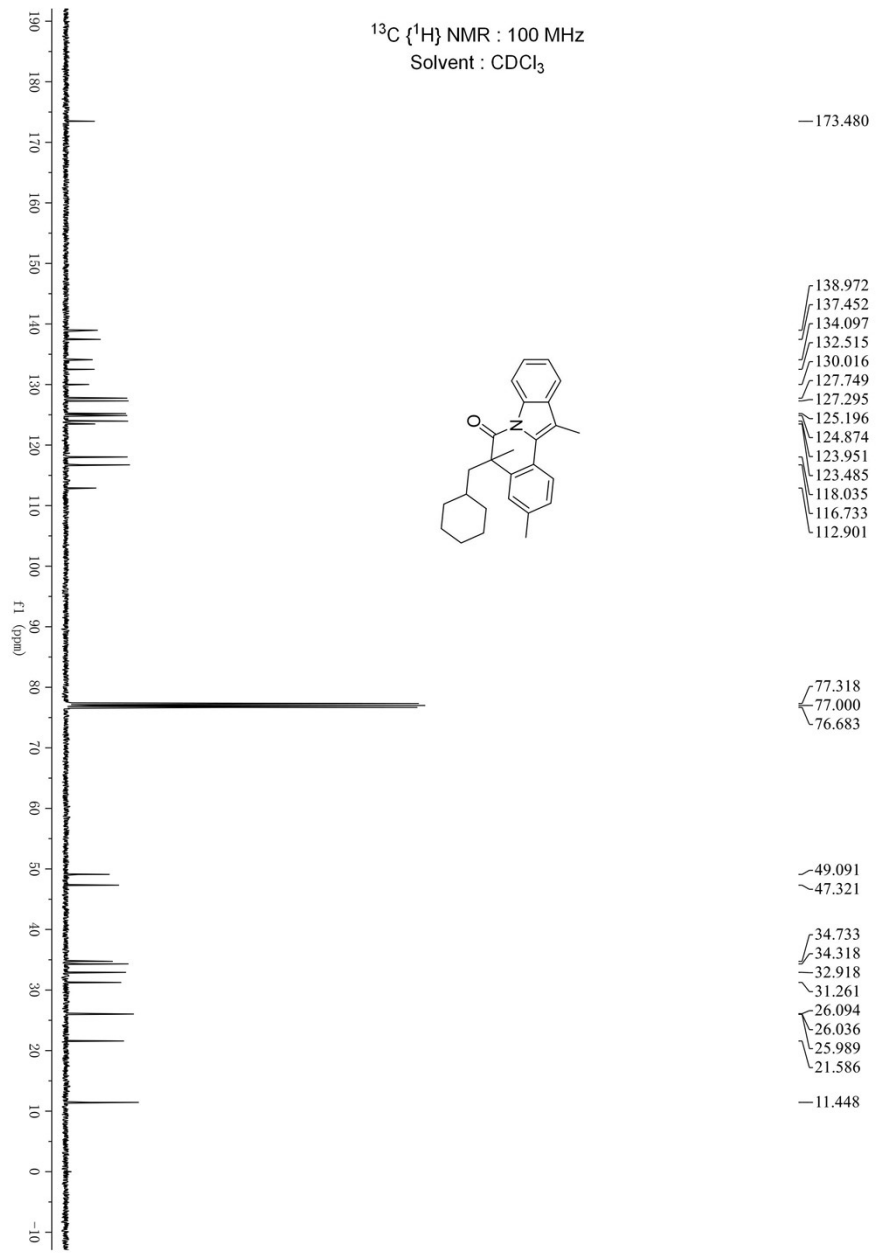

5-(Cyclohexylmethyl)-1-methyl-2-phenyl-1H-indole-3-carboxamide

<sup>1</sup>H NMR : 400 MHz  
Solvent : CDCl<sub>3</sub>

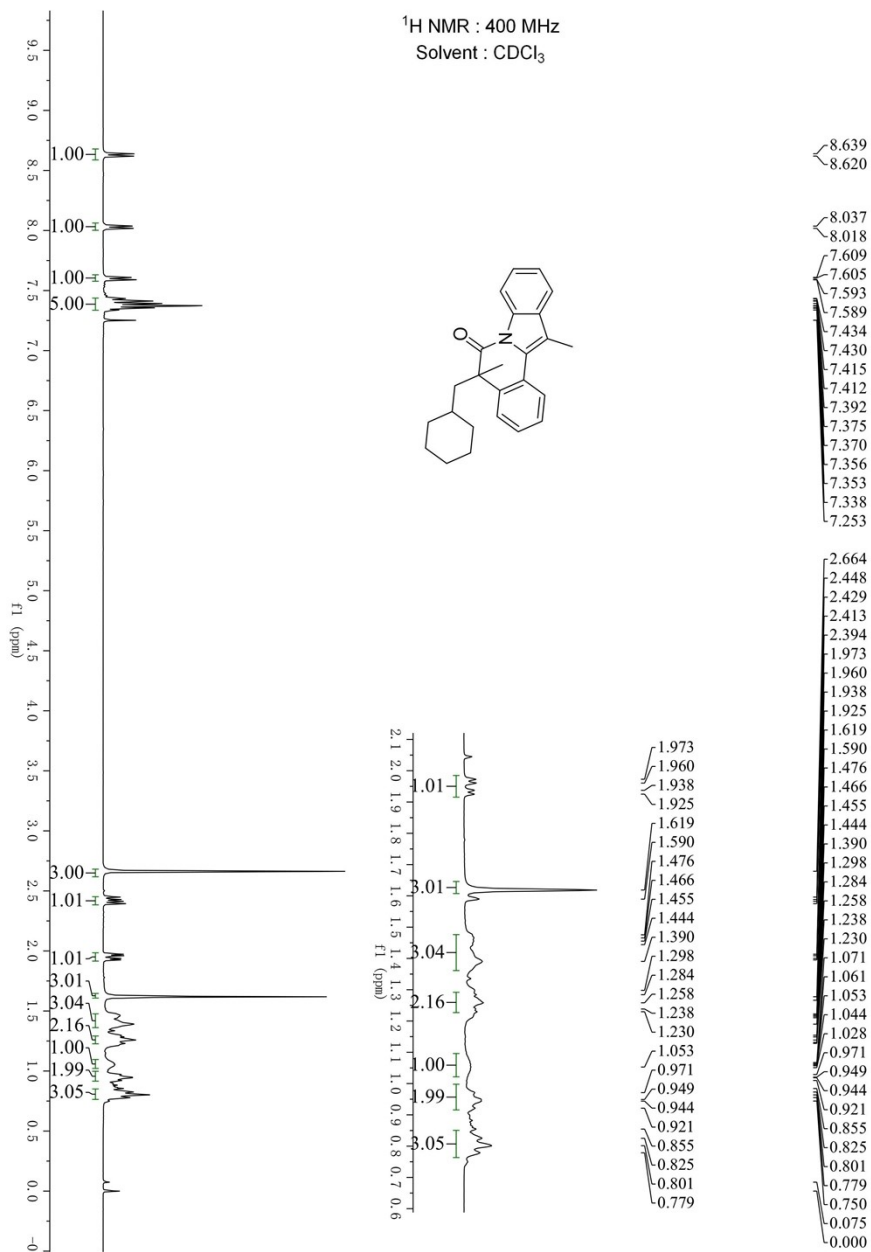

$^{13}\text{C} \{^1\text{H}\}$  NMR : 100 MHz  
Solvent :  $\text{CDCl}_3$

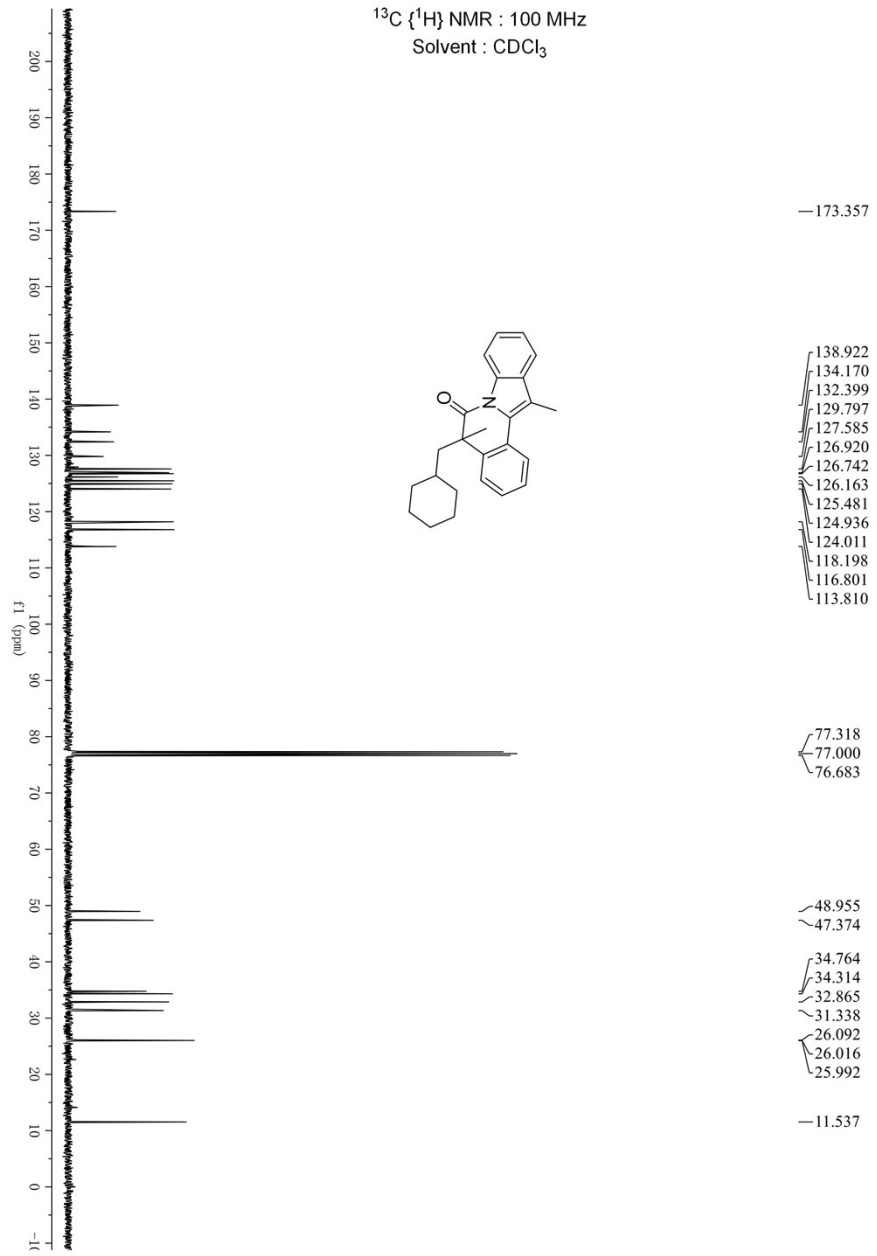

# 5-(Cyclohexy

<sup>1</sup>H NMR : 400 MHz  
Solvent : CDCl<sub>3</sub>

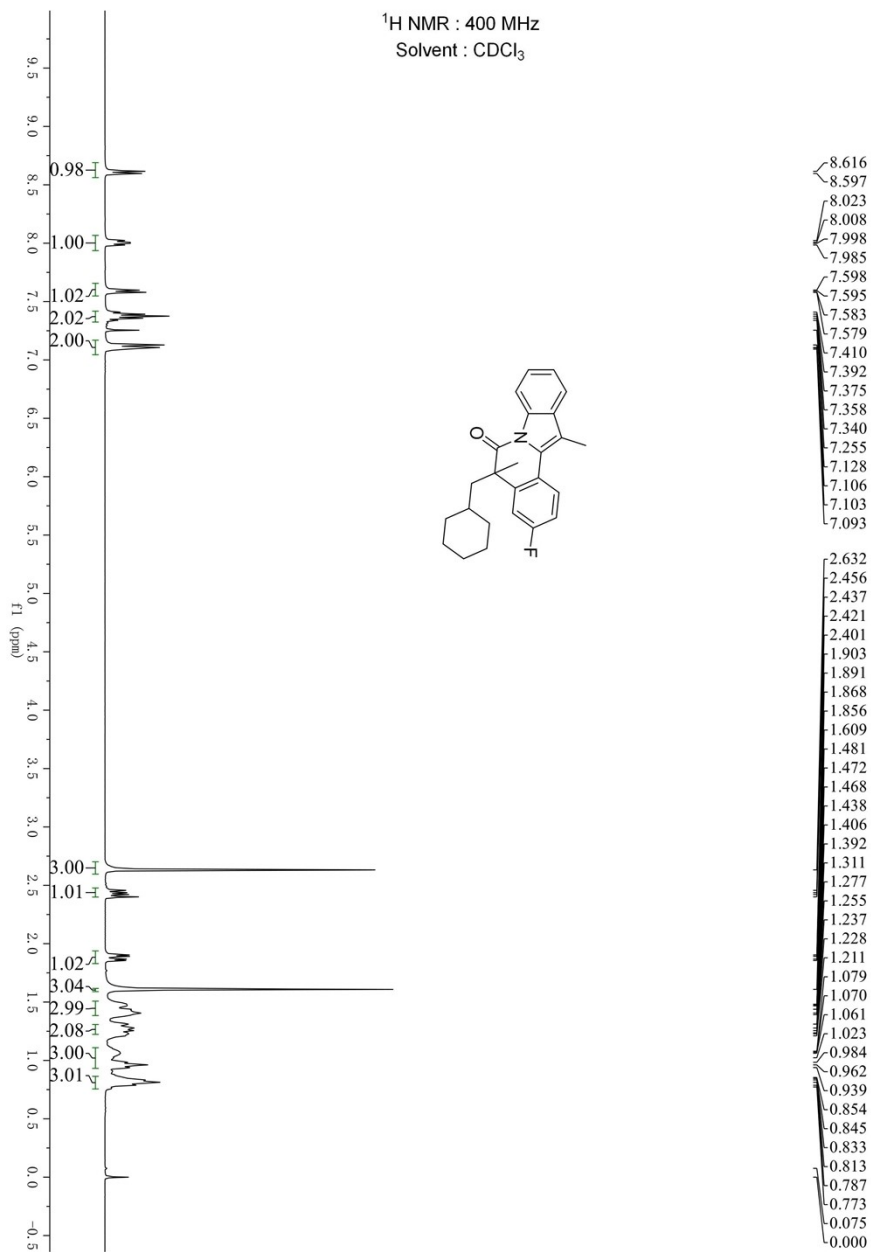



$^{13}\text{C}$   $\{^1\text{H}\}$  NMR : 100 MHz  
Solvent :  $\text{CDCl}_3$

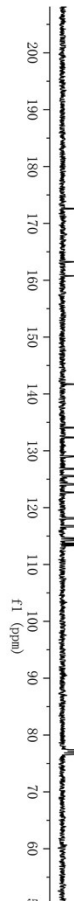

— 172.594  
— 163.251  
— 160.784

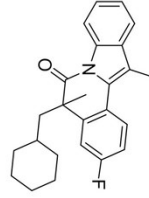

— 141.763  
— 141.693  
— 134.046  
— 132.315  
— 129.063  
— 126.883  
— 126.800  
— 125.547  
— 124.136  
— 122.653  
— 122.623  
— 118.184  
— 116.763  
— 114.543  
— 114.325  
— 113.749  
— 113.527  
— 113.365  
— 113.345  
— 77.318  
— 77.001  
— 76.683

— 48.994

$^{19}\text{F}$  NMR : 282 MHz  
Solvent :  $\text{CDCl}_3$

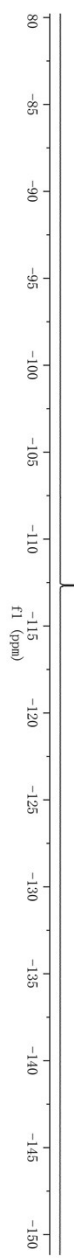

— 112.667

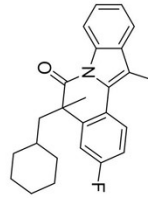



# 3-Chloro-5-(cyclohexylmethyl)indole

<sup>1</sup>H NMR : 400 MHz  
Solvent : CDCl<sub>3</sub>

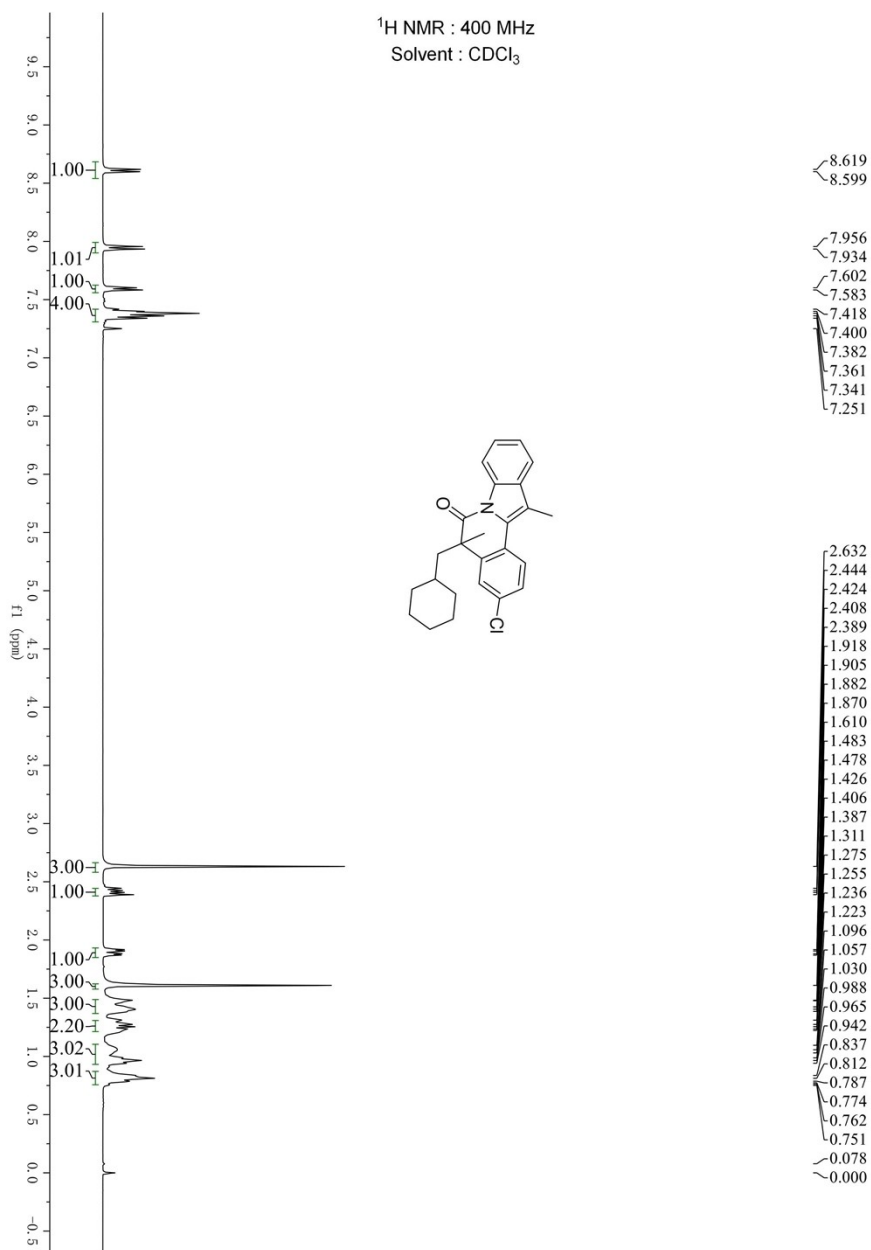

$^{13}\text{C}$   $\{^1\text{H}\}$  NMR : 100 MHz  
Solvent :  $\text{CDCl}_3$

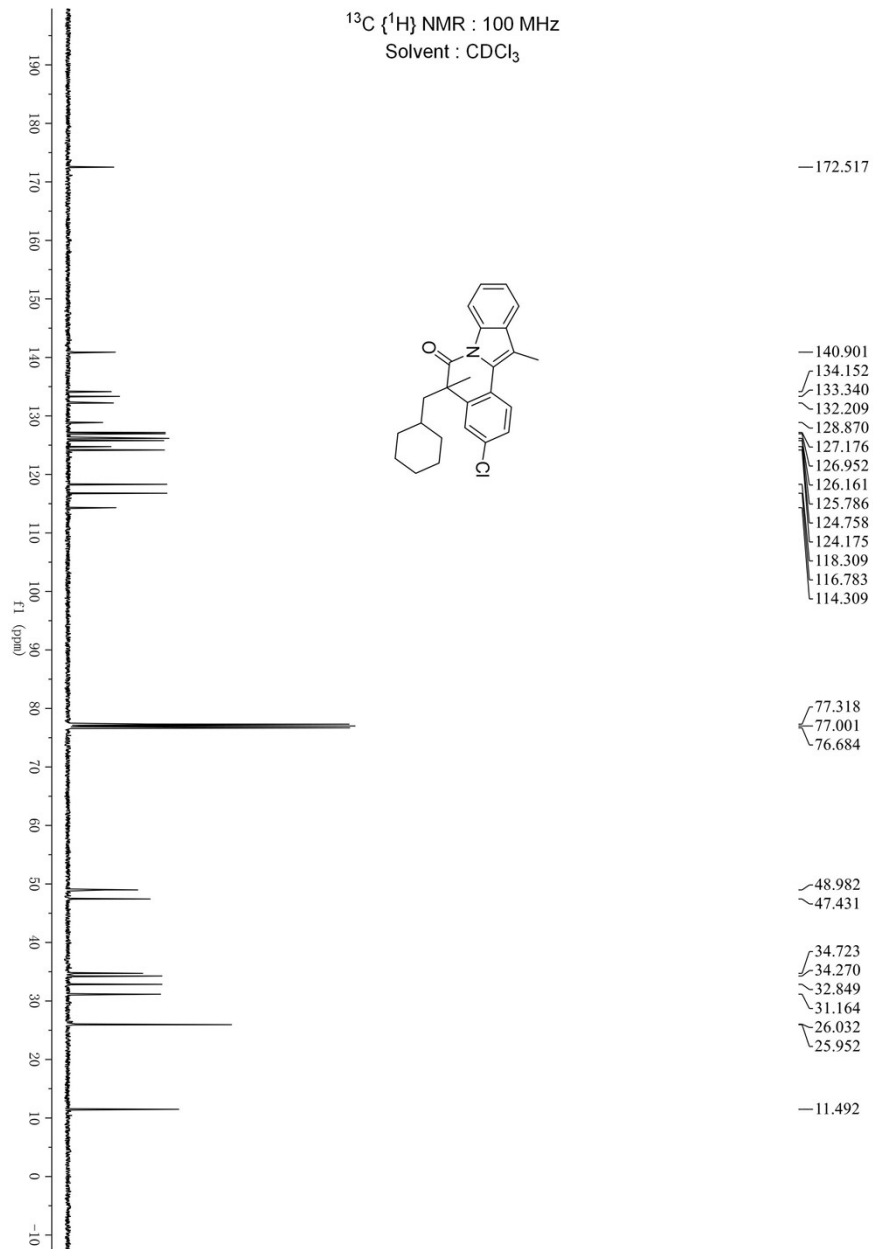

# 3-Bromo-5-(cyclohexylmethyl)-1H-indole-2-one

<sup>1</sup>H NMR : 400 MHz  
Solvent : CDCl<sub>3</sub>

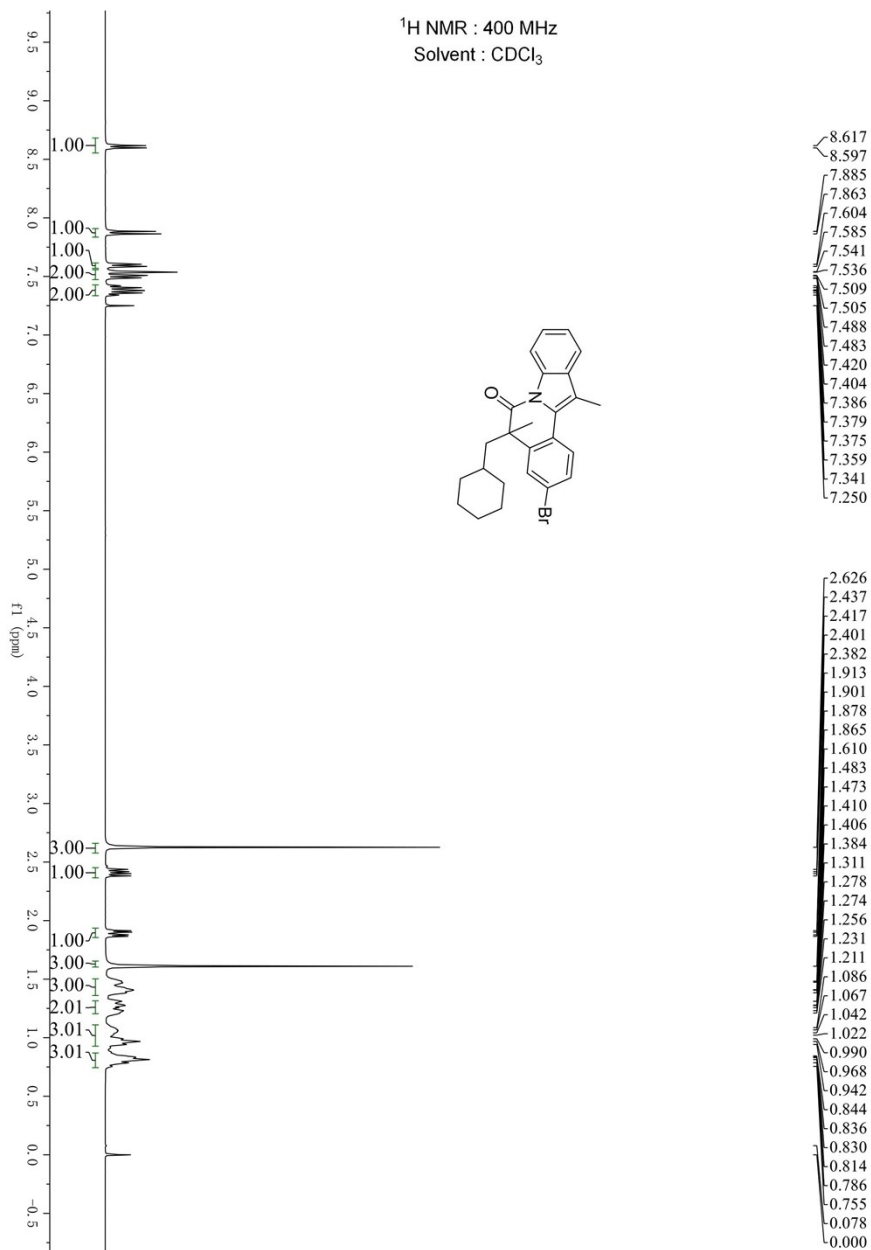

$^{13}\text{C}$  { $^1\text{H}$ } NMR : 100 MHz  
Solvent :  $\text{CDCl}_3$

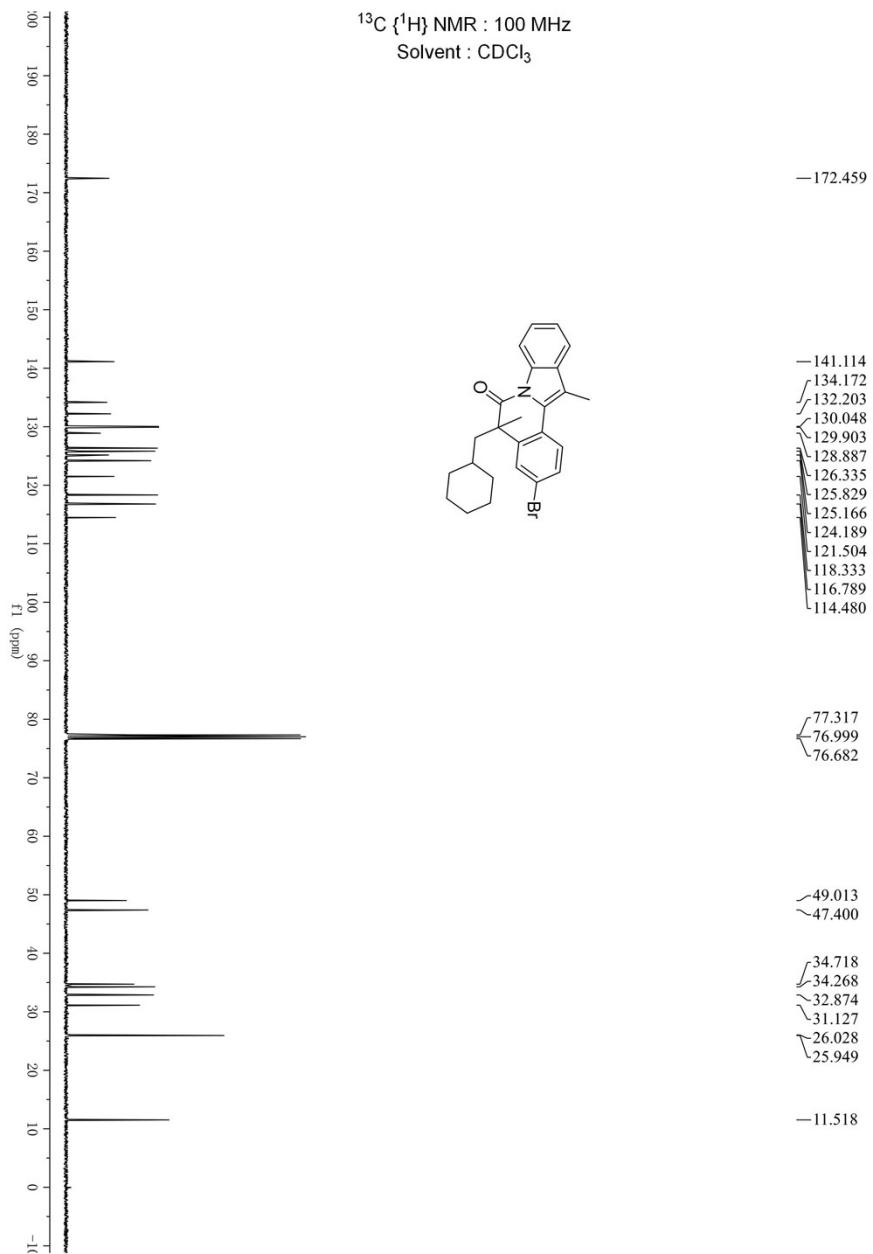

# 5-(Cyclohexyl)

$^1\text{H NMR}$  : 400 MHz  
Solvent :  $\text{CDCl}_3$

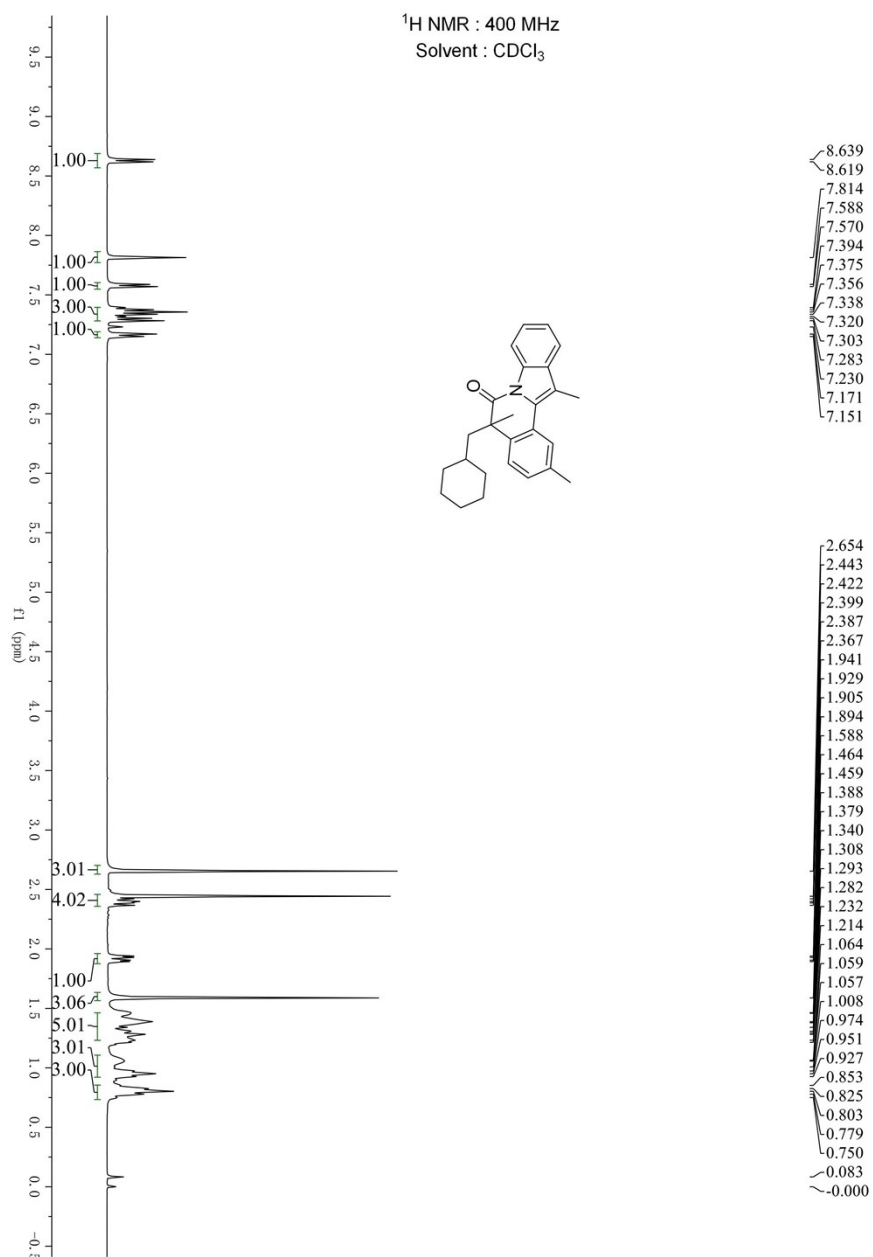

$^{13}\text{C}$   $\{^1\text{H}\}$  NMR : 100 MHz  
Solvent :  $\text{CDCl}_3$

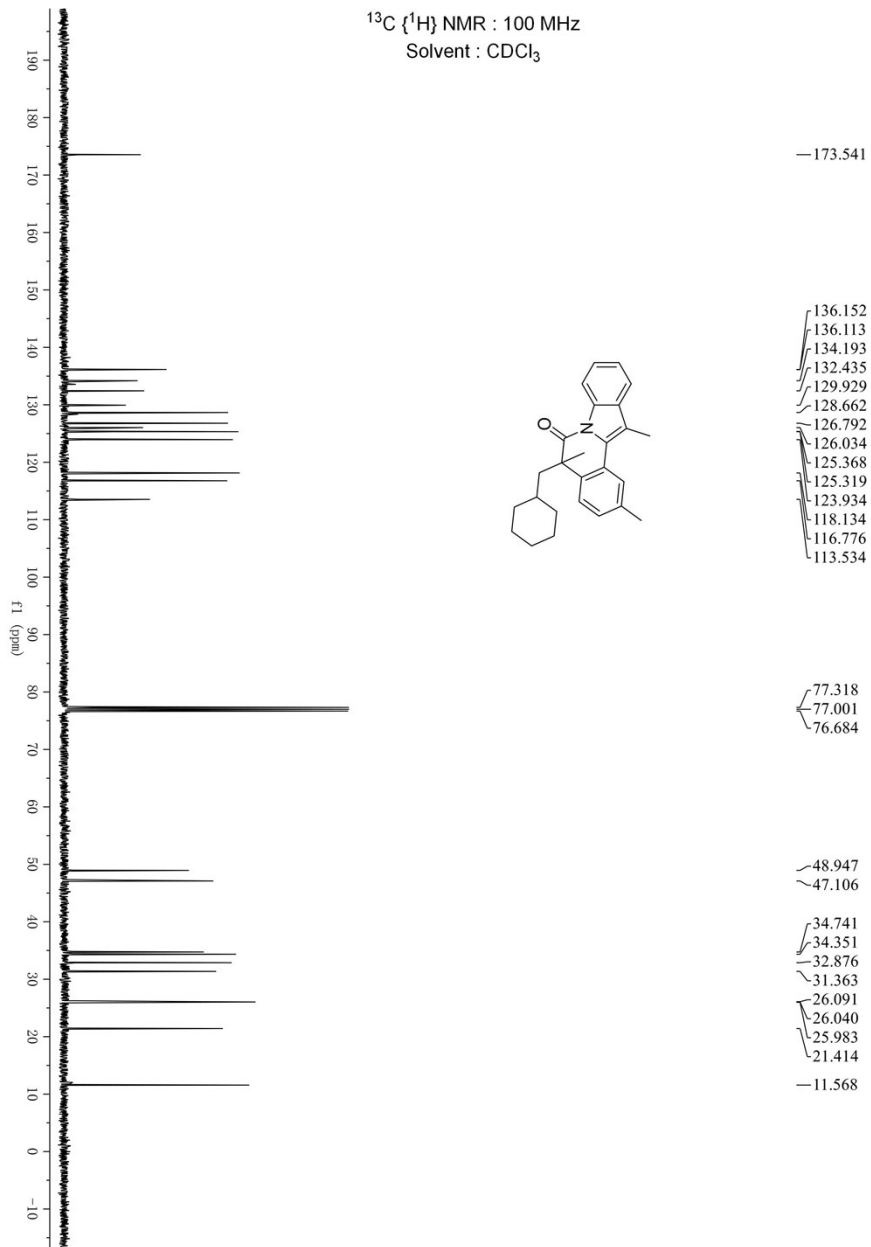



# 4-(Cyclohexyl)

$^1\text{H NMR}$  : 400 MHz  
Solvent :  $\text{CDCl}_3$

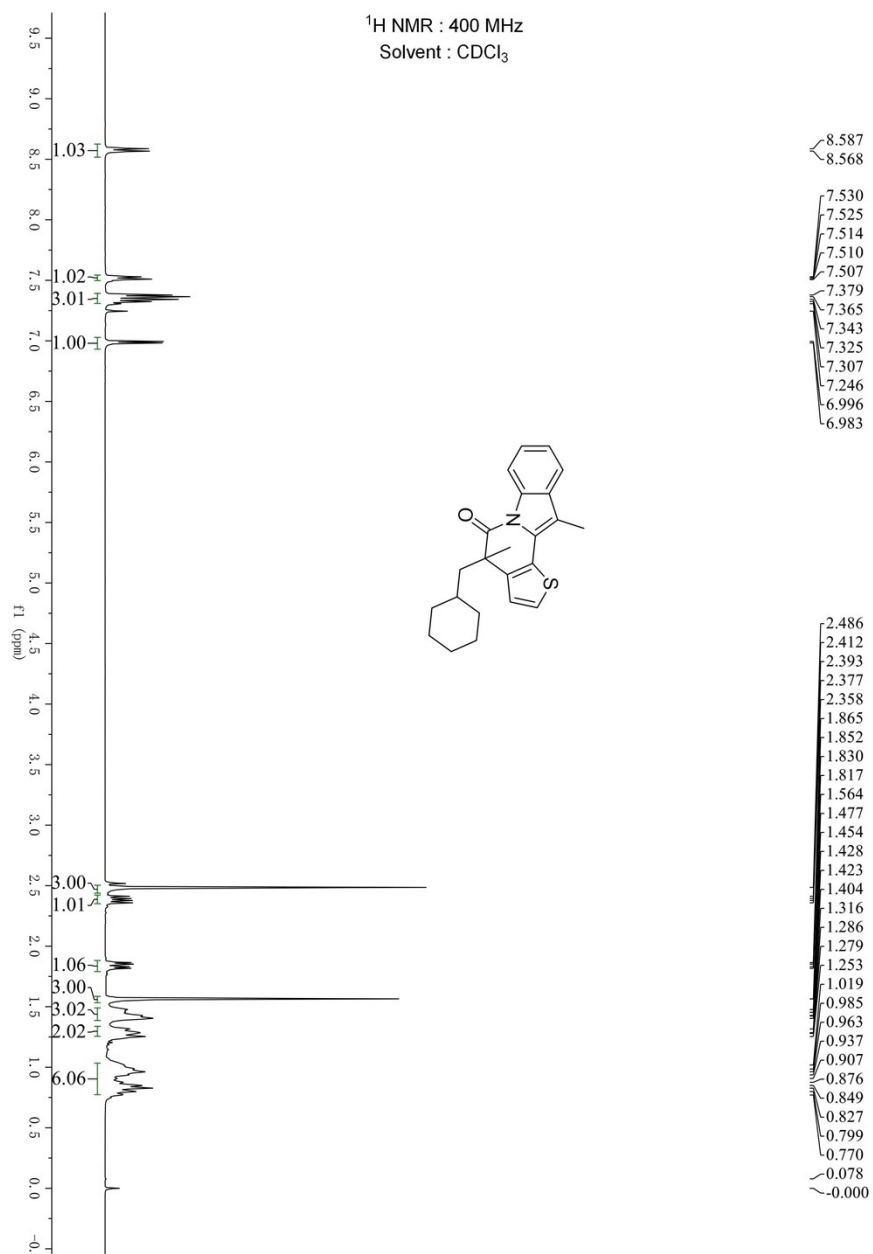

$^{13}\text{C}$   $\{^1\text{H}\}$  NMR : 100 MHz  
Solvent :  $\text{CDCl}_3$

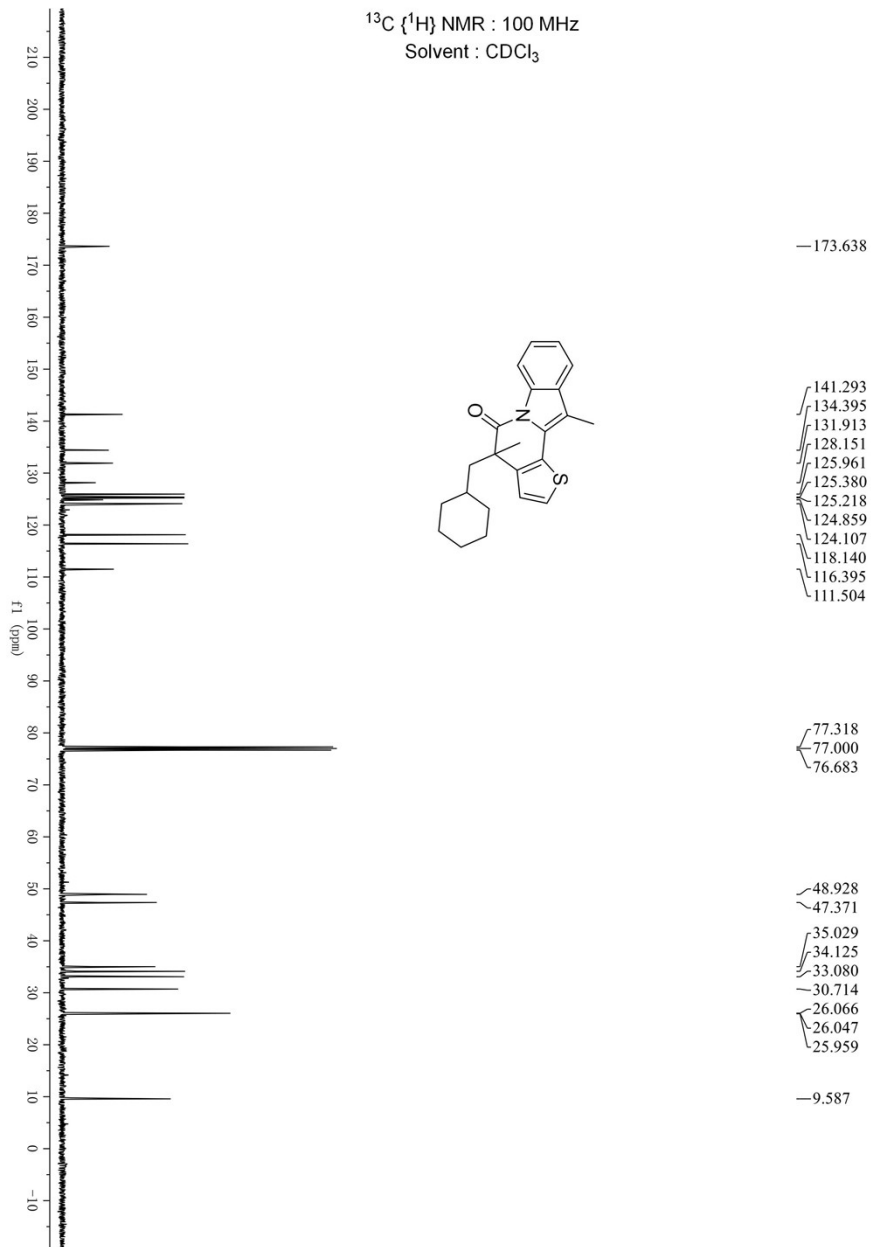

# 5-Benzyl-5-(

<sup>1</sup>H NMR : 400 MHz  
Solvent : CDCl<sub>3</sub>

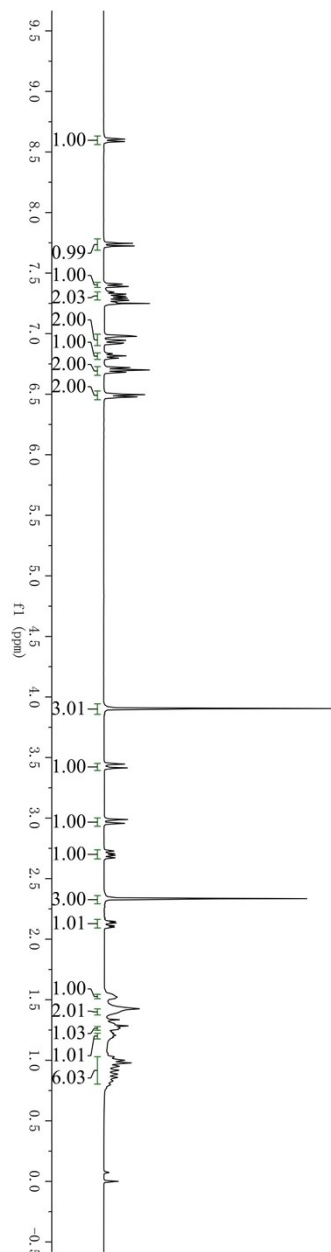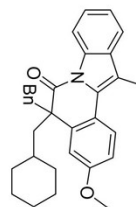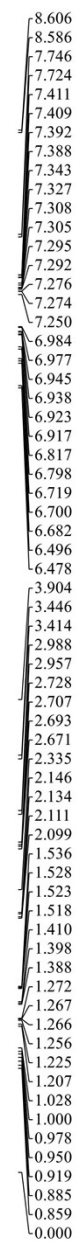

$^{13}\text{C}$   $\{^1\text{H}\}$  NMR : 100 MHz  
Solvent :  $\text{CDCl}_3$

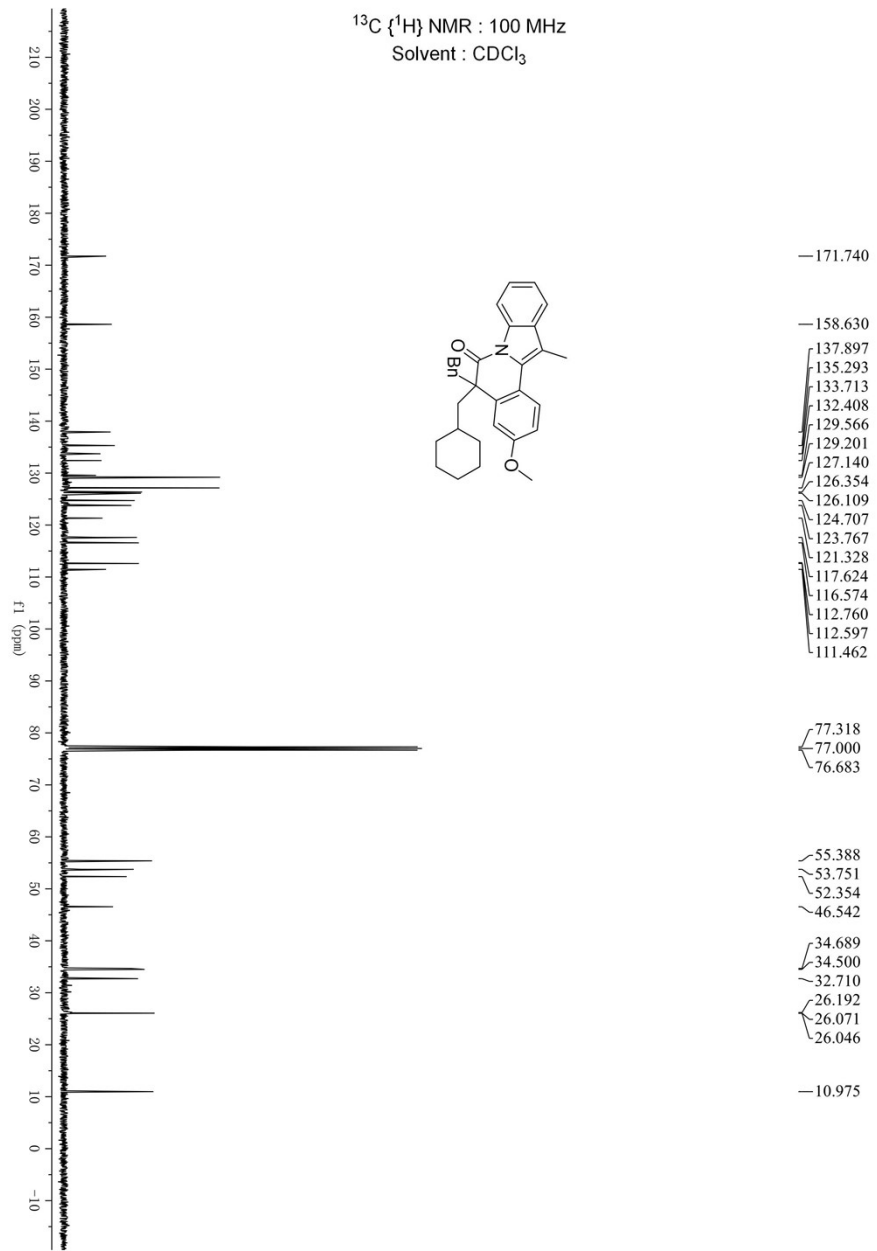

# 5-(Cyclohex

<sup>1</sup>H NMR : 400 MHz  
Solvent : CDCl<sub>3</sub>

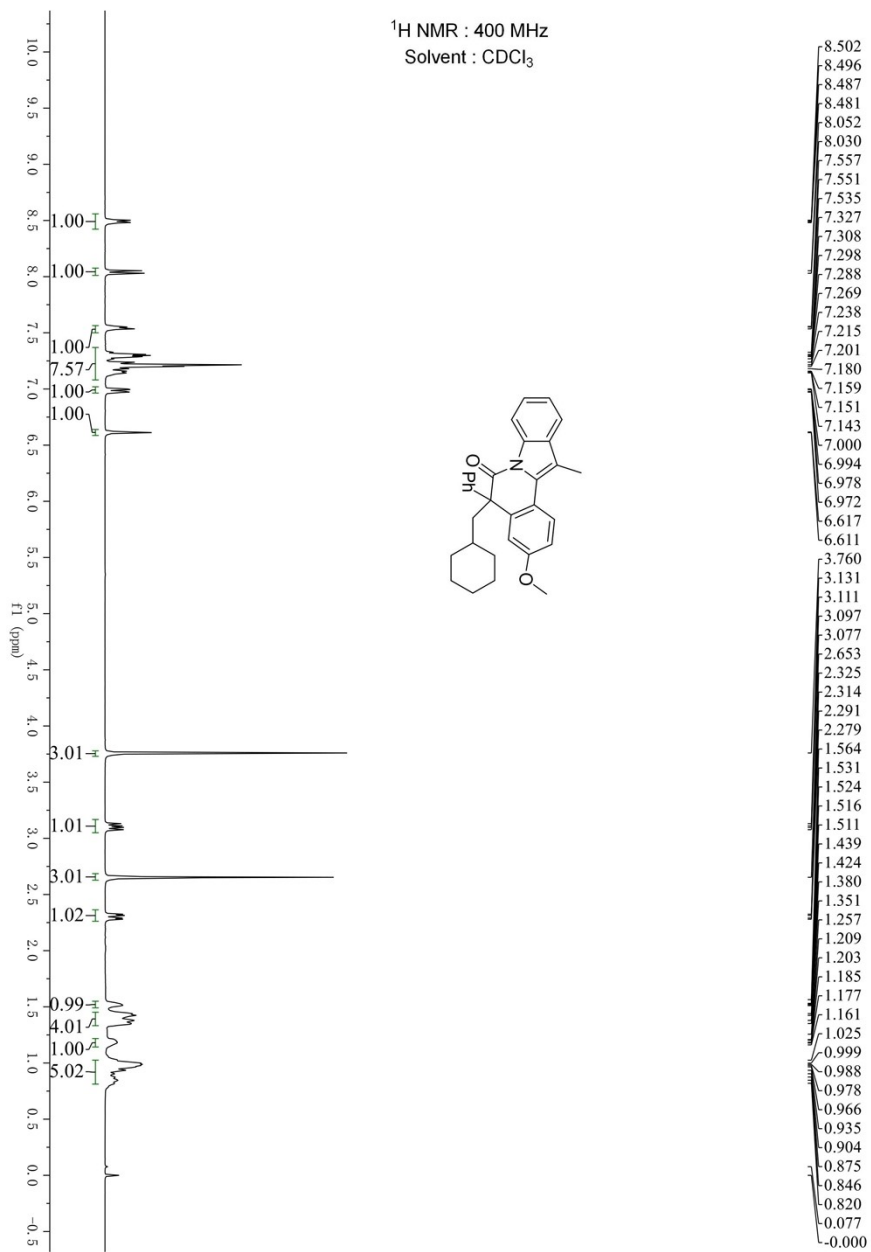

$^{13}\text{C}$   $\{^1\text{H}\}$  NMR : 100 MHz  
Solvent :  $\text{CDCl}_3$

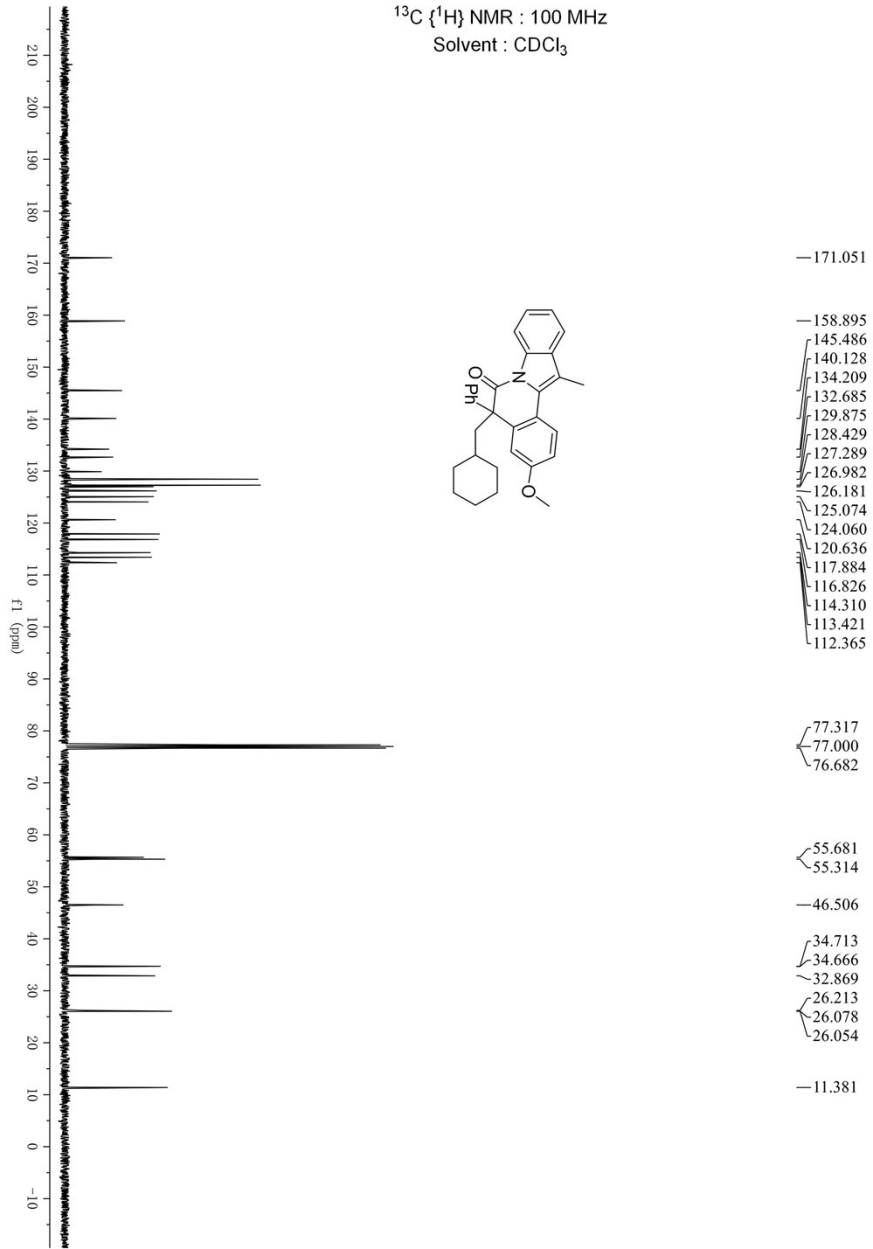

# 5-(Cyclohexyl)-1H-indole-3-carboxylic acid ethyl ester

$^1\text{H NMR}$  : 400 MHz  
Solvent :  $\text{CDCl}_3$

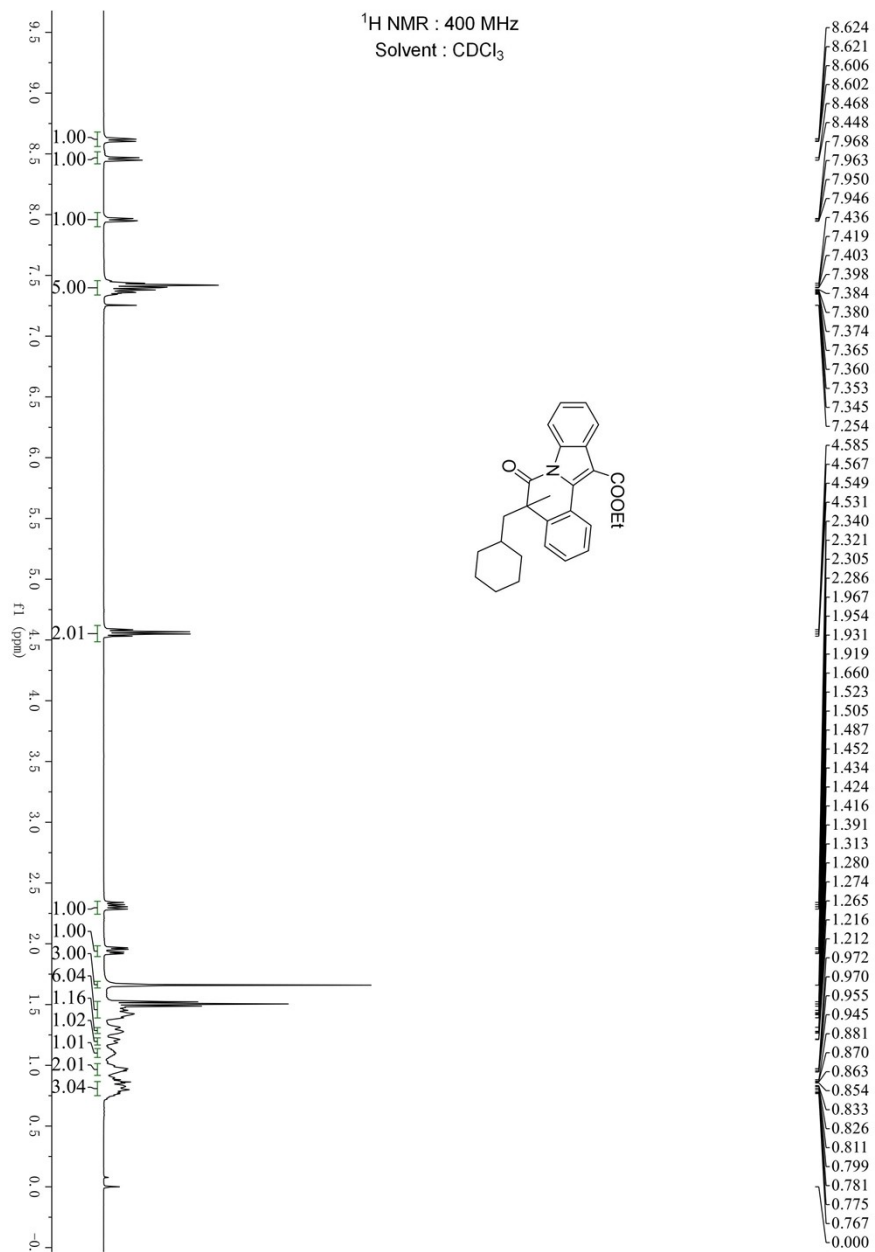

$^{13}\text{C} \{^1\text{H}\}$  NMR : 100 MHz  
Solvent :  $\text{CDCl}_3$

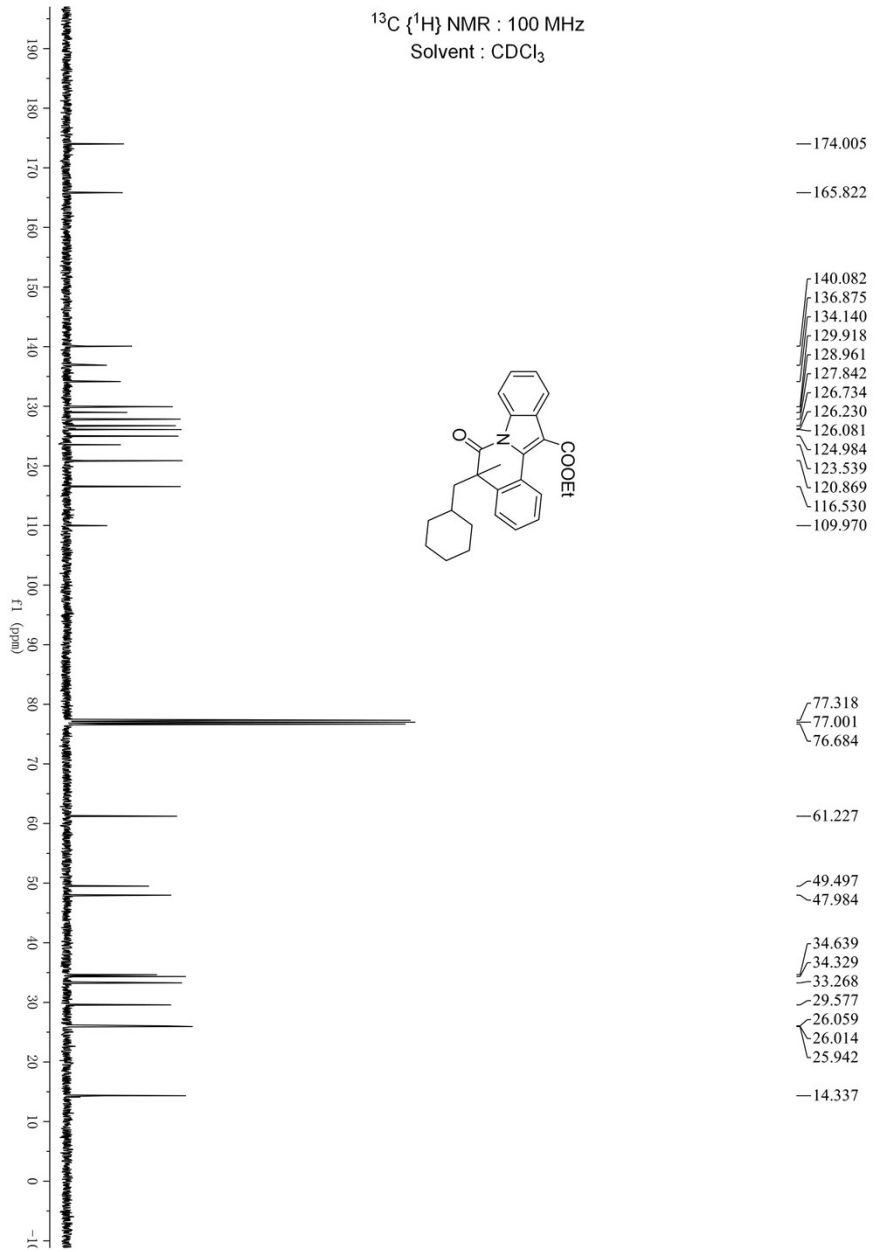



# 5-(Cyclohexylmethyl)-1H-indole-3-carboxamide

<sup>1</sup>H NMR : 400 MHz  
Solvent : CDCl<sub>3</sub>

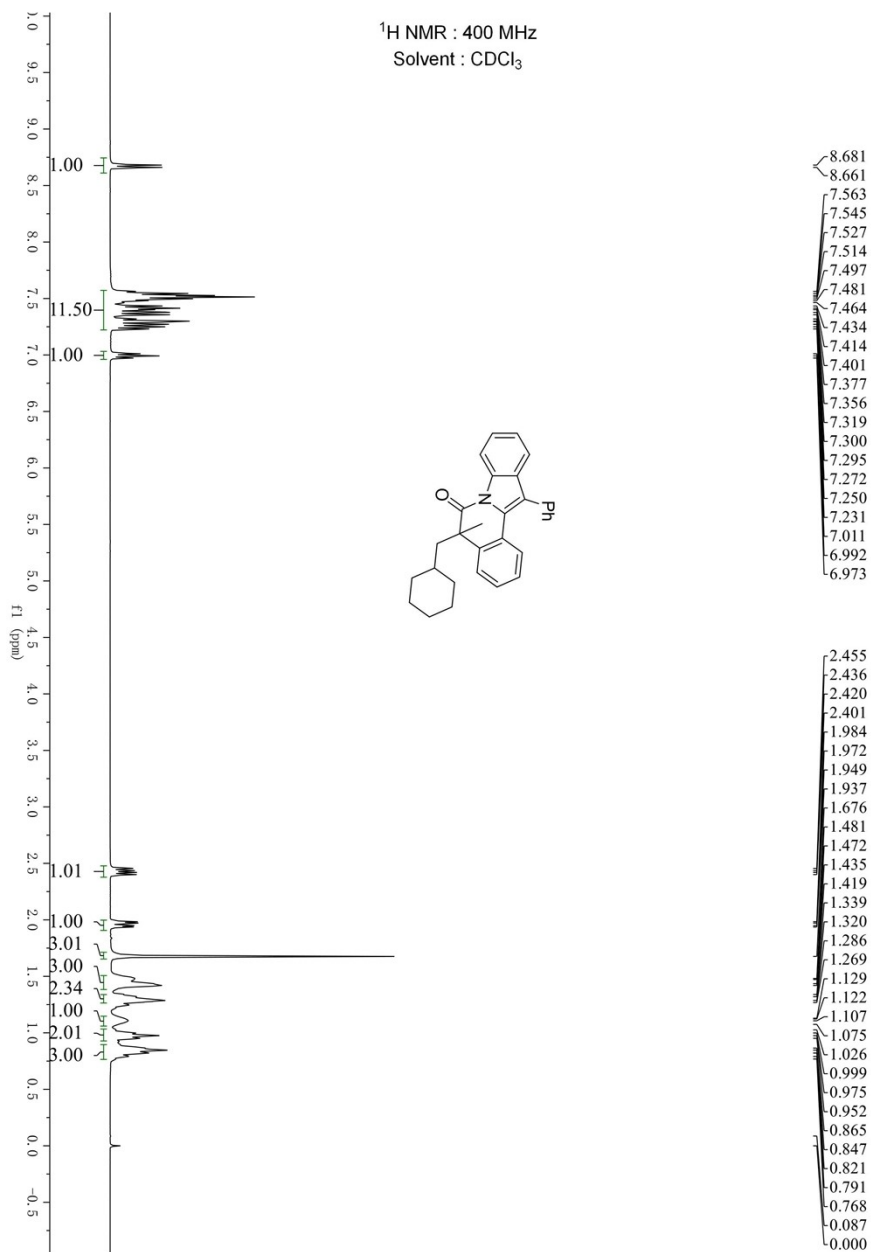

$^{13}\text{C}$   $\{^1\text{H}\}$  NMR : 100 MHz  
Solvent :  $\text{CDCl}_3$

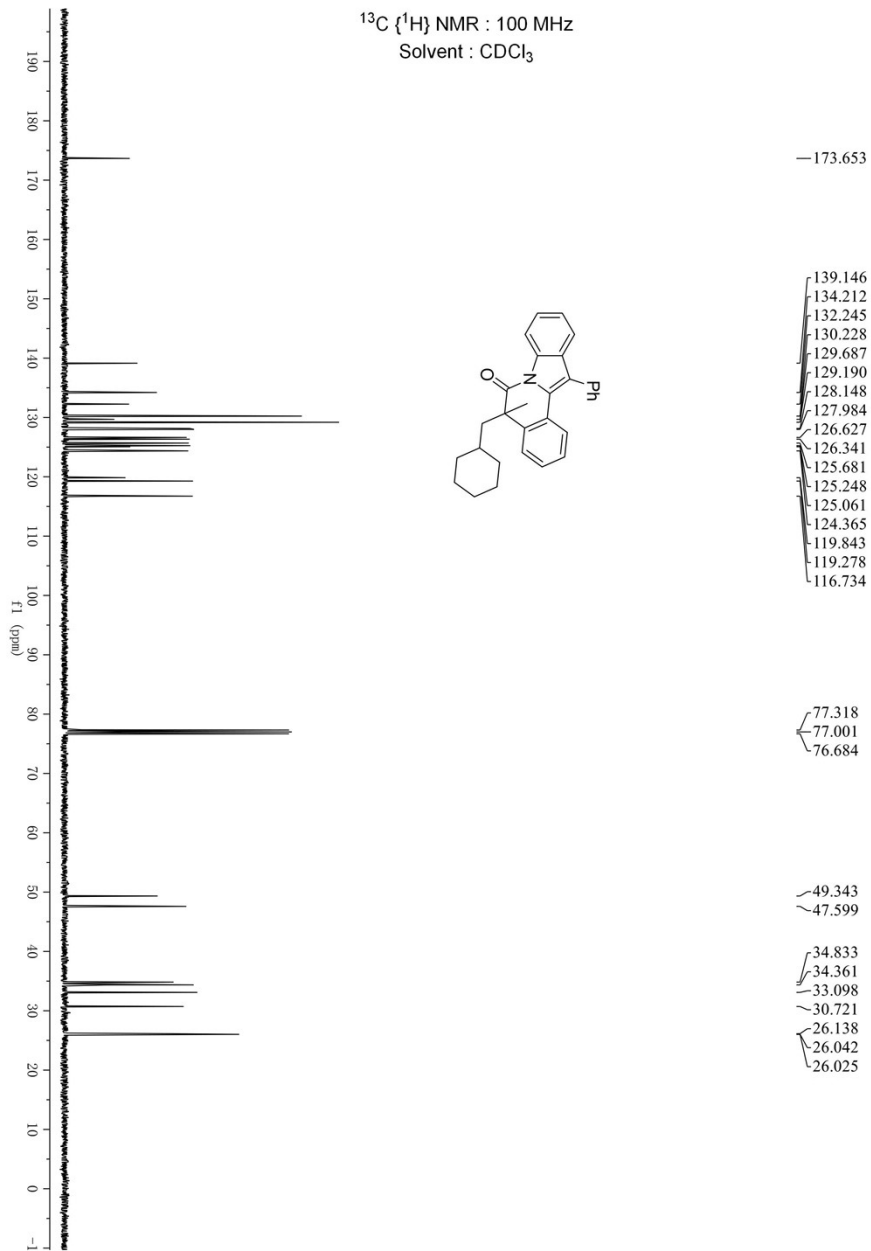

# 5-(Cyclo

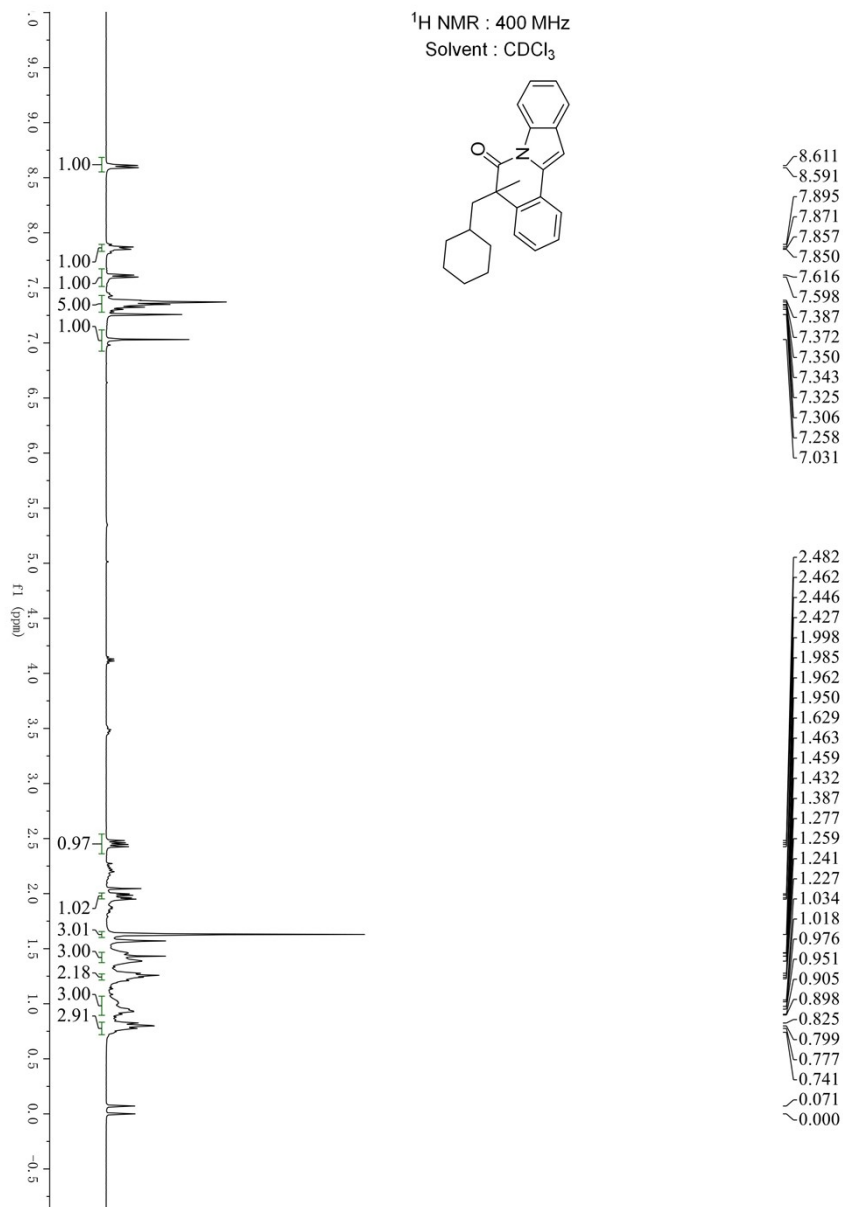

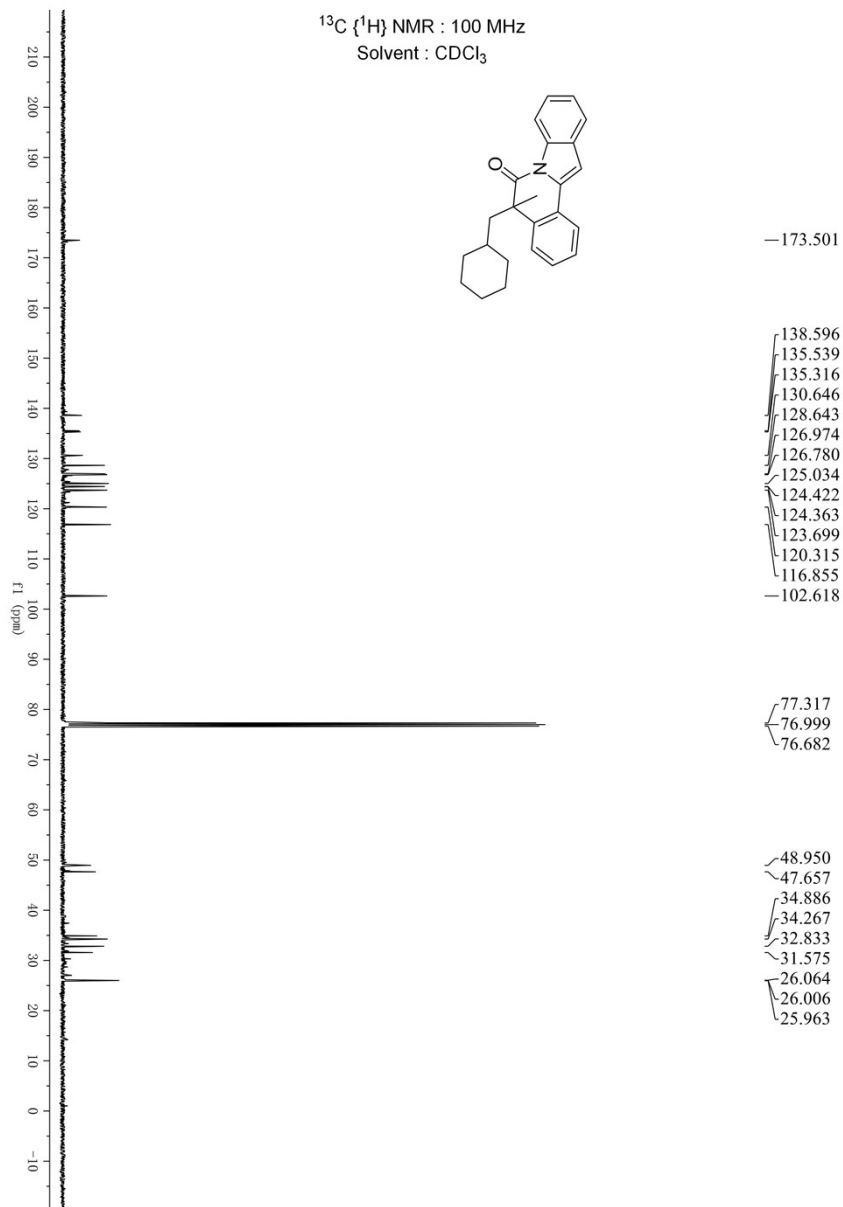

**5-(Cyclohexylmethyl)-3-methoxy-5,10,12-trimethylindolo[2,1-*a*]isoquinolin-6(5*H*)-one (3pa)**

<sup>1</sup>H NMR : 400 MHz  
Solvent : CDCl<sub>3</sub>

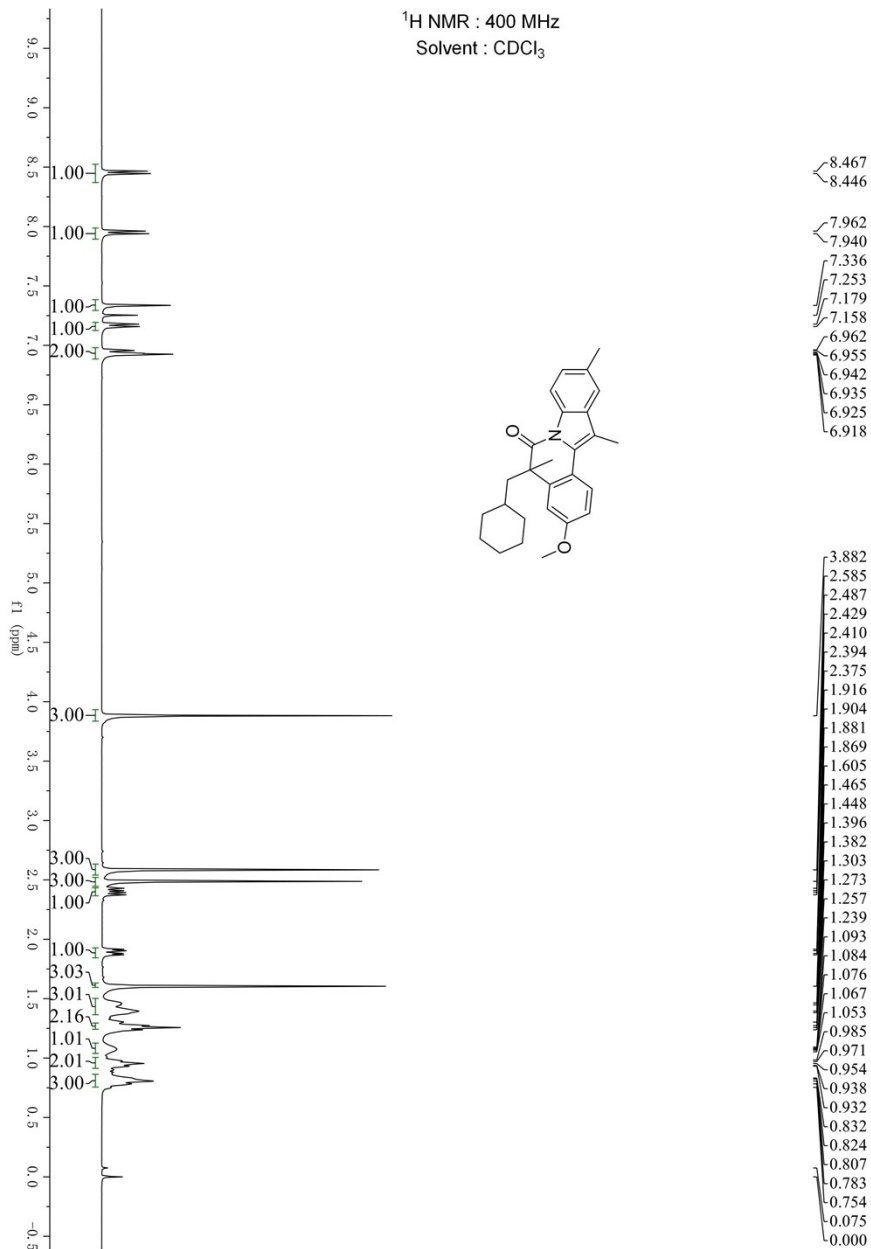

$^{13}\text{C} \{^1\text{H}\}$  NMR : 100 MHz  
Solvent :  $\text{CDCl}_3$

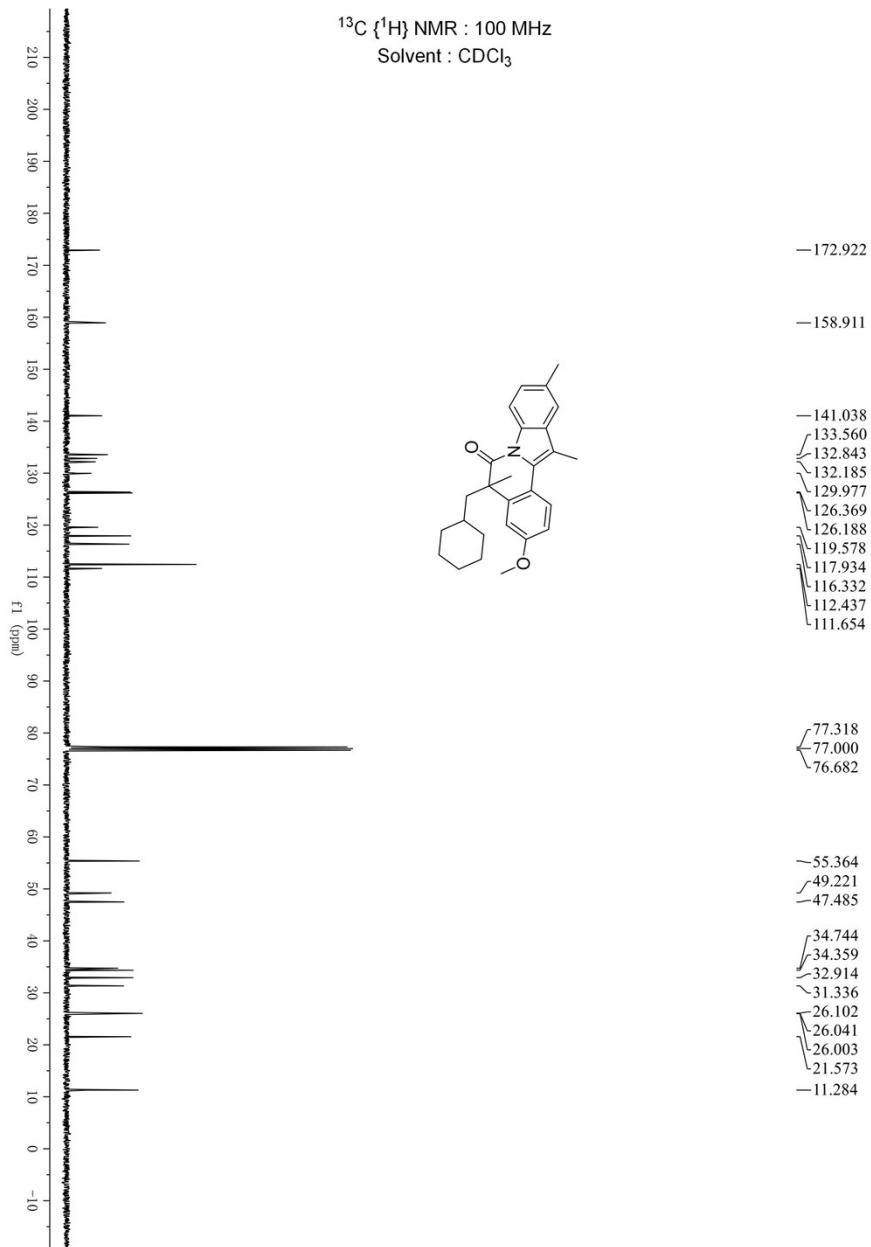

# 5-(Cycl

<sup>1</sup>H NMR : 400 MHz  
Solvent : CDCl<sub>3</sub>

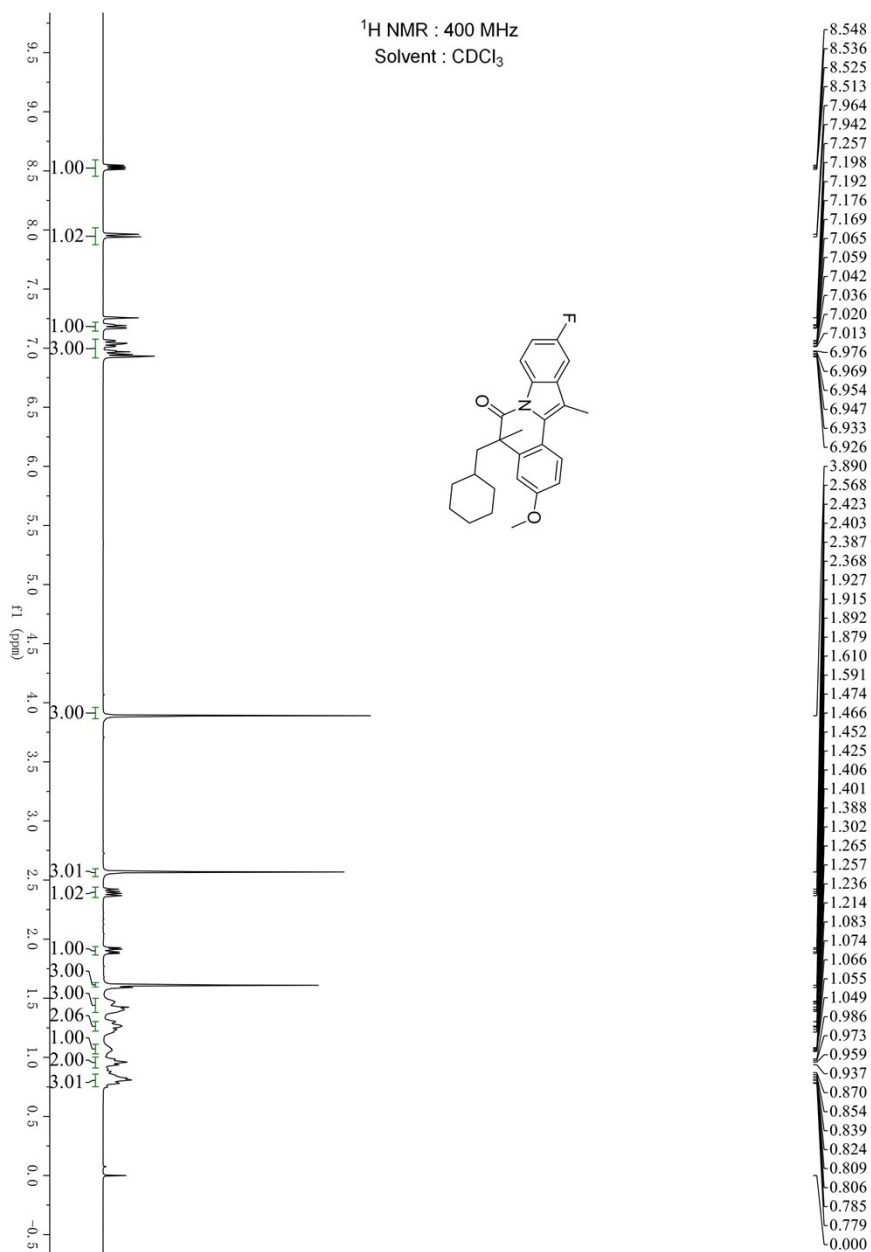

$^{13}\text{C}$  { $^1\text{H}$ } NMR : 100 MHz  
Solvent :  $\text{CDCl}_3$

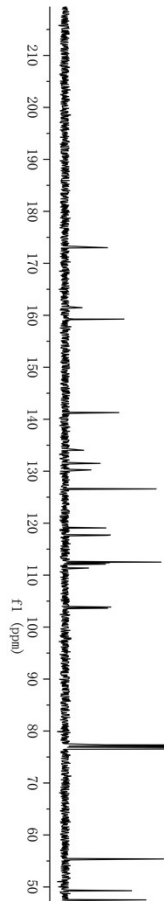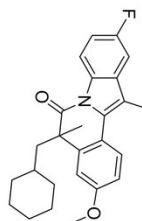

—173.004  
161.461  
159.264  
159.071  
141.271  
134.115  
134.021  
131.496  
130.247  
126.589  
119.079  
117.727  
117.639  
112.549  
112.507  
112.354  
112.109  
111.359  
111.319  
103.860  
103.620  
77.317  
77.000  
76.682  
55.385  
49.269  
47.512

$^{19}\text{F}$  NMR : 282 MHz  
Solvent :  $\text{CDCl}_3$

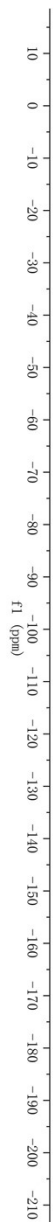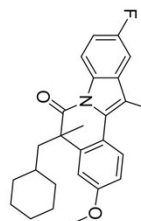

—118.573





# 10-Chlc

<sup>1</sup>H NMR : 400 MHz  
Solvent : CDCl<sub>3</sub>

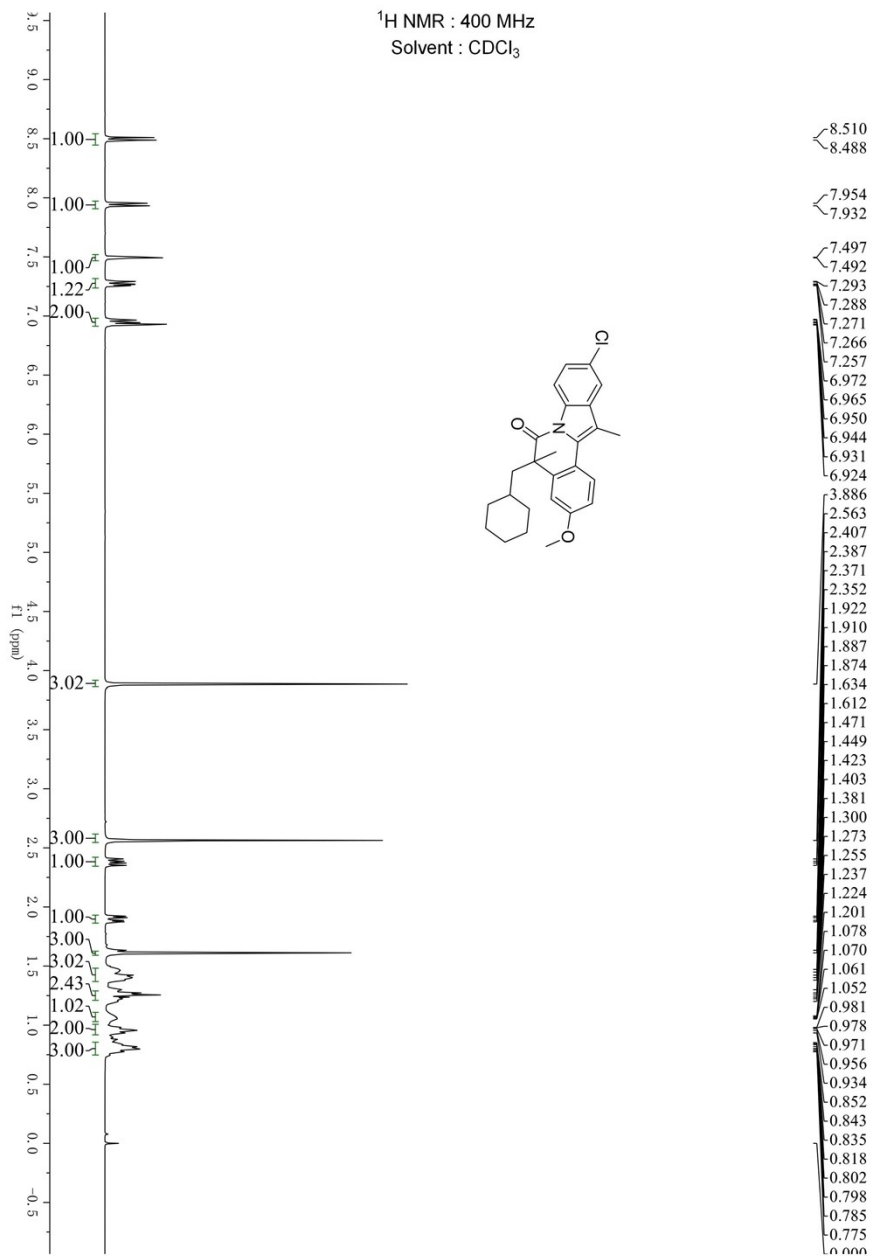

$^{13}\text{C}$   $\{^1\text{H}\}$  NMR : 100 MHz  
Solvent :  $\text{CDCl}_3$

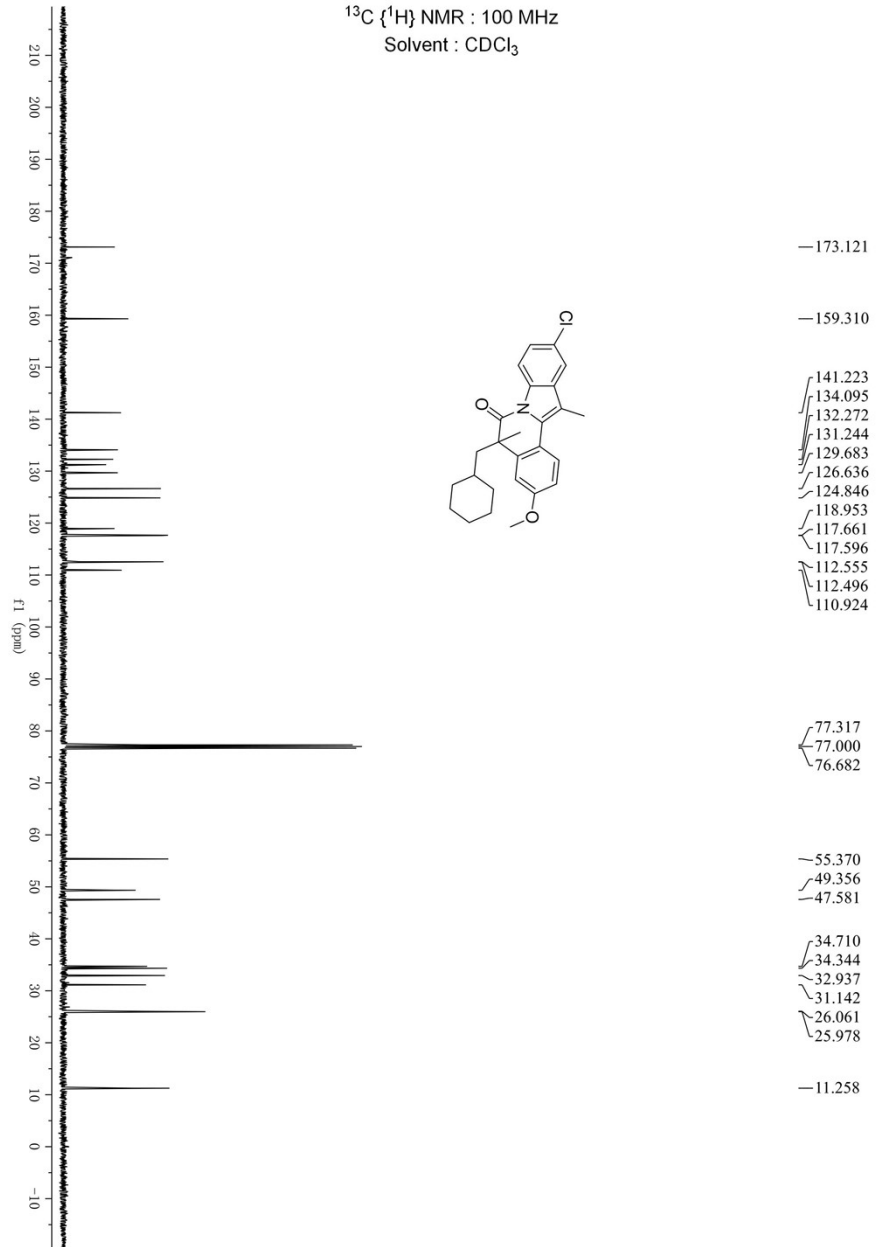

# 5-(Cyclohexy

<sup>1</sup>H NMR : 400 MHz  
Solvent : CDCl<sub>3</sub>

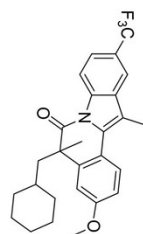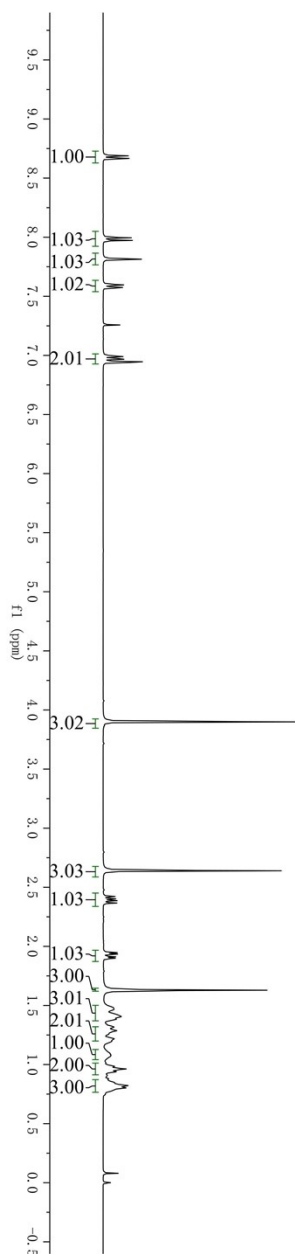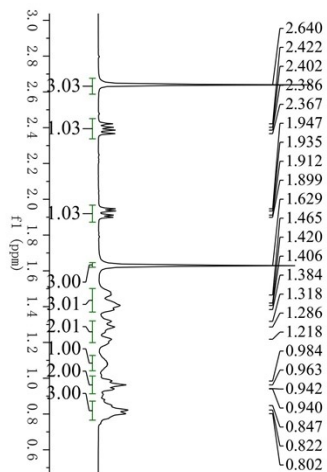

$^{13}\text{C}$   $\{^1\text{H}\}$  NMR : 100 MHz  
Solvent :  $\text{CDCl}_3$

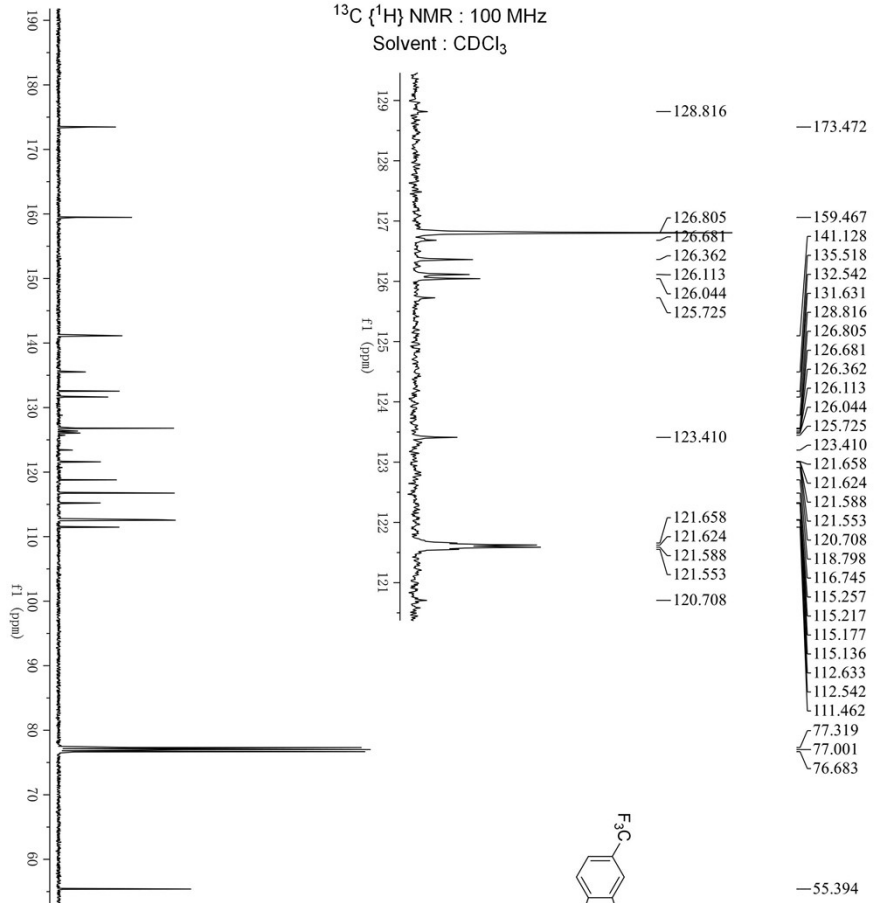

$^{19}\text{F}$  NMR : 282 MHz  
Solvent :  $\text{CDCl}_3$

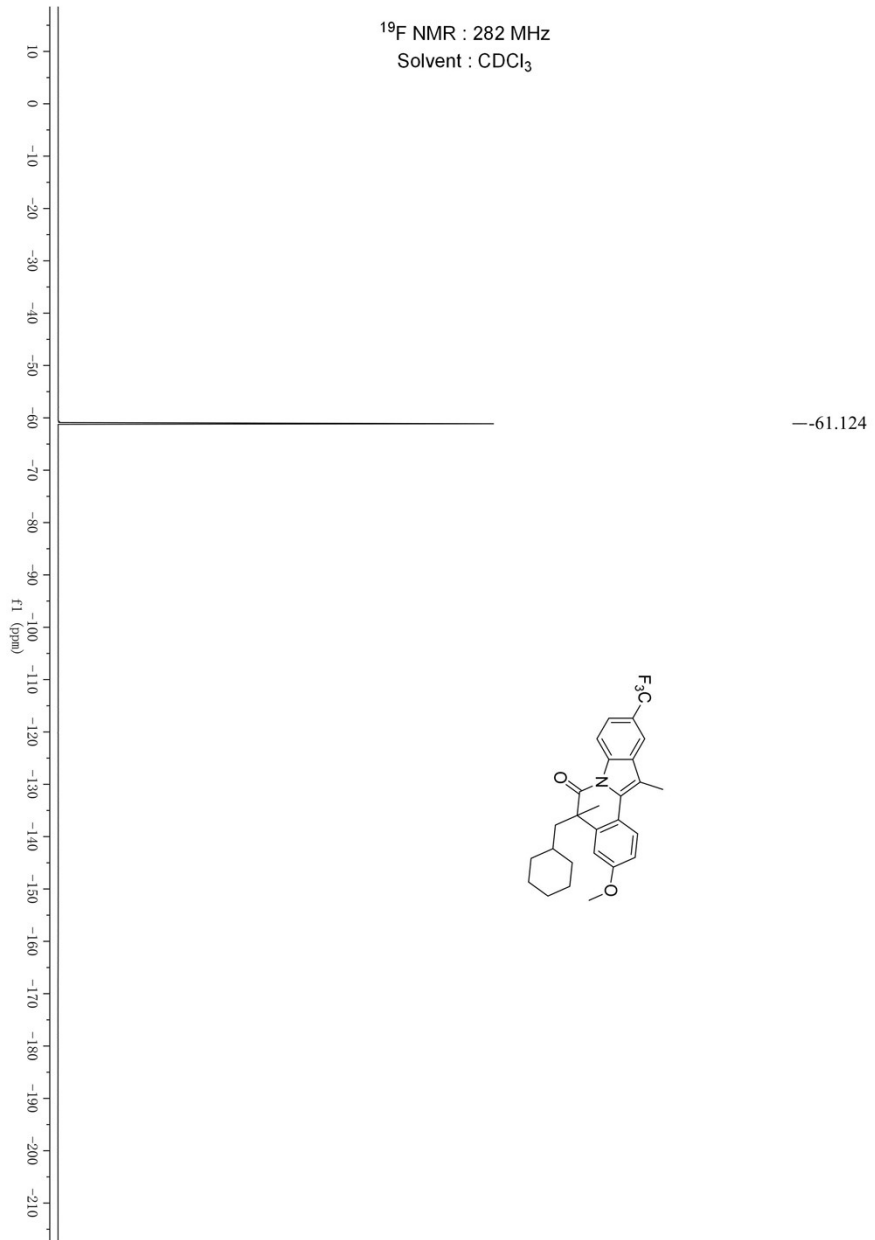



# 5-(Cyclohex

$^1\text{H NMR}$  : 400 MHz  
Solvent :  $\text{CDCl}_3$

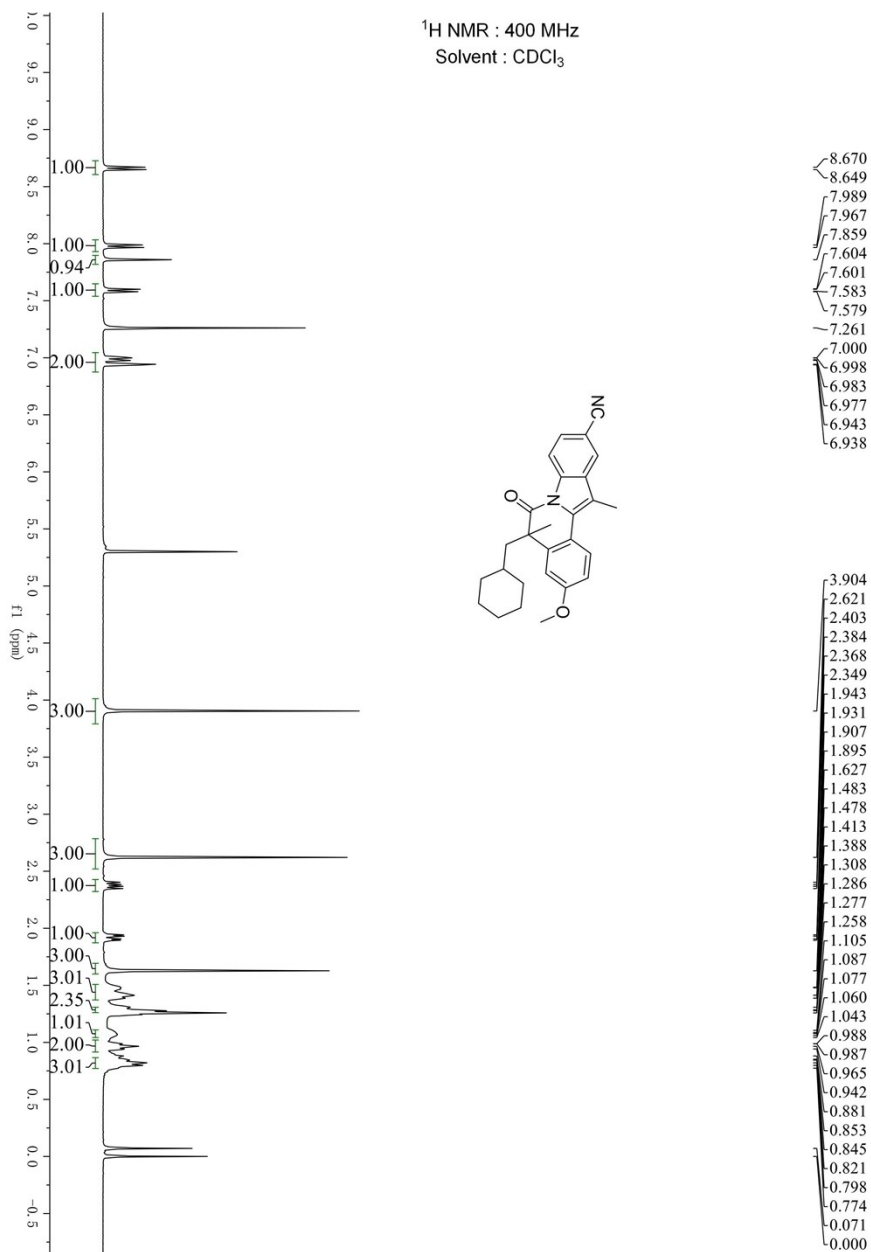

$^{13}\text{C} \{^1\text{H}\}$  NMR : 100 MHz  
Solvent :  $\text{CDCl}_3$

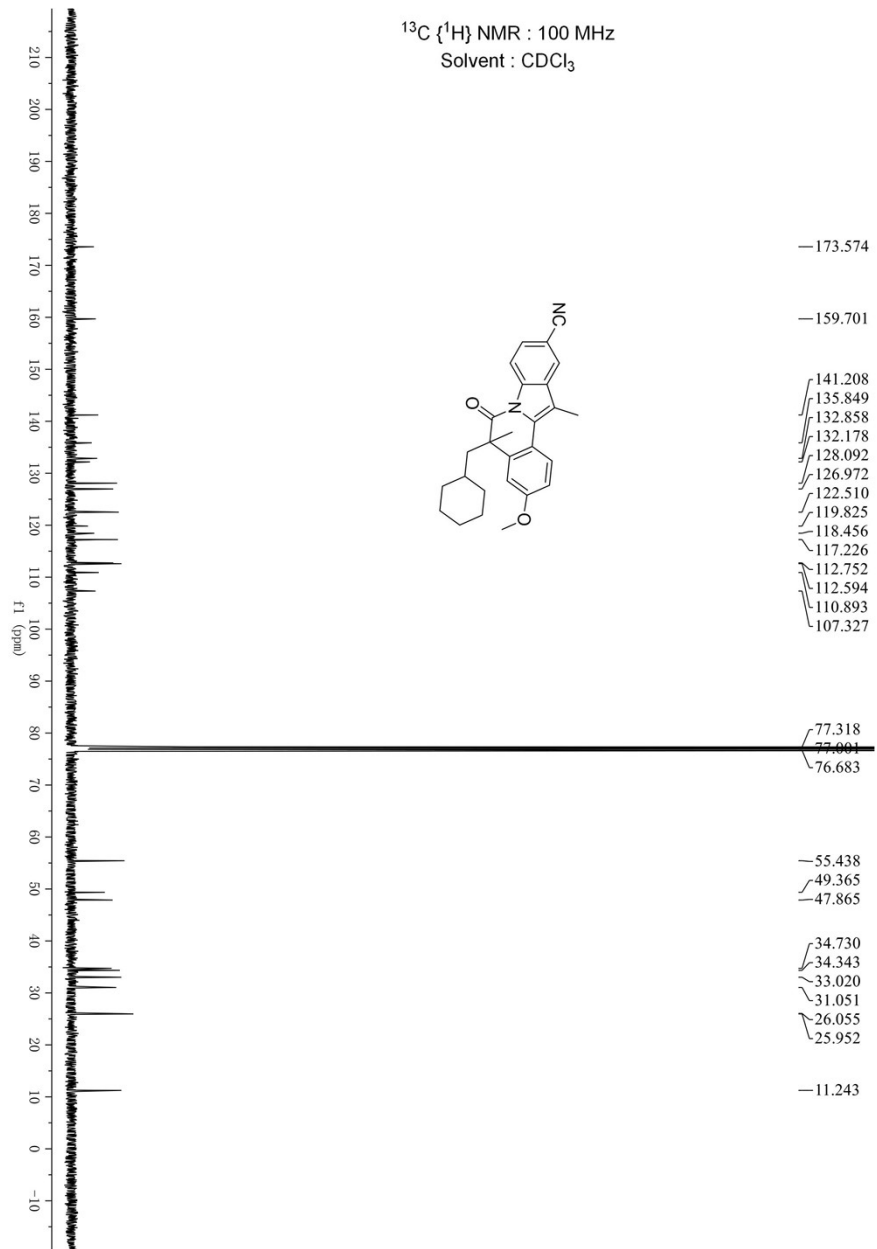



# 5-(Cyclohexy

<sup>1</sup>H NMR : 400 MHz  
Solvent : CDCl<sub>3</sub>

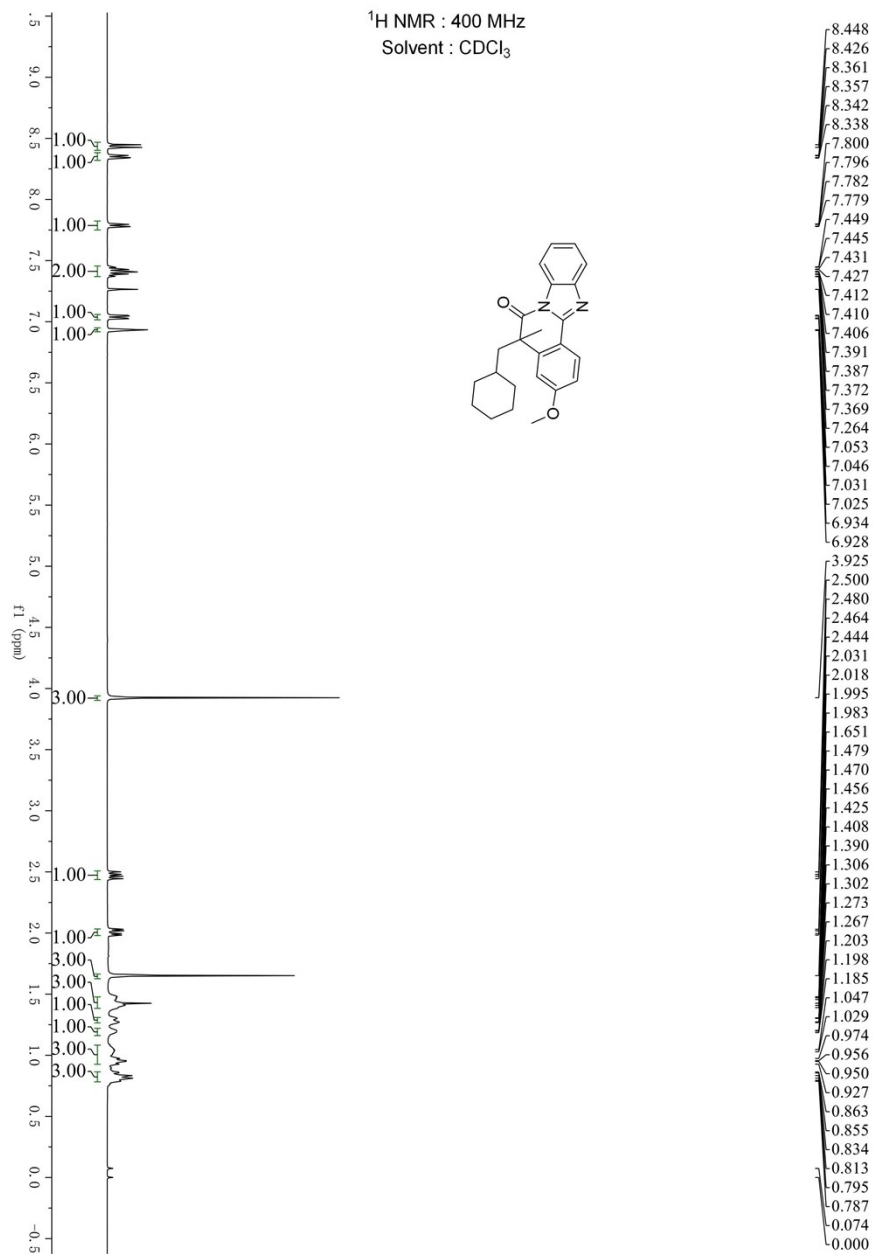

$^{13}\text{C} \{^1\text{H}\}$  NMR : 100 MHz

Solvent :  $\text{CDCl}_3$

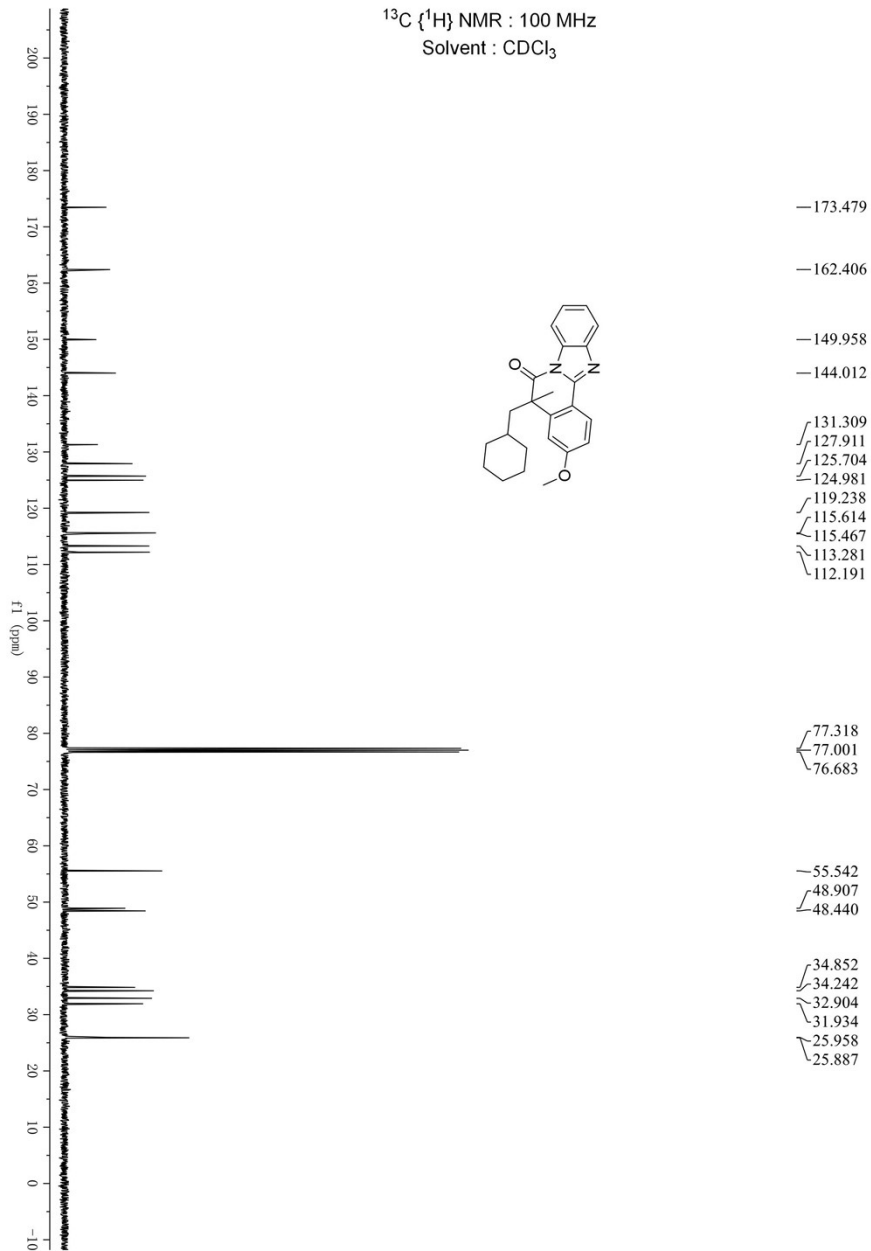

# 5-(Cyclohex

<sup>1</sup>H NMR : 400 MHz  
Solvent : CDCl<sub>3</sub>

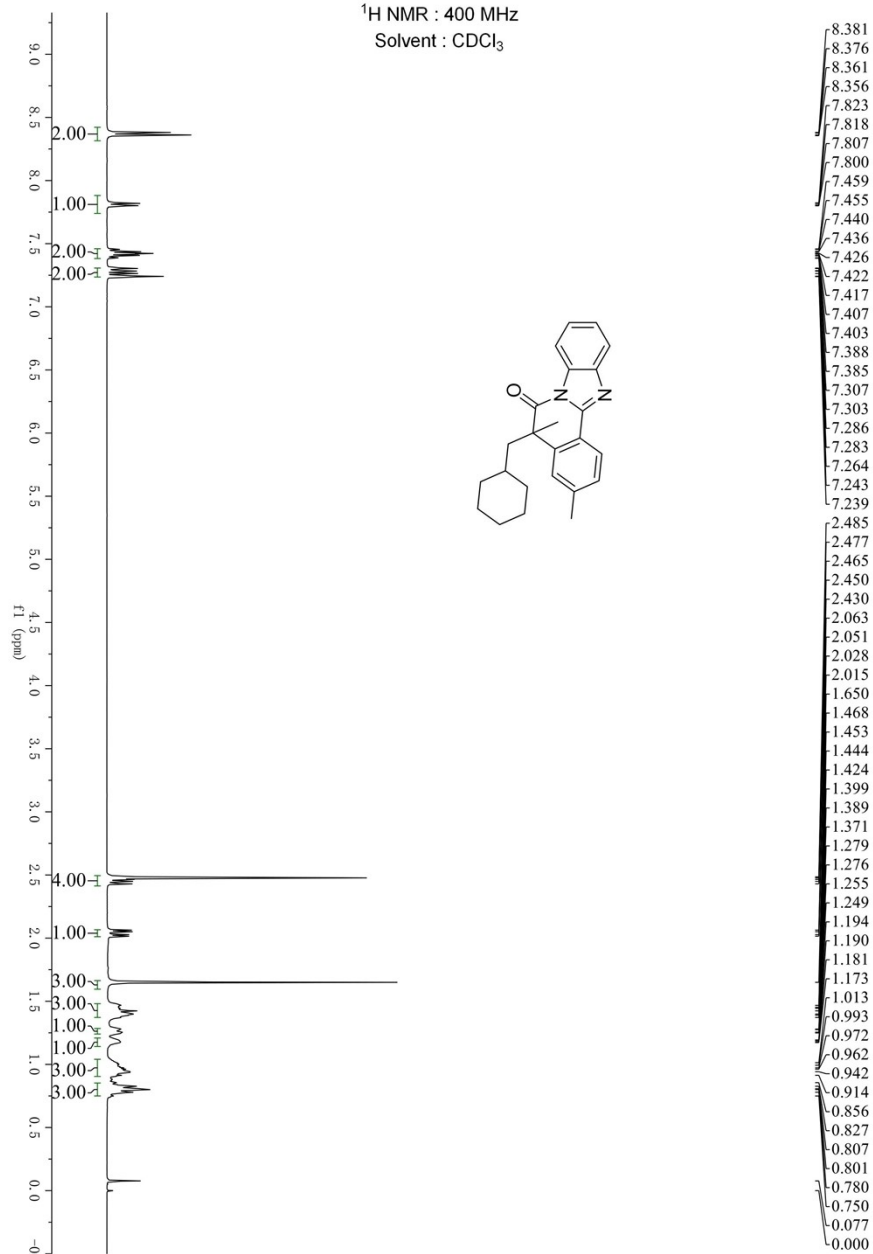

$^{13}\text{C}$   $\{^1\text{H}\}$  NMR : 100 MHz  
Solvent :  $\text{CDCl}_3$

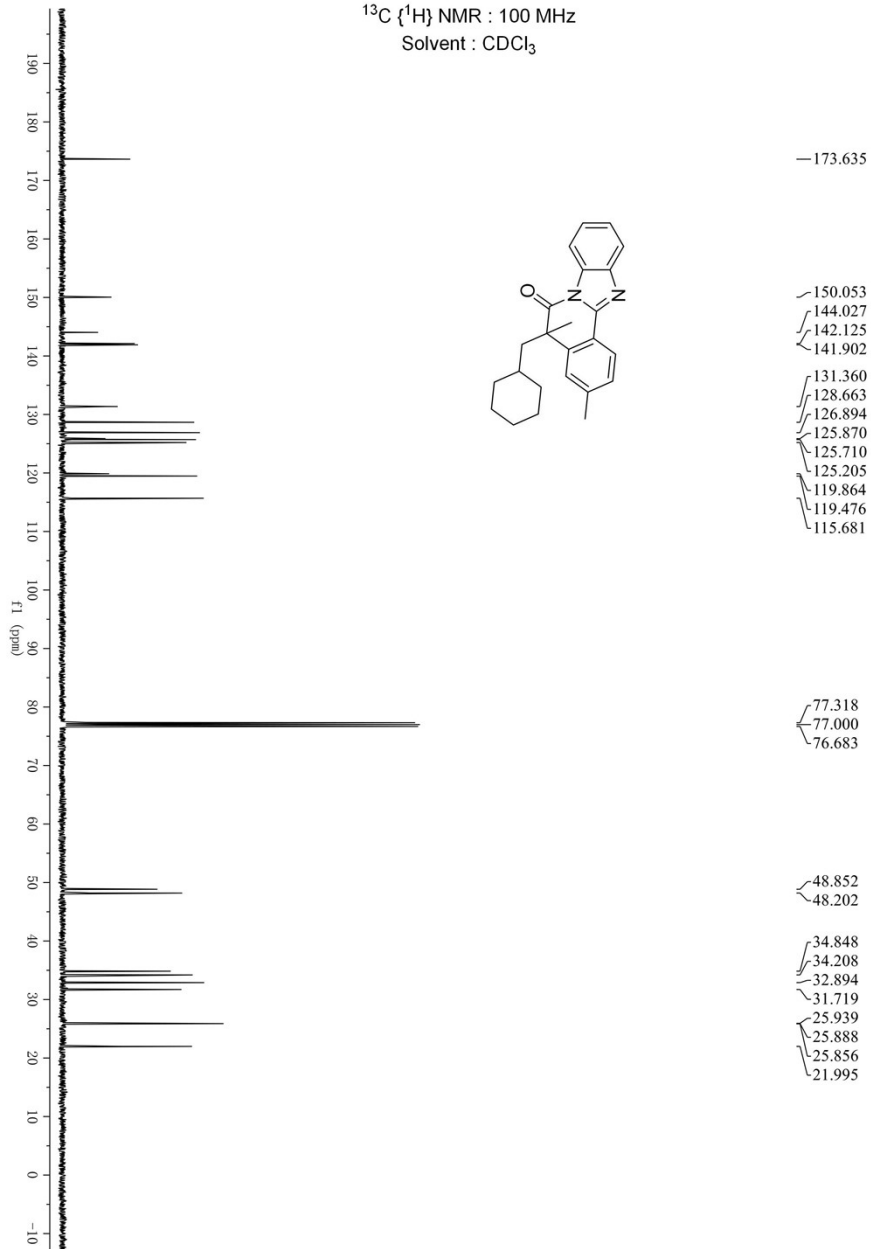

5-(Cyclohe

<sup>1</sup>H NMR : 400 MHz  
Solvent : CDCl<sub>3</sub>

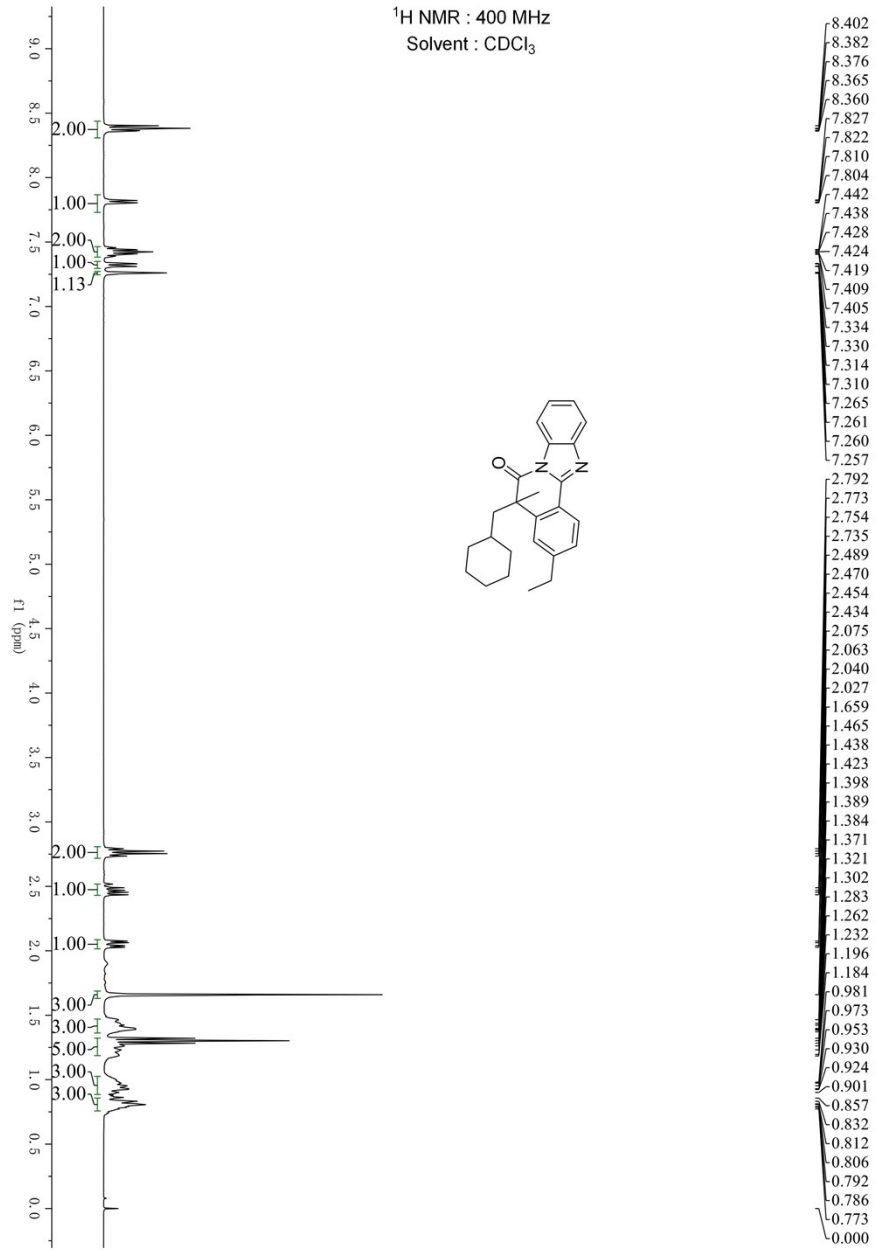

$^{13}\text{C} \{^1\text{H}\}$  NMR : 100 MHz  
Solvent :  $\text{CDCl}_3$

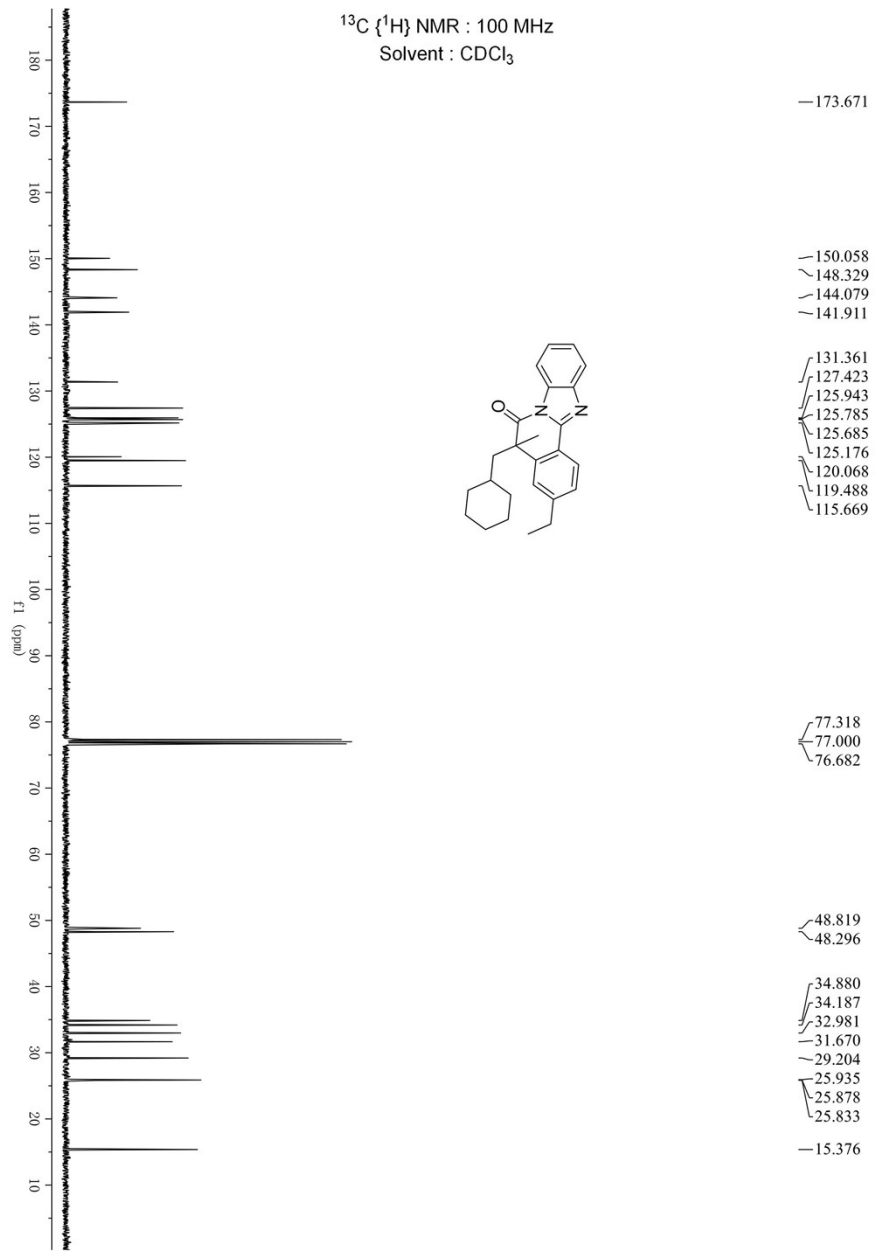

# 5-(Cyclohexy

<sup>1</sup>H NMR : 400 MHz  
Solvent : CDCl<sub>3</sub>

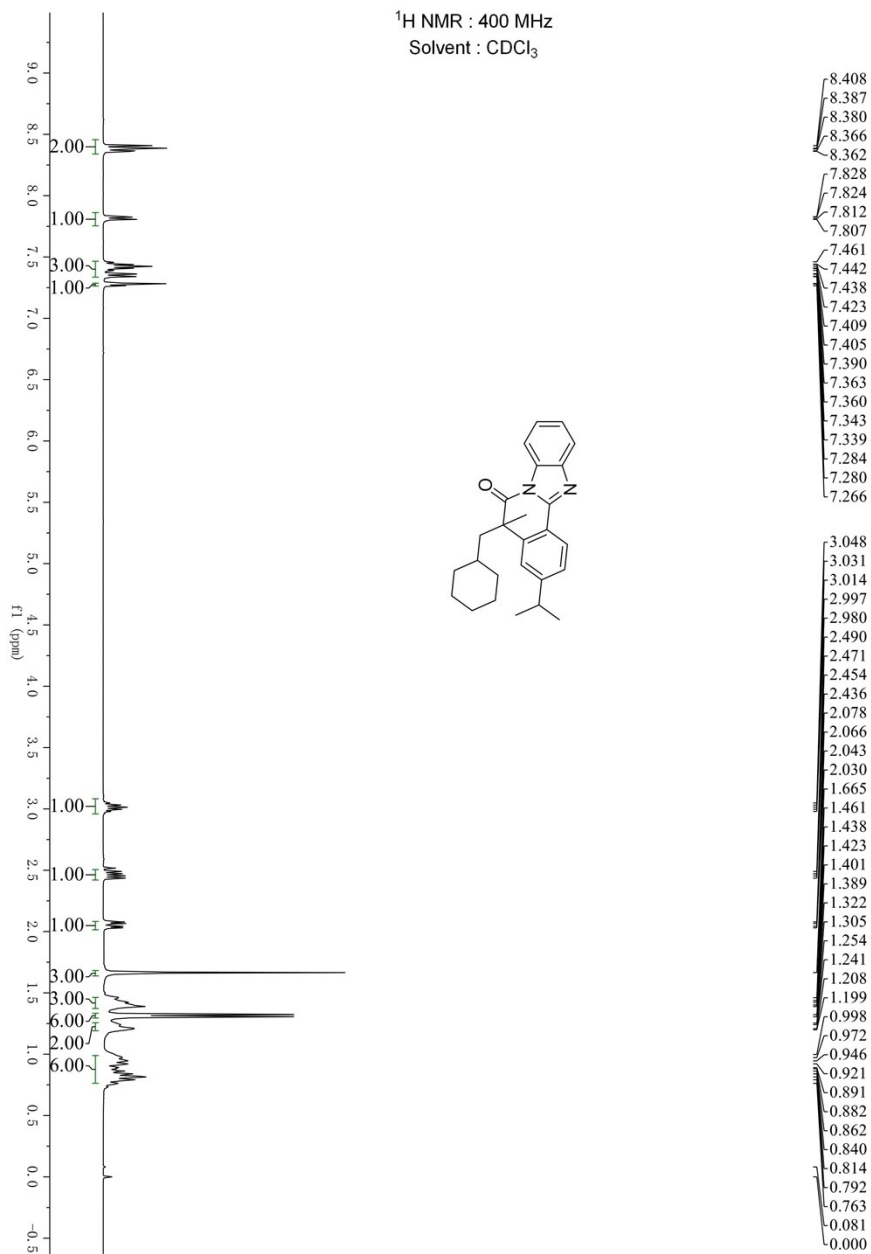

$^{13}\text{C}$  ( $^1\text{H}$ ) NMR : 100 MHz  
Solvent :  $\text{CDCl}_3$

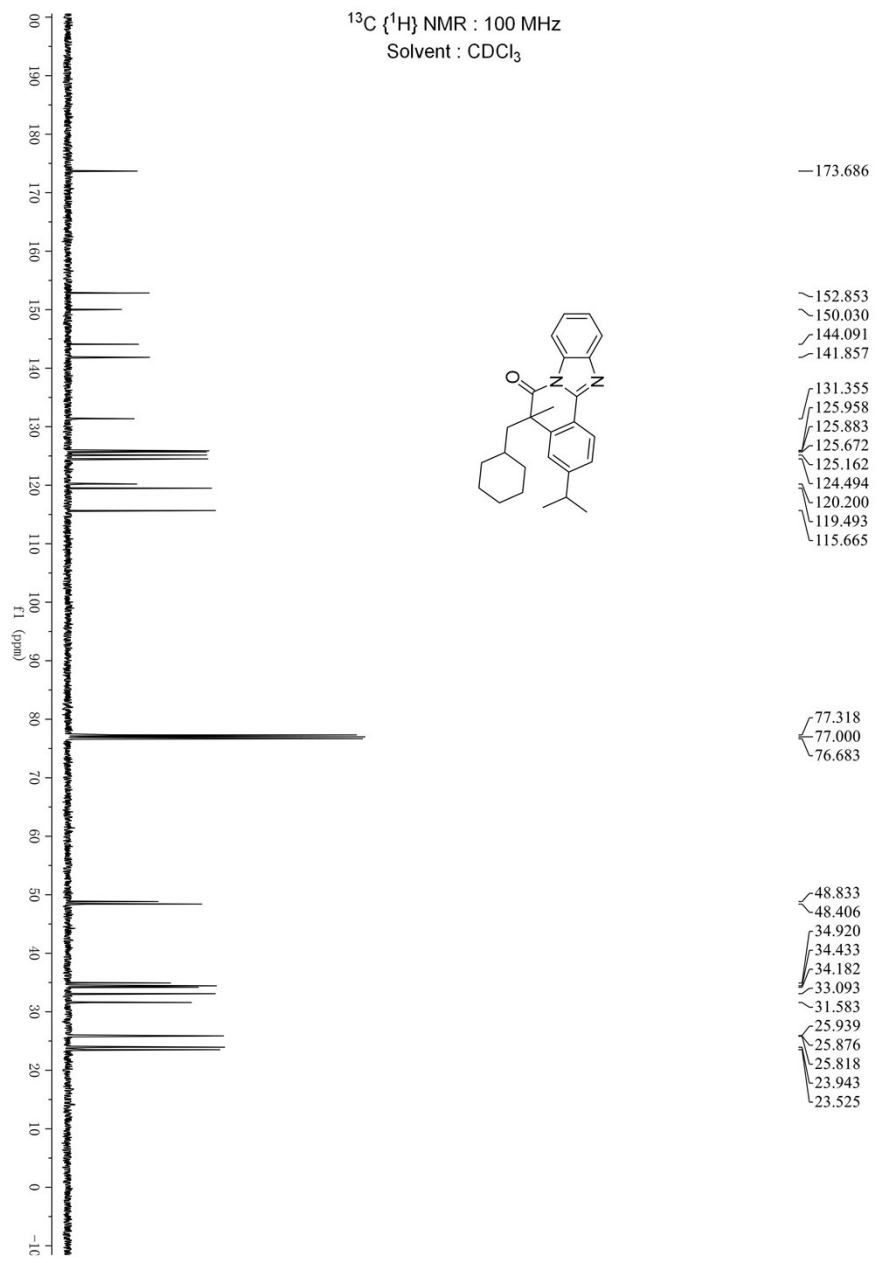



# 5-(Cyclohex

$^1\text{H NMR}$  : 400 MHz  
Solvent :  $\text{CDCl}_3$

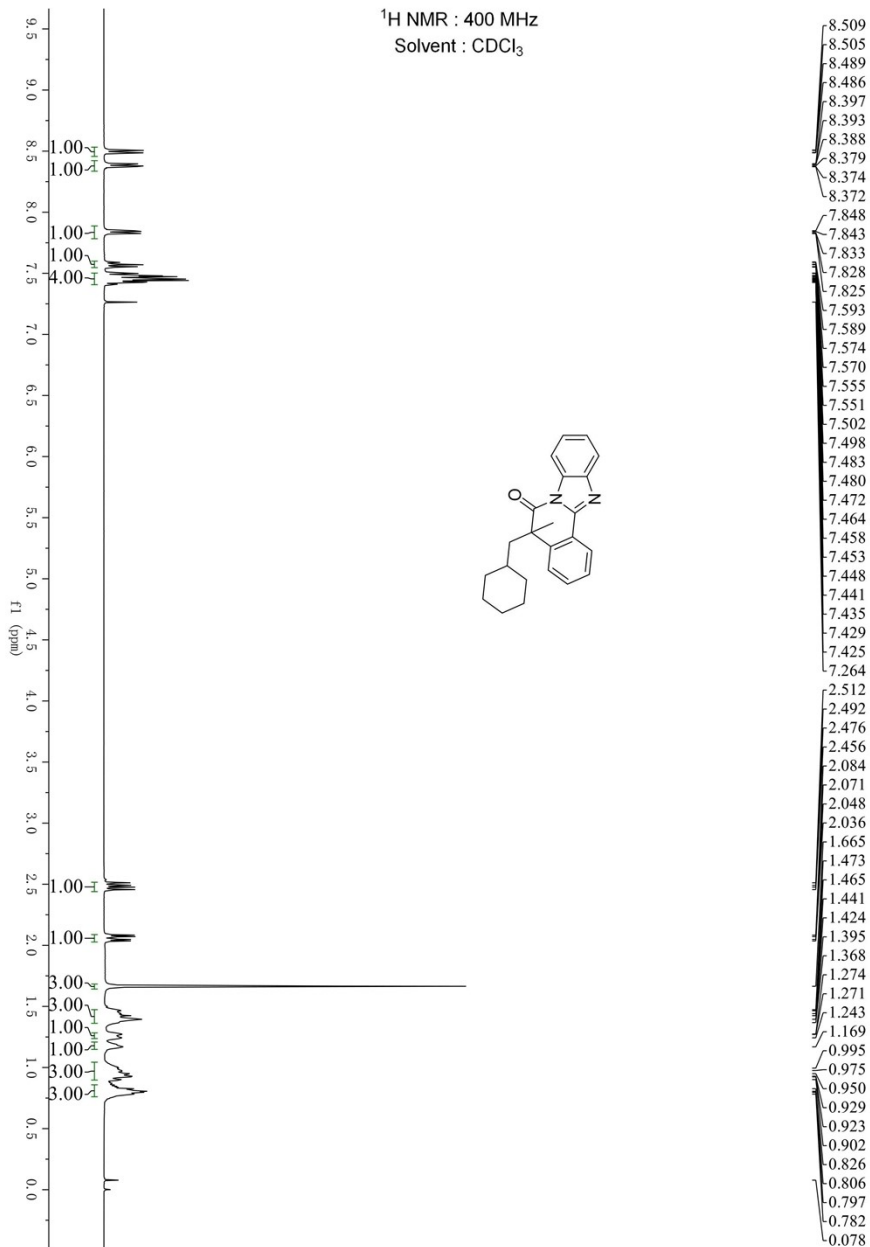

$^{13}\text{C} \{^1\text{H}\}$  NMR : 100 MHz  
Solvent :  $\text{CDCl}_3$

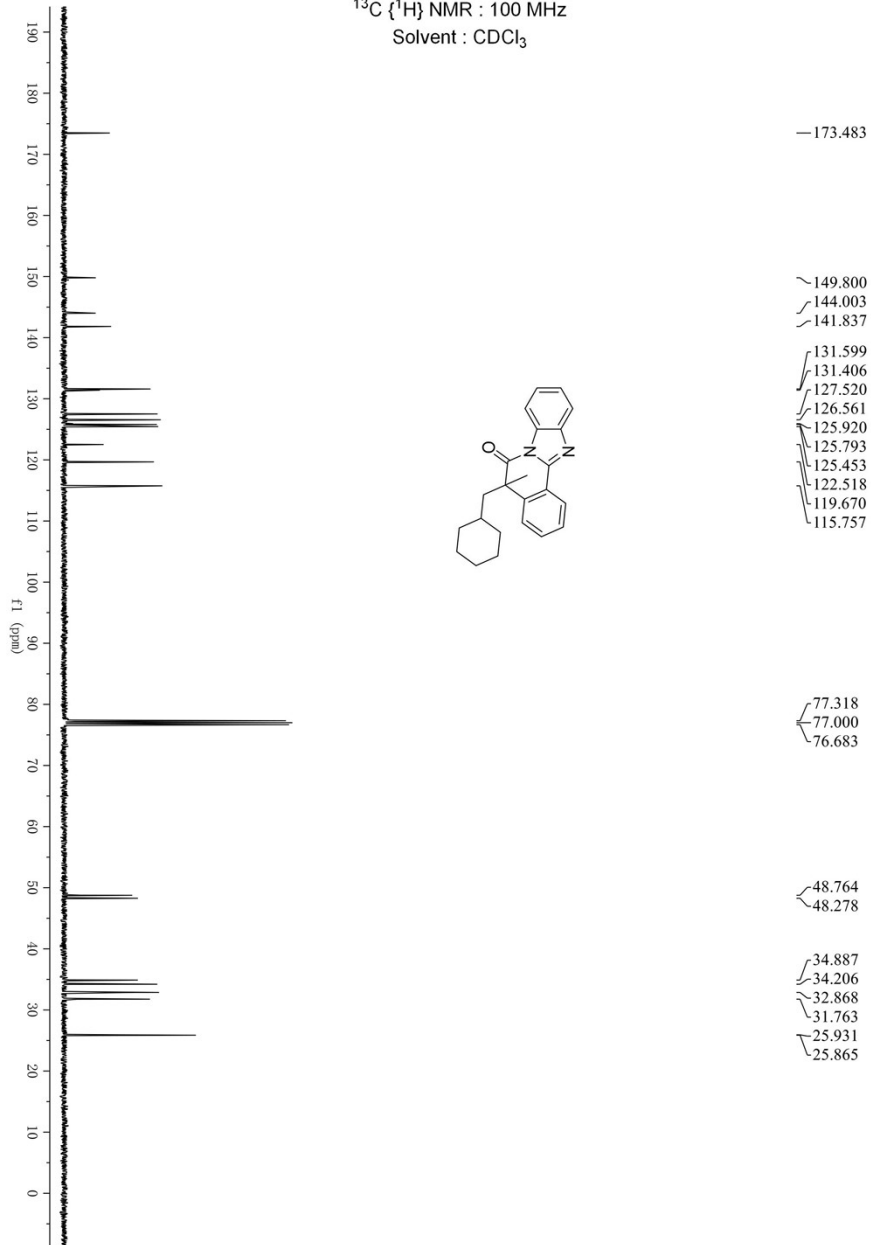

5-(Cyclohex

<sup>1</sup>H NMR : 400 MHz  
Solvent : CDCl<sub>3</sub>

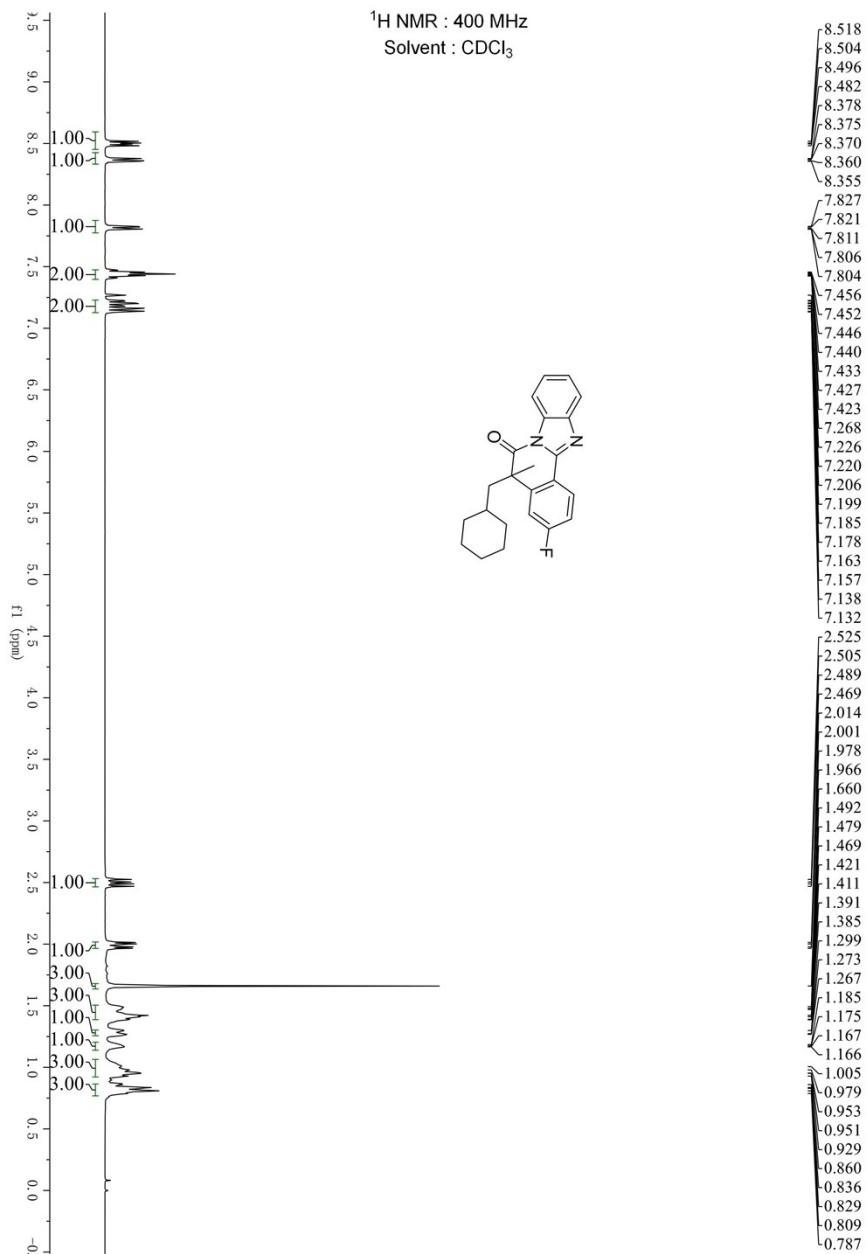

$^{13}\text{C}$  { $^1\text{H}$ } NMR : 100 MHz

Solvent :  $\text{CDCl}_3$

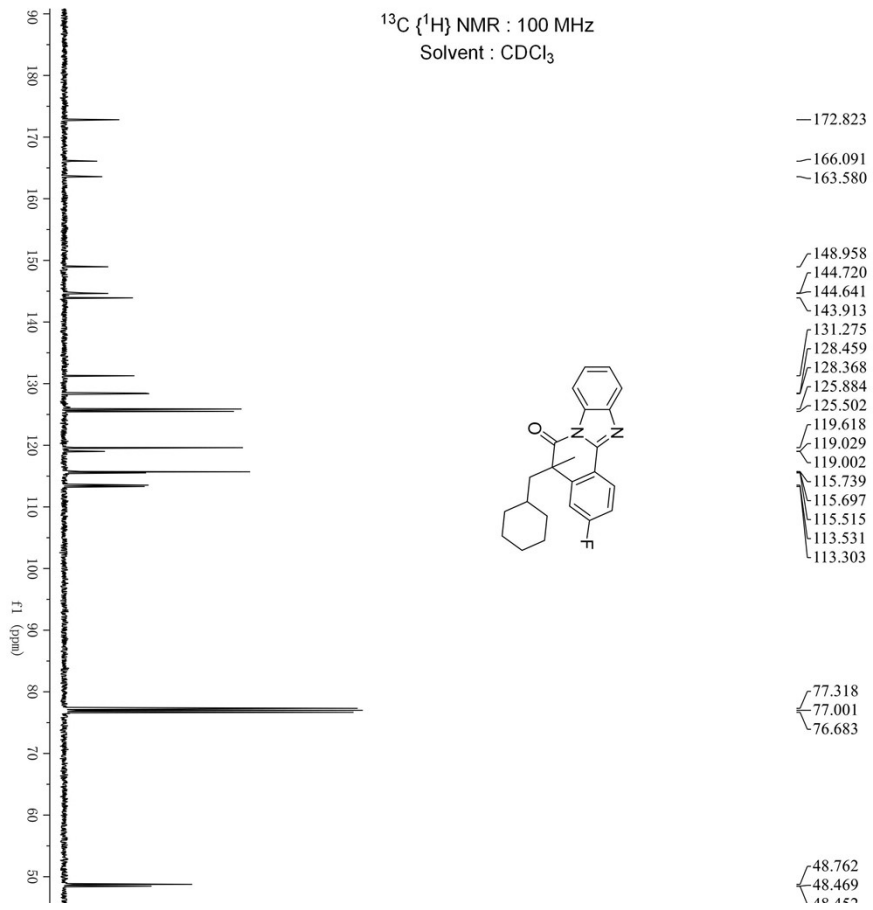

$^{19}\text{F}$  NMR : 282 MHz

Solvent :  $\text{CDCl}_3$

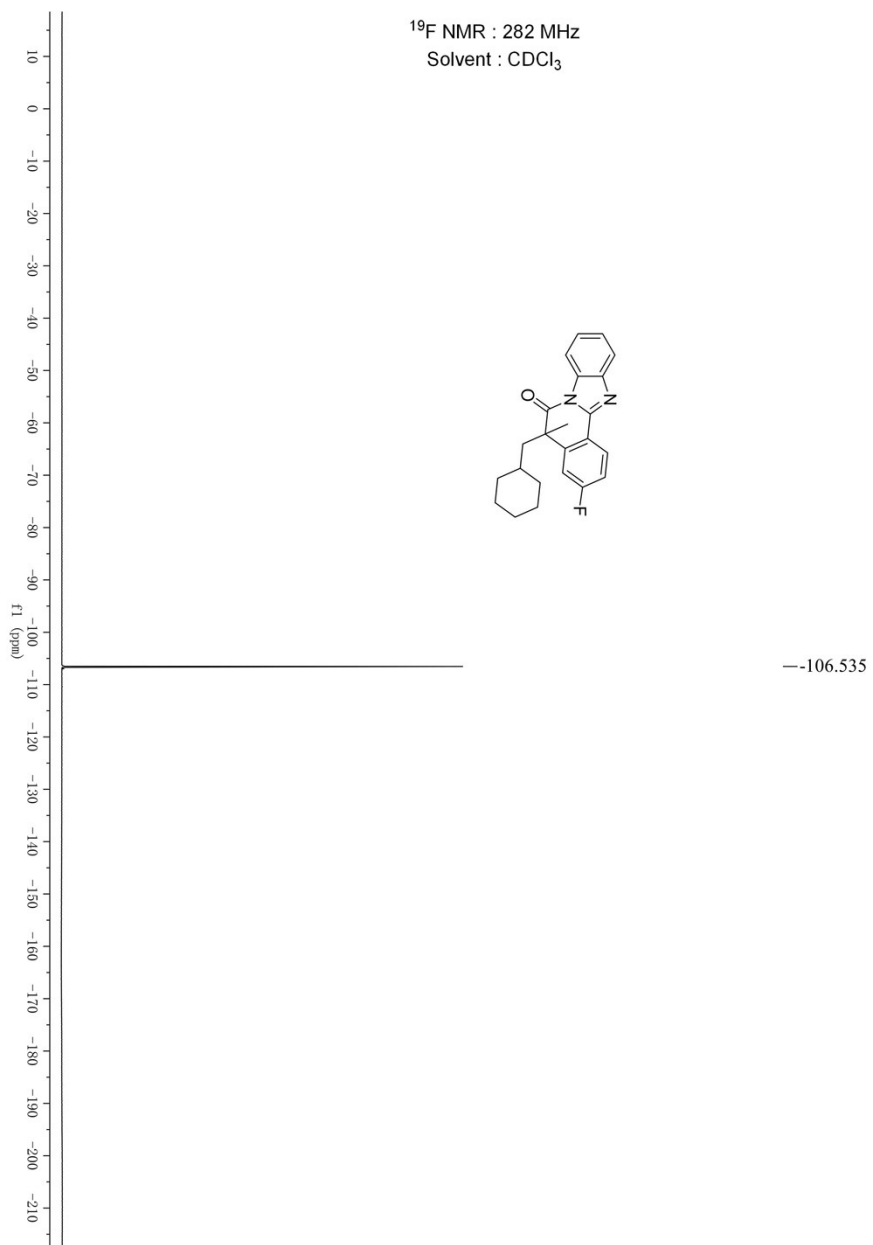



# 3-Chloro-5-

<sup>1</sup>H NMR : 400 MHz  
Solvent : CDCl<sub>3</sub>

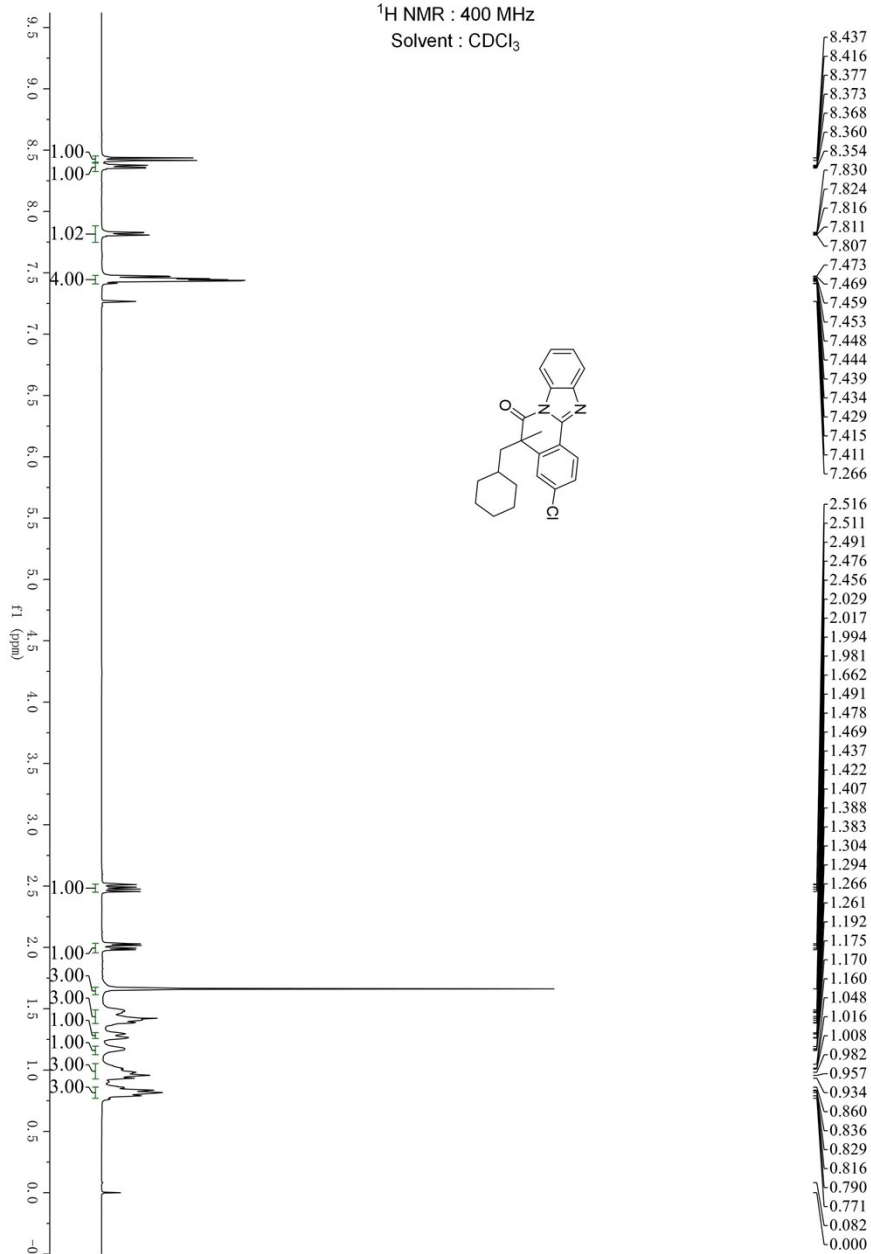

$^{13}\text{C}$   $\{^1\text{H}\}$  NMR : 100 MHz  
Solvent :  $\text{CDCl}_3$

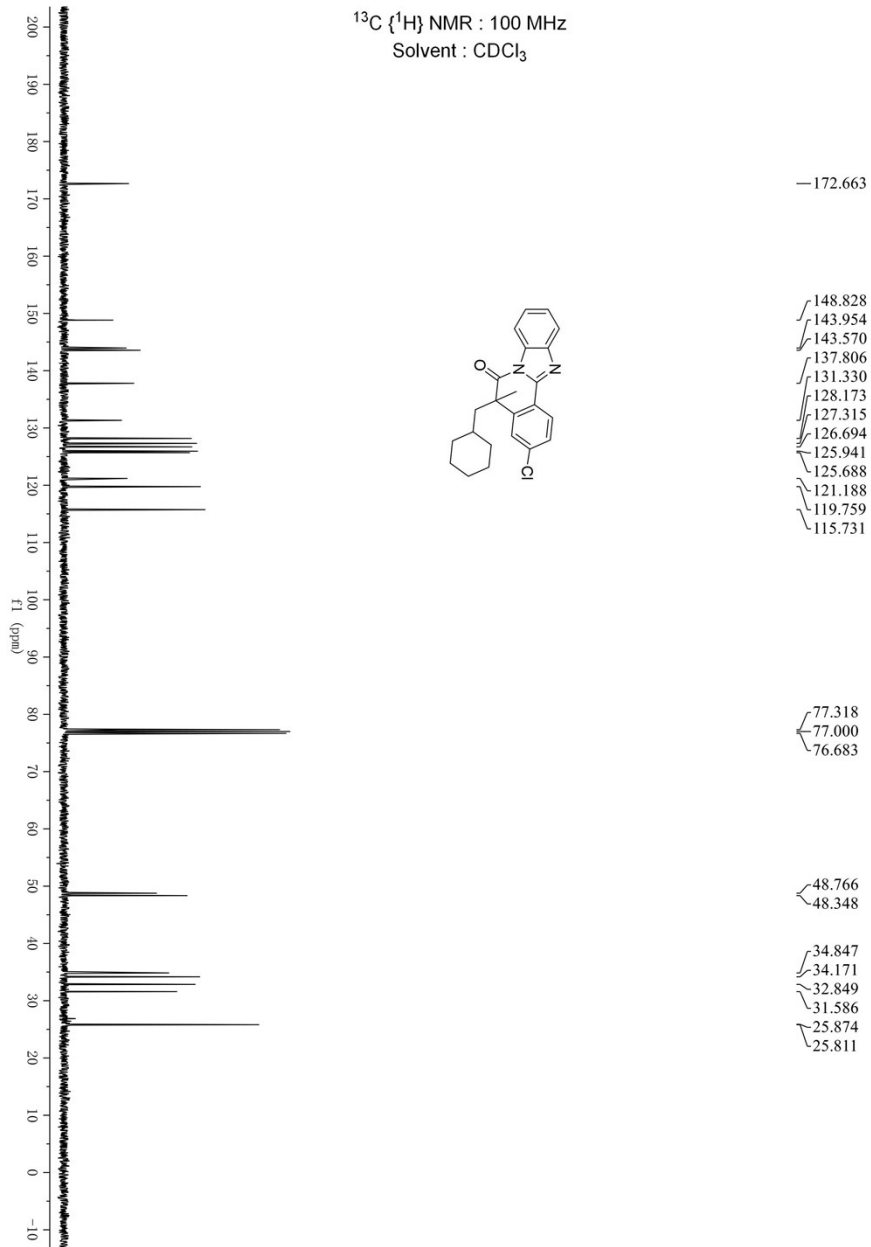

### 3-Bromo-5-

$^1\text{H NMR}$  : 400 MHz  
Solvent :  $\text{CDCl}_3$

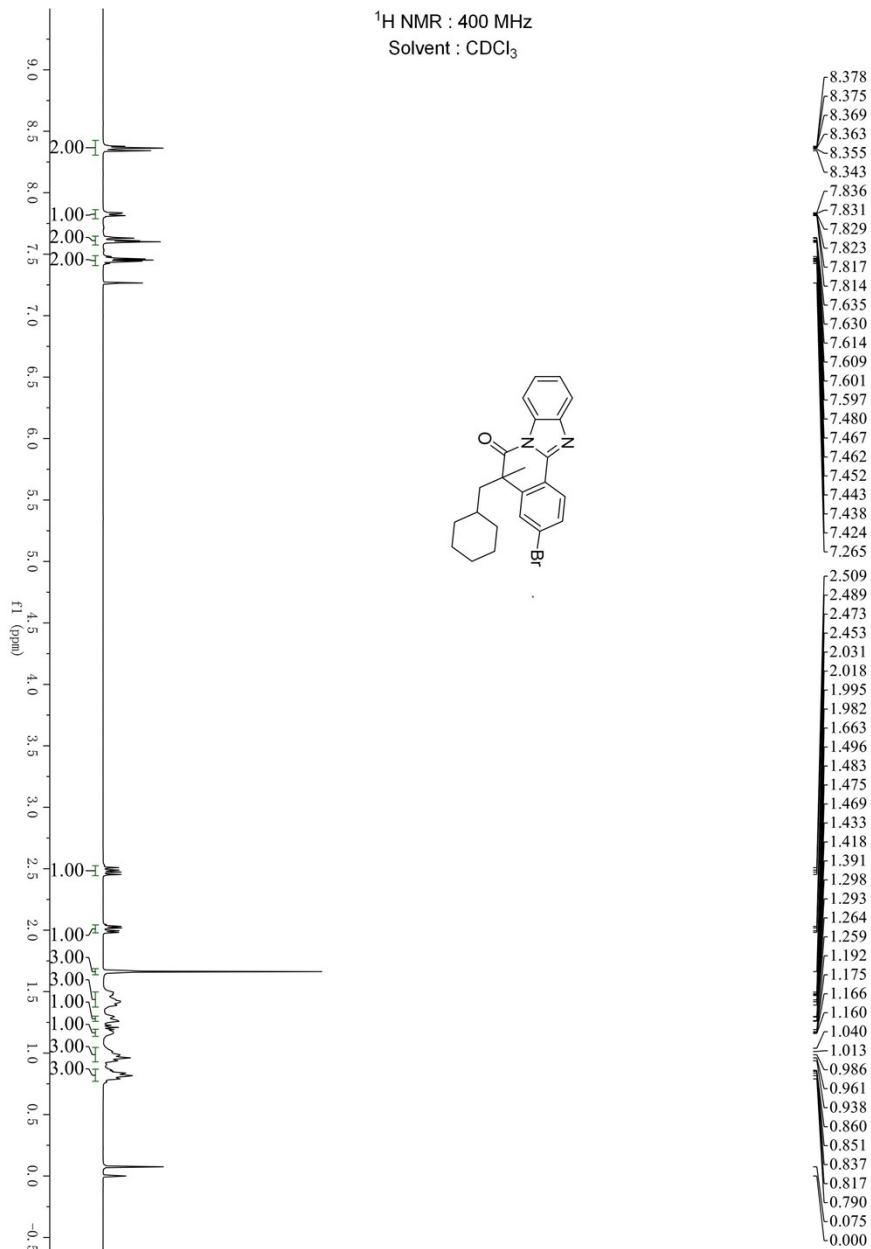



$^{13}\text{C}$   $\{^1\text{H}\}$  NMR : 100 MHz  
Solvent :  $\text{CDCl}_3$

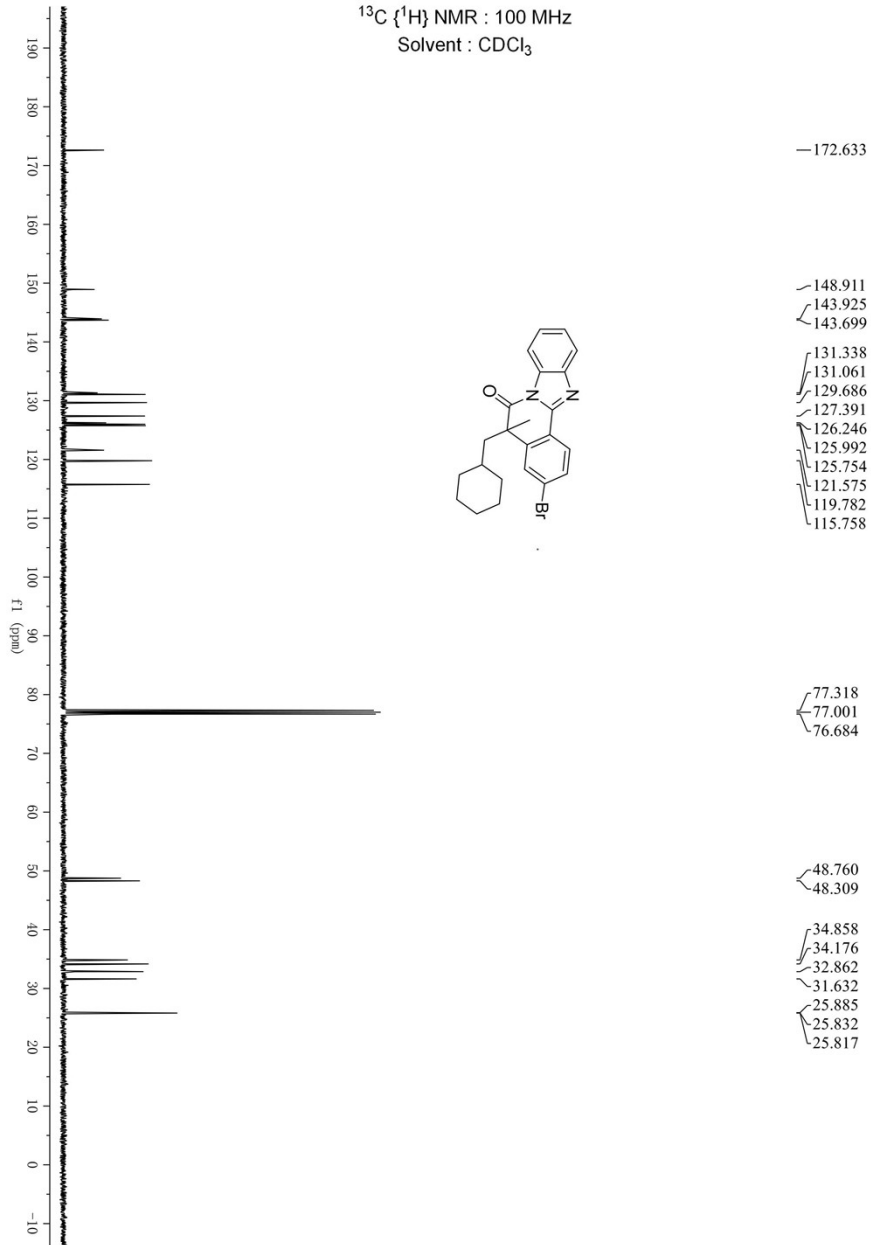

# 5-(Cyclohexylmethyl)-1-(4-(trifluoromethyl)phenyl)-1H-imidazole-2(1H)-one

$^1\text{H NMR}$  : 400 MHz  
Solvent :  $\text{CDCl}_3$

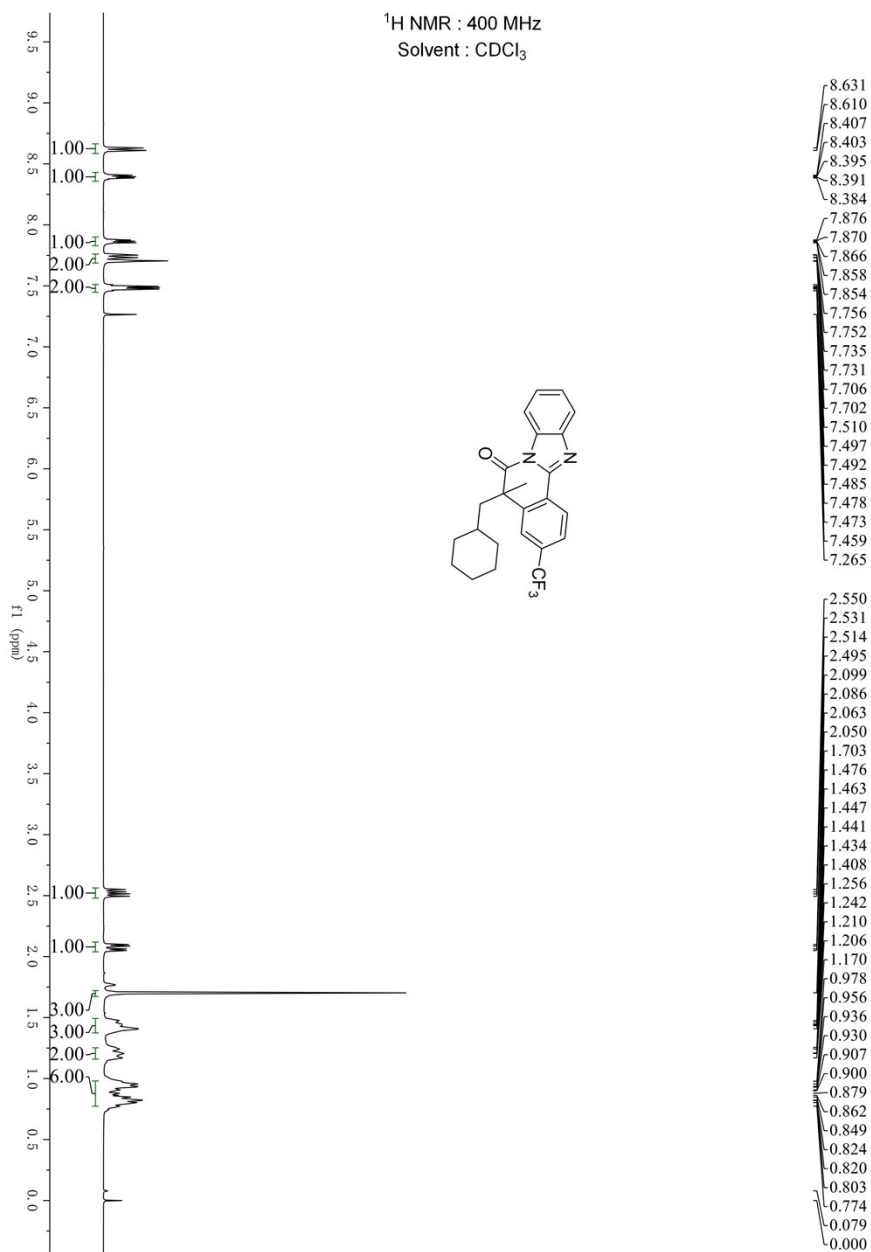

<sup>13</sup>C {<sup>1</sup>H} NMR : 100 MHz

Solvent : CDCl<sub>3</sub>

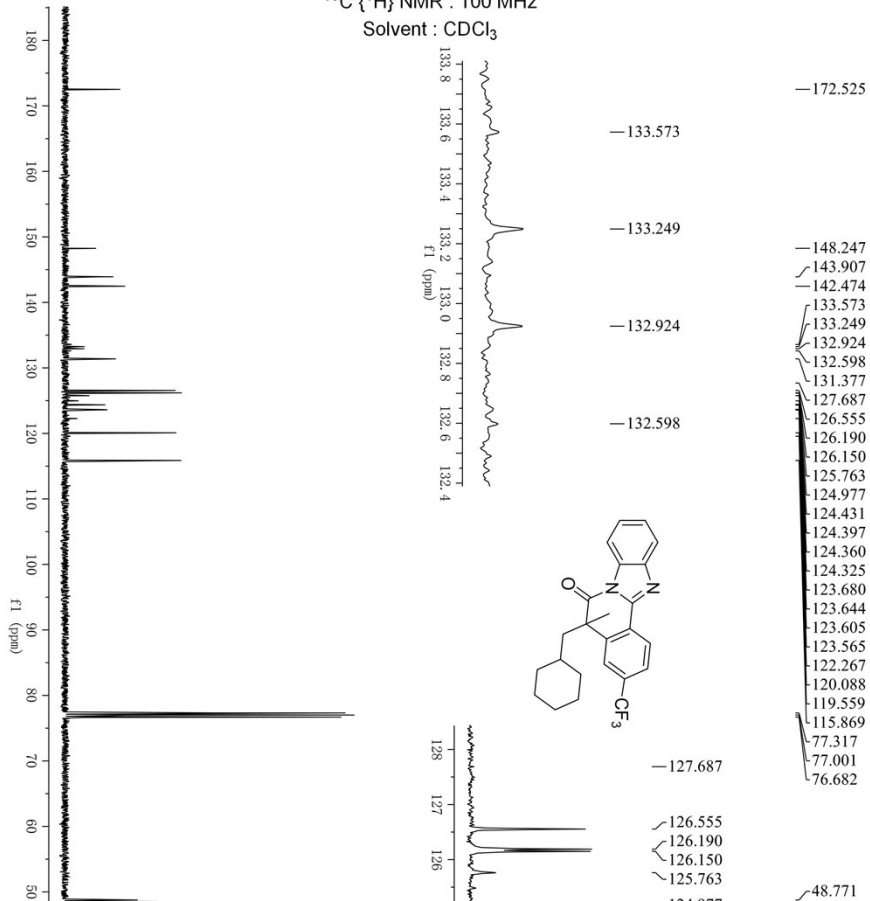

<sup>19</sup>F NMR : 282 MHz

Solvent : CDCl<sub>3</sub>

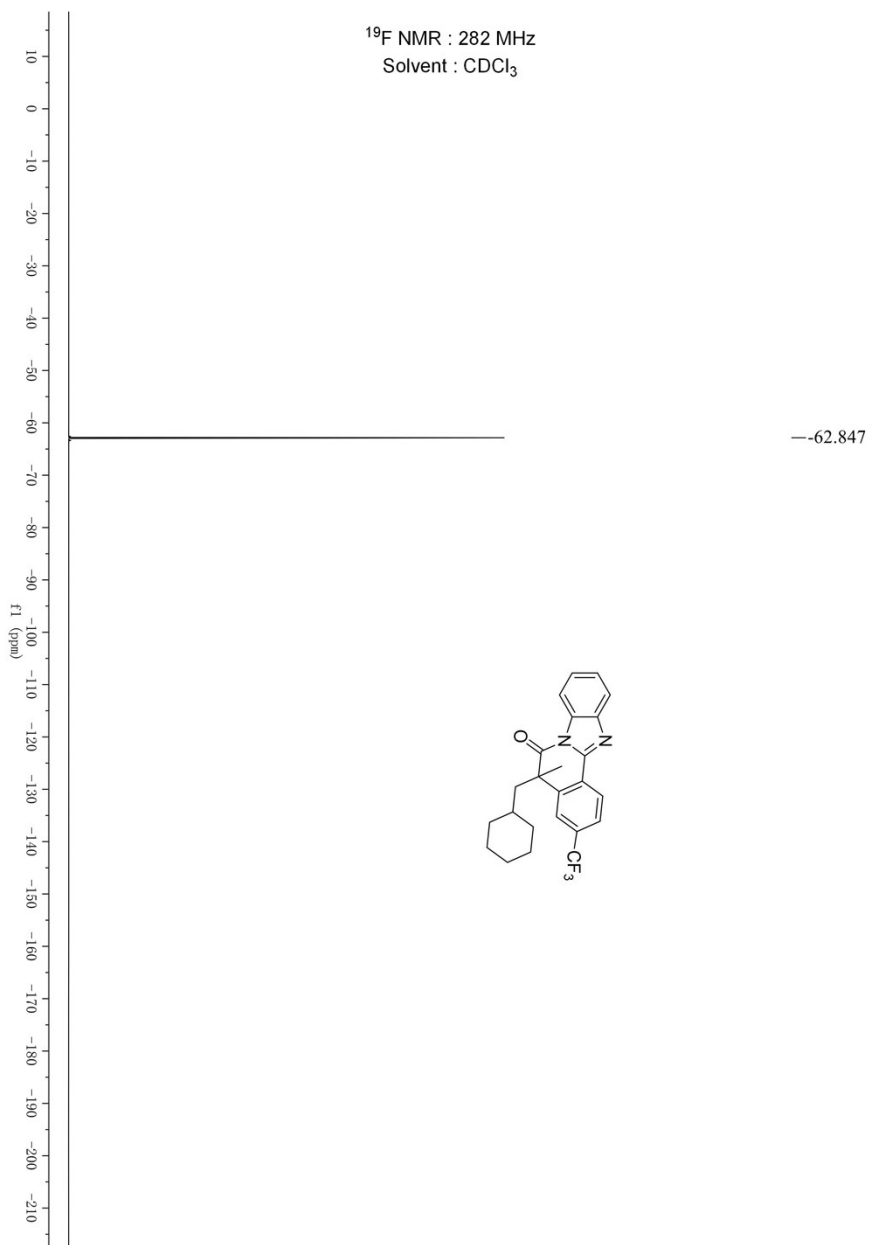



# 5-(Cyclo

<sup>1</sup>H NMR : 400 MHz  
Solvent : CDCl<sub>3</sub>

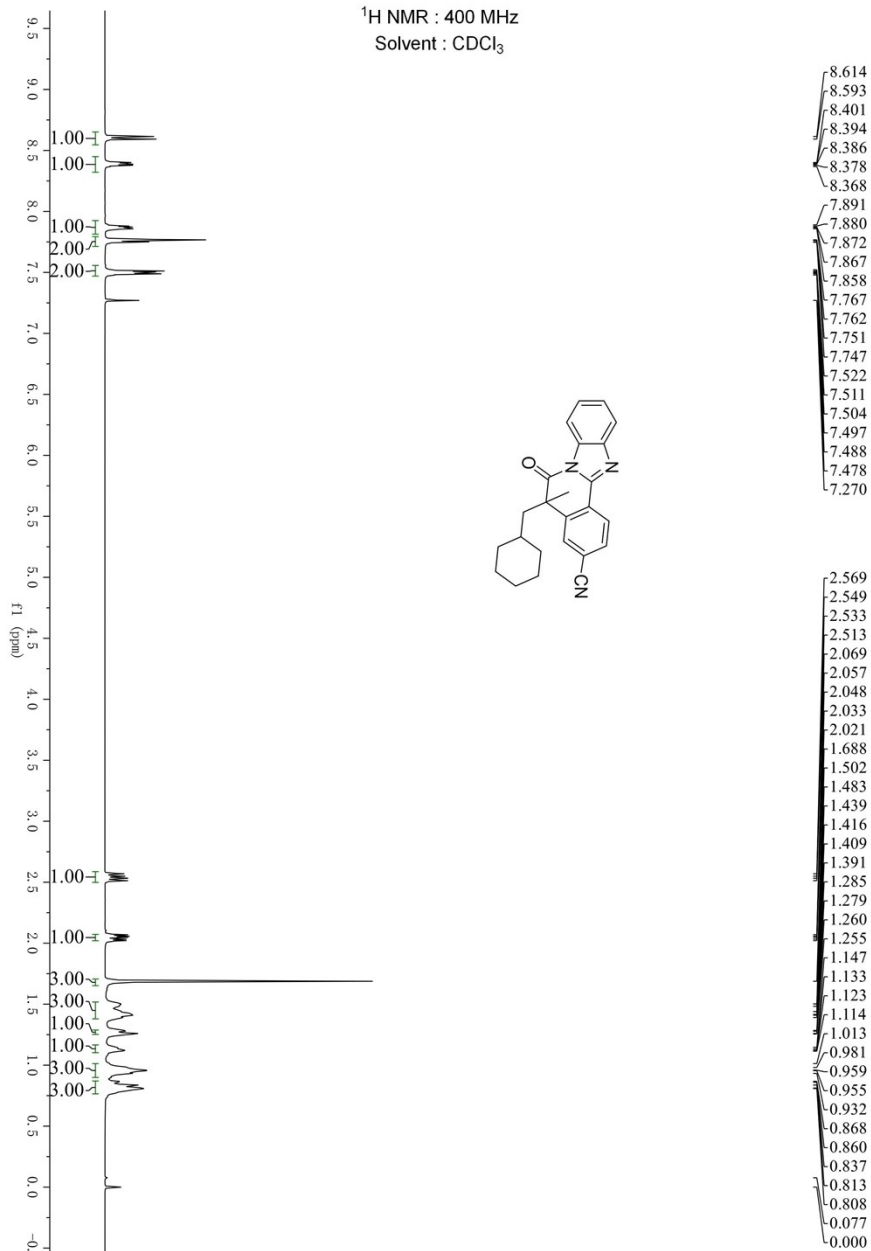

$^{13}\text{C} \{^1\text{H}\}$  NMR : 100 MHz  
Solvent :  $\text{CDCl}_3$

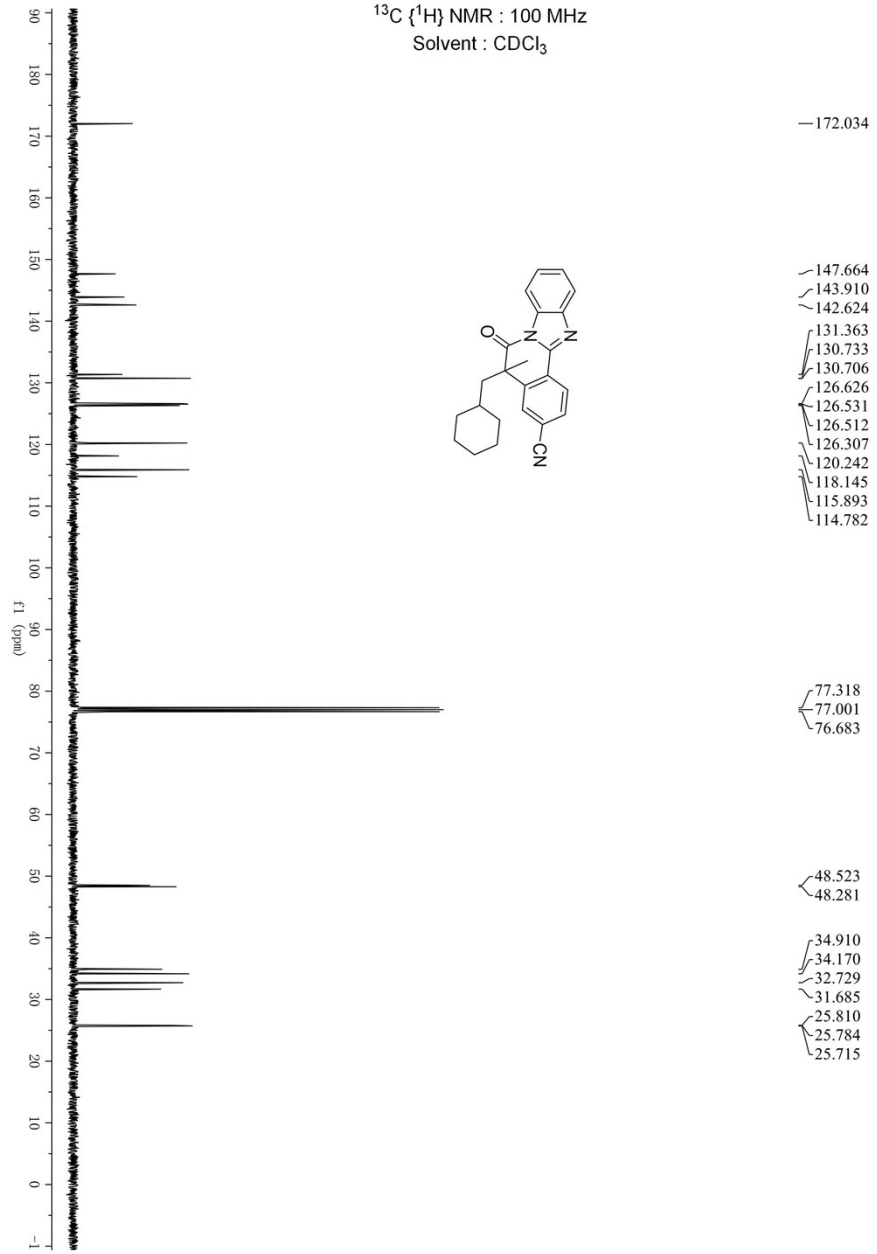

**5-(Cyclohexylmethyl)-2-methoxy-5-methylbenzo[4,5]imidazo[2,1-*a*]isoquinolin-6(5*H*)-one (3aea)**

**5-(Cyclohexylmethyl)**

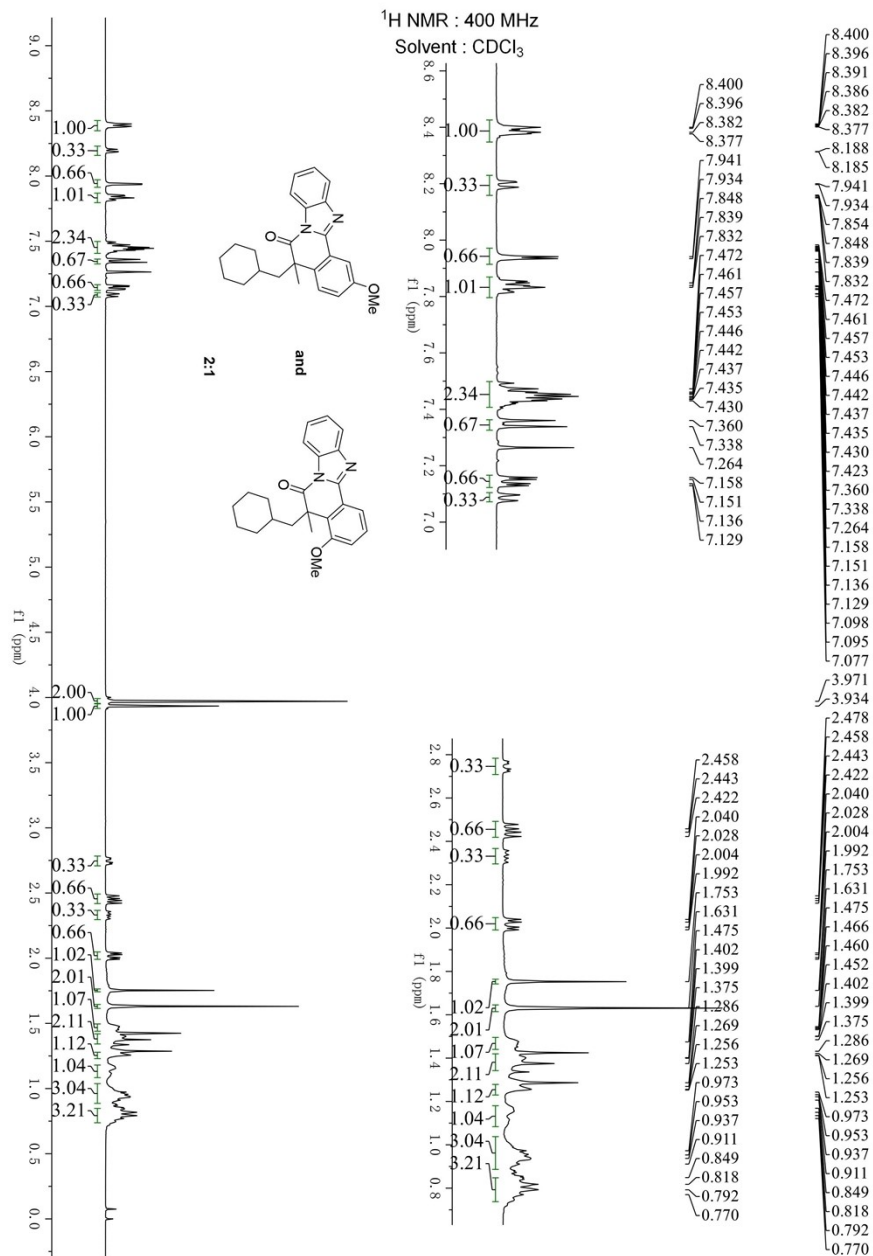

$^{13}\text{C}$  ( $^1\text{H}$ ) NMR : 100 MHz  
Solvent :  $\text{CDCl}_3$

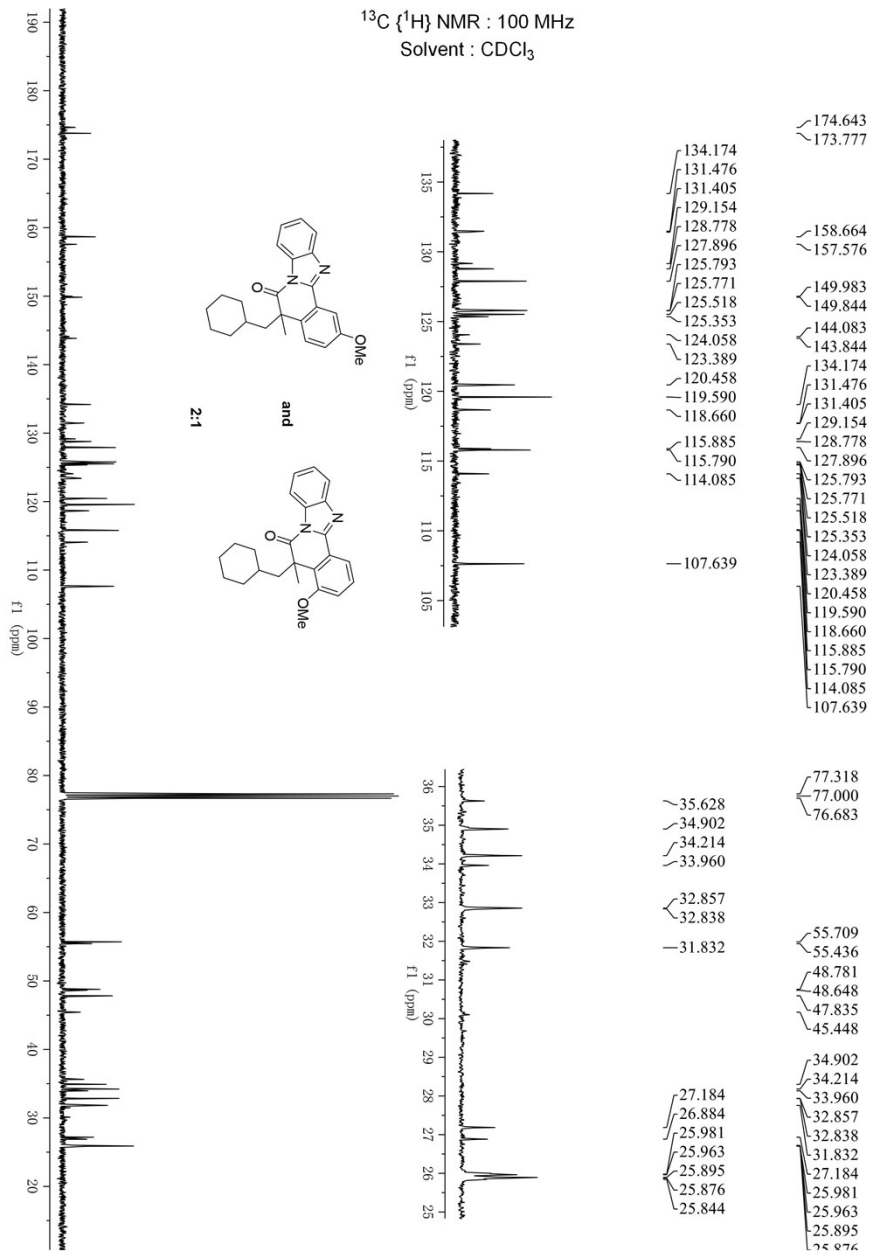



# 2-Chloro-5-

<sup>1</sup>H NMR : 400 MHz  
Solvent : CDCl<sub>3</sub>

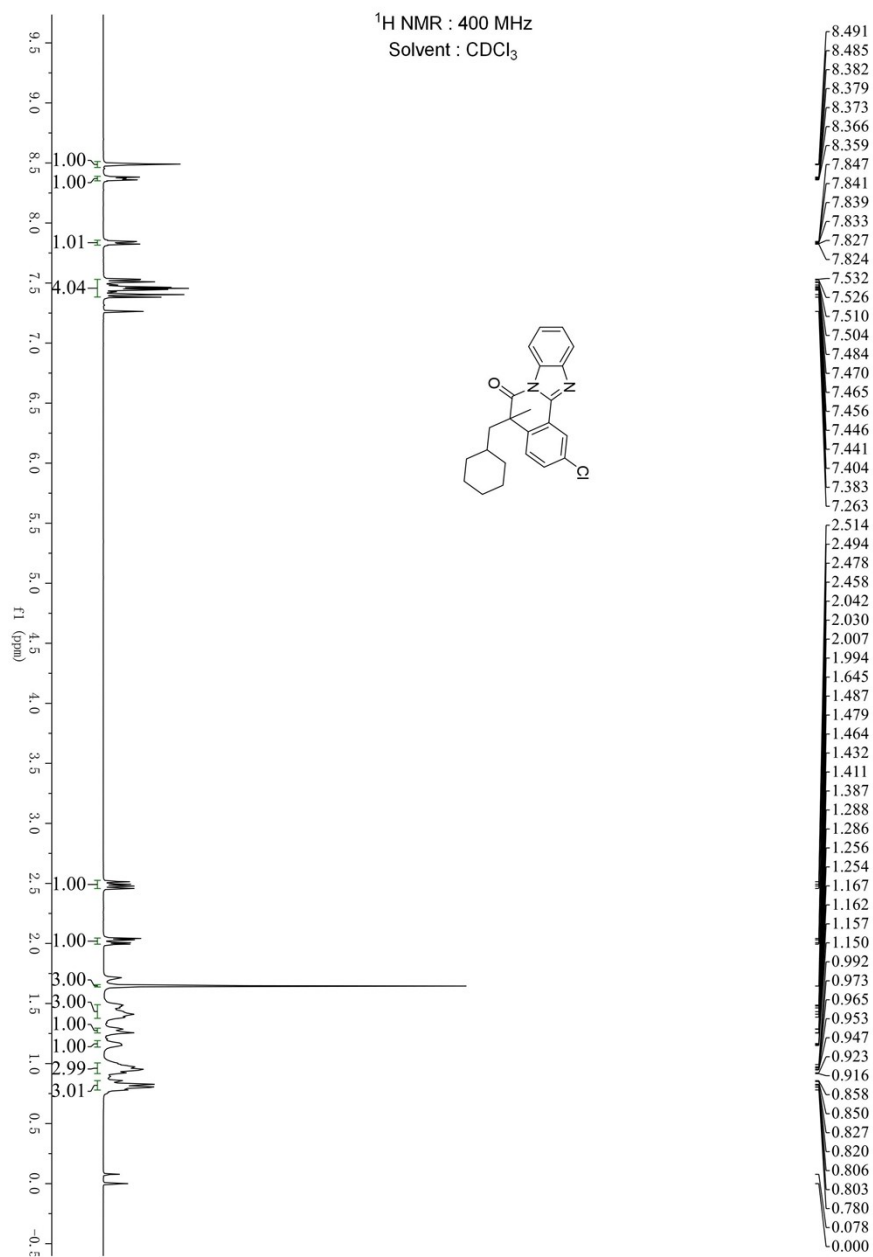

$^{13}\text{C}$   $\{^1\text{H}\}$  NMR : 100 MHz  
Solvent :  $\text{CDCl}_3$

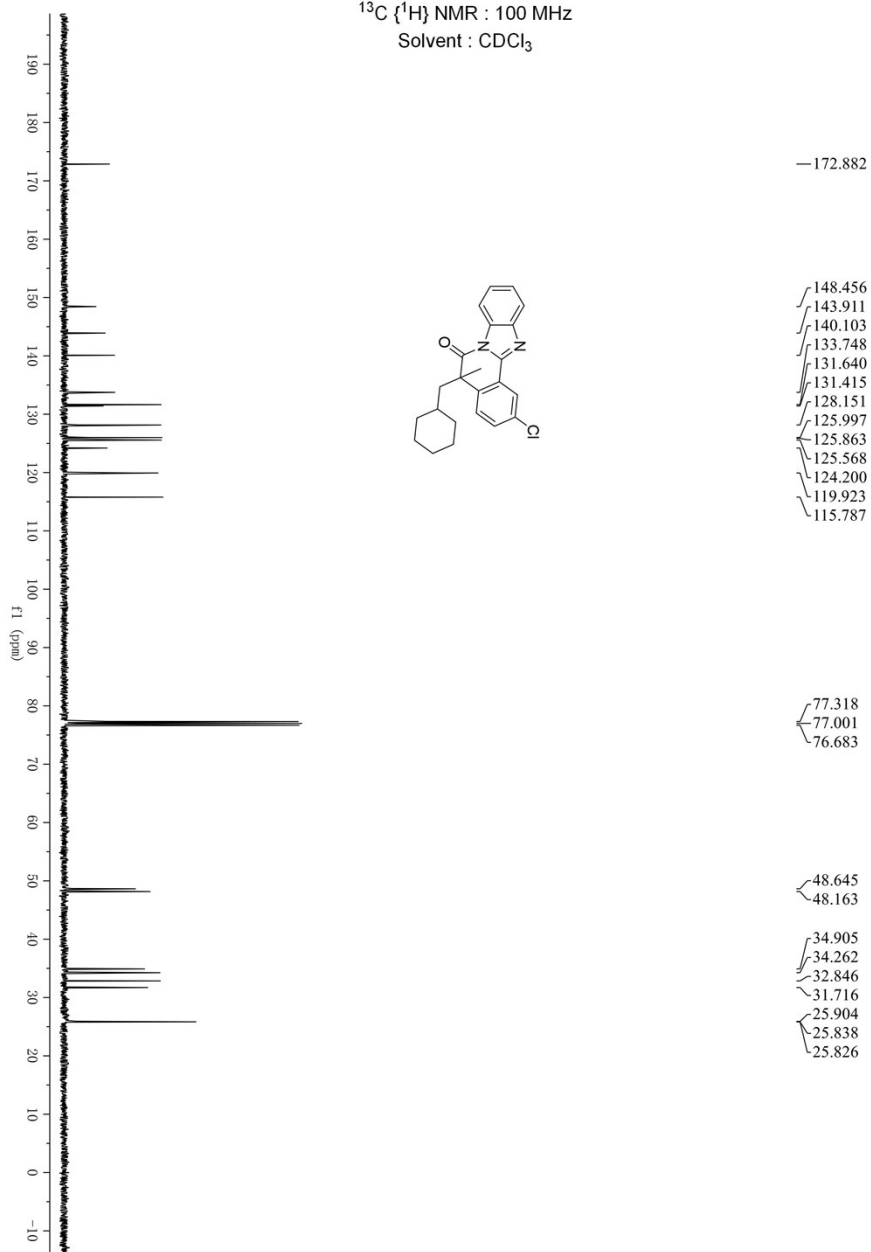

# 4-Chloro-5-

$^1\text{H NMR}$  : 400 MHz  
Solvent :  $\text{CDCl}_3$

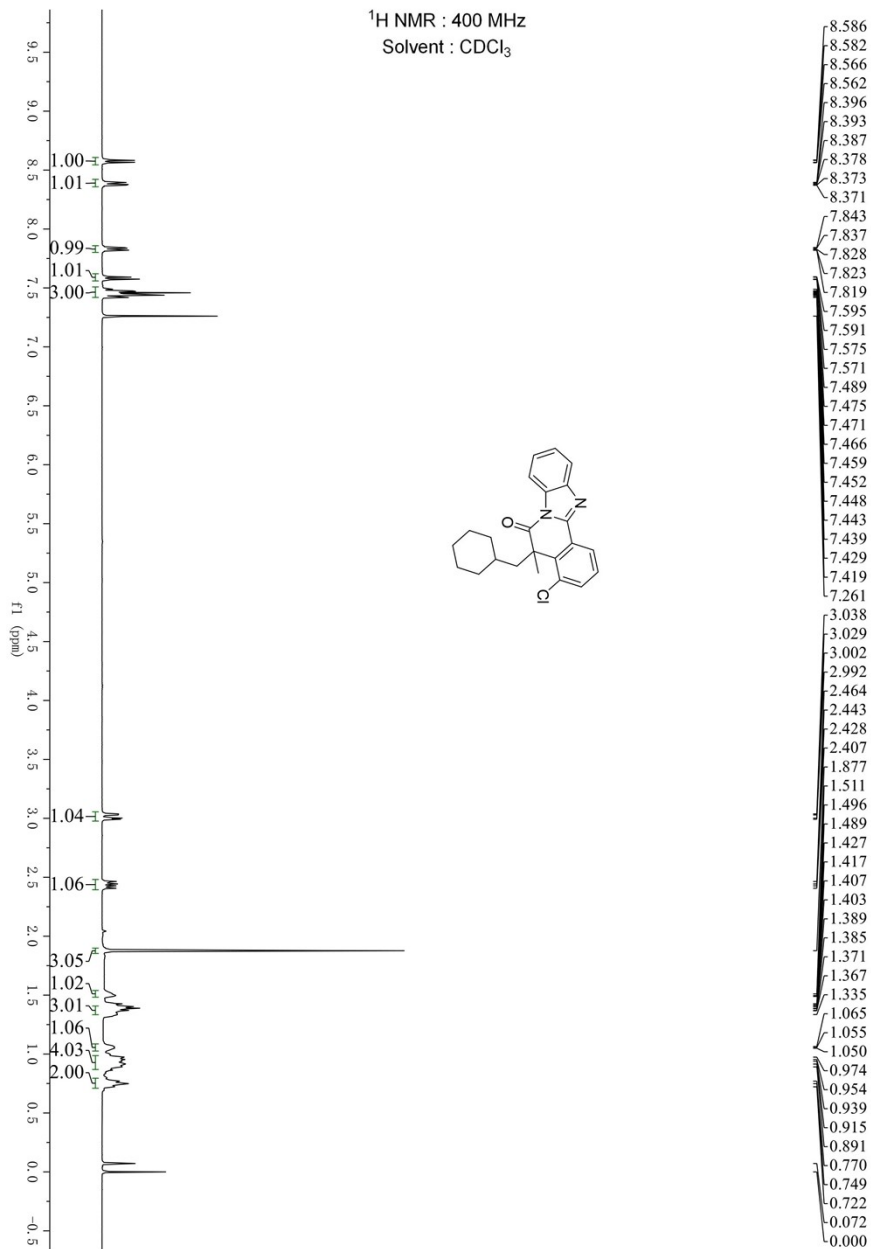

$^{13}\text{C} \{^1\text{H}\}$  NMR : 100 MHz  
Solvent :  $\text{CDCl}_3$

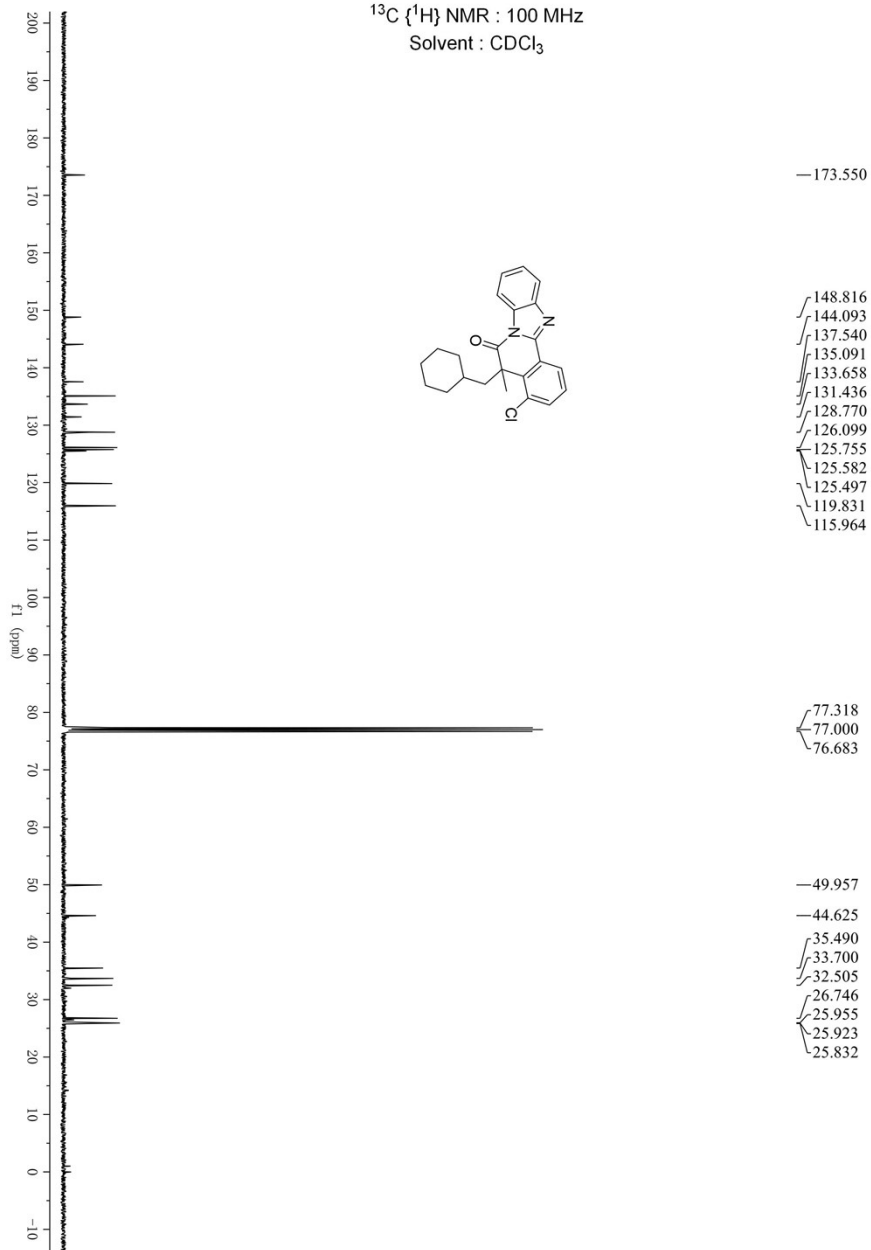

**5-(Cyclohex**

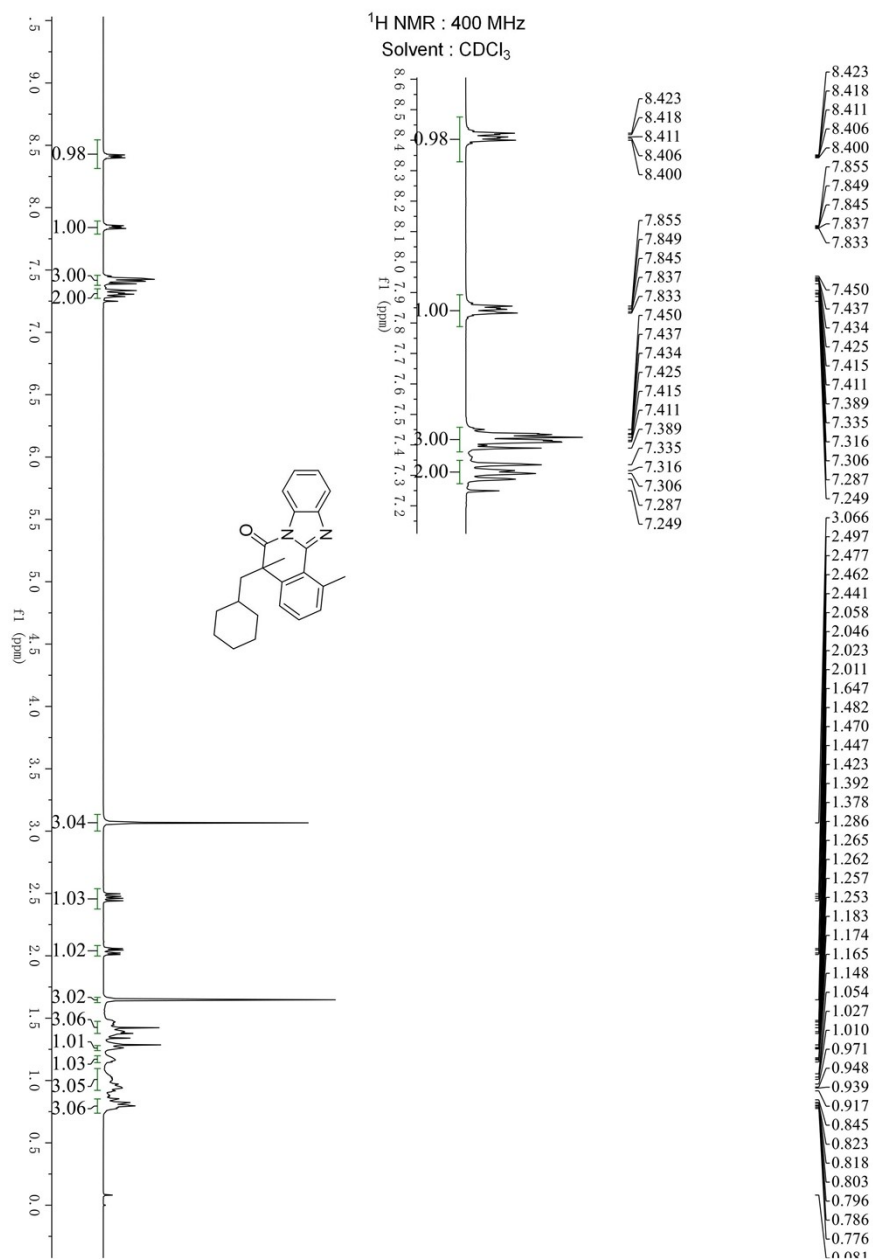

$^{13}\text{C}$   $\{^1\text{H}\}$  NMR : 100 MHz  
Solvent :  $\text{CDCl}_3$

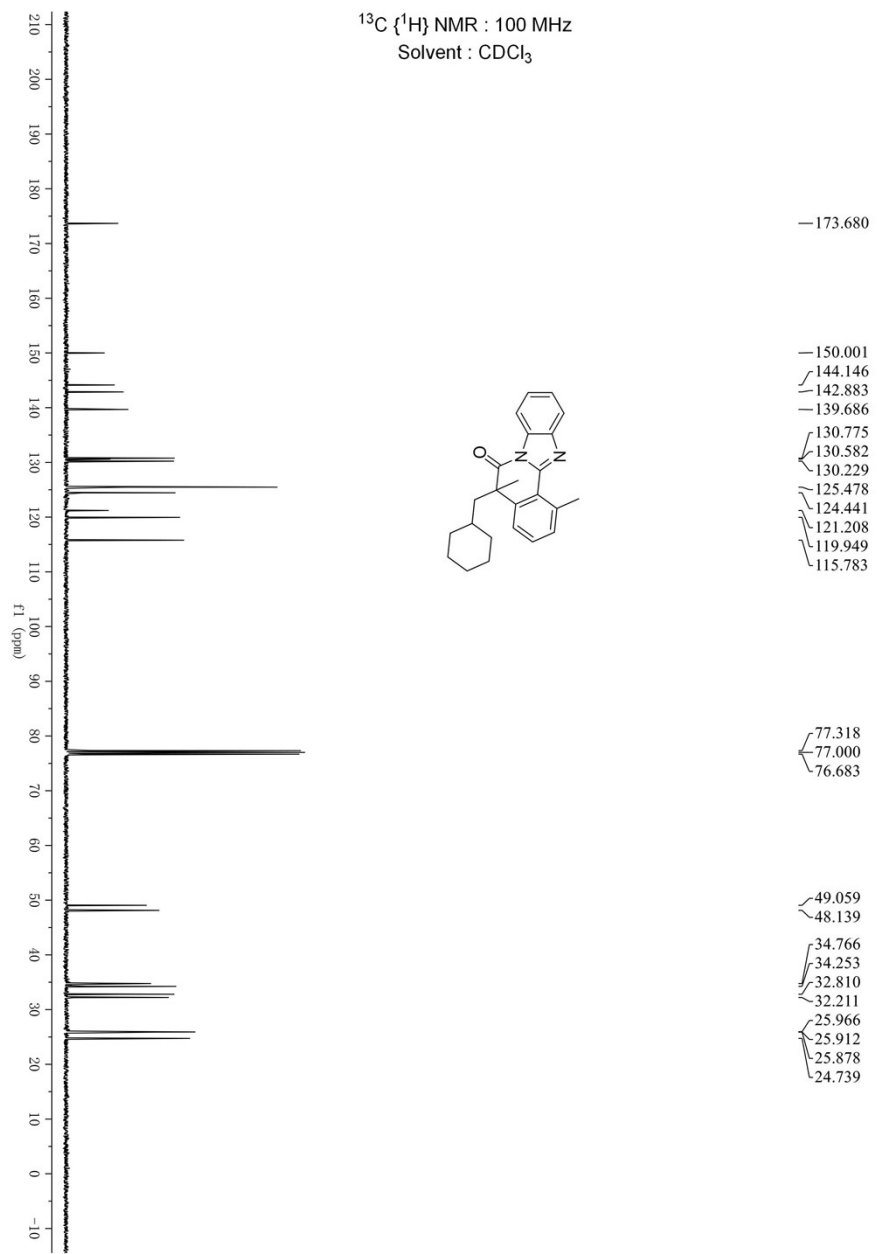

# 1-Chloro-5-

<sup>1</sup>H NMR : 400 MHz  
Solvent : CDCl<sub>3</sub>

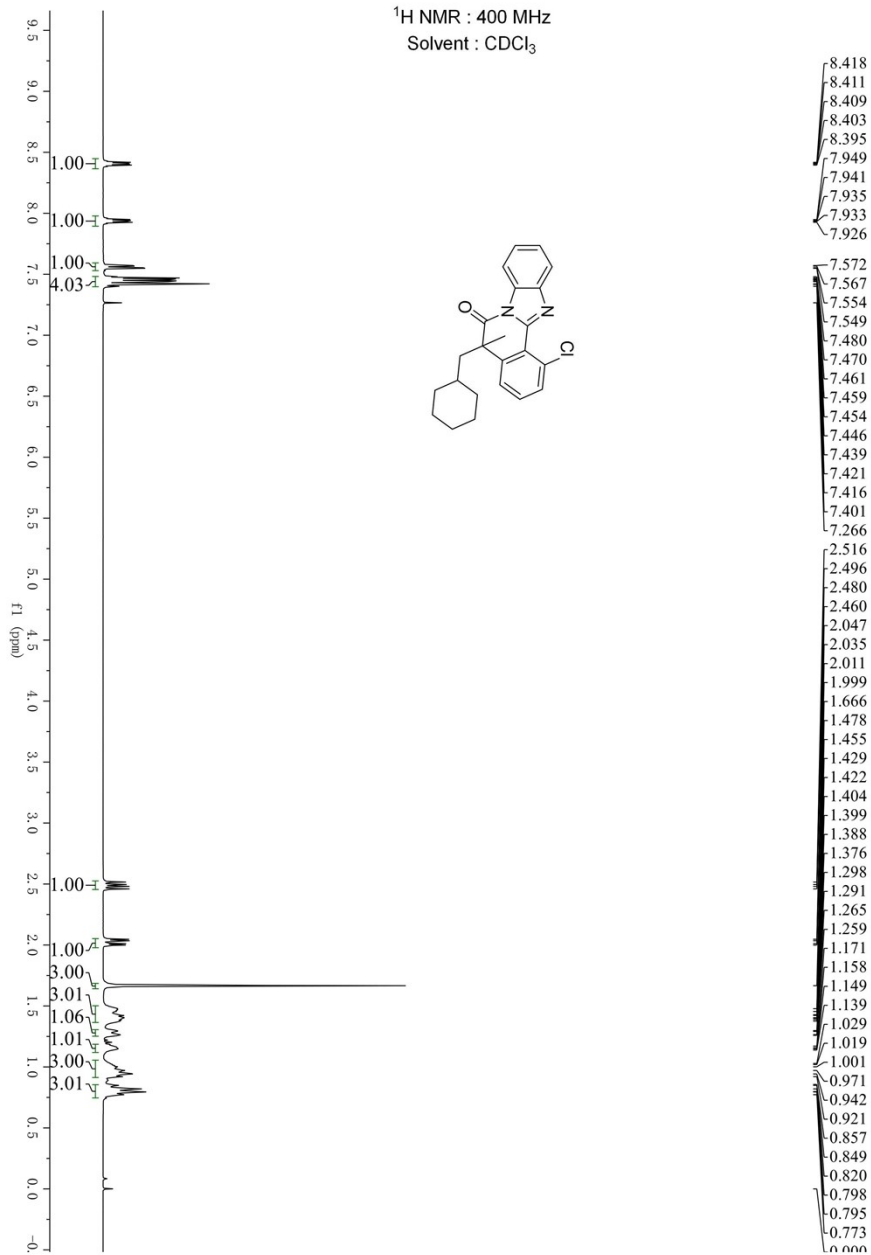

$^{13}\text{C}$   $\{^1\text{H}\}$  NMR : 100 MHz  
Solvent :  $\text{CDCl}_3$

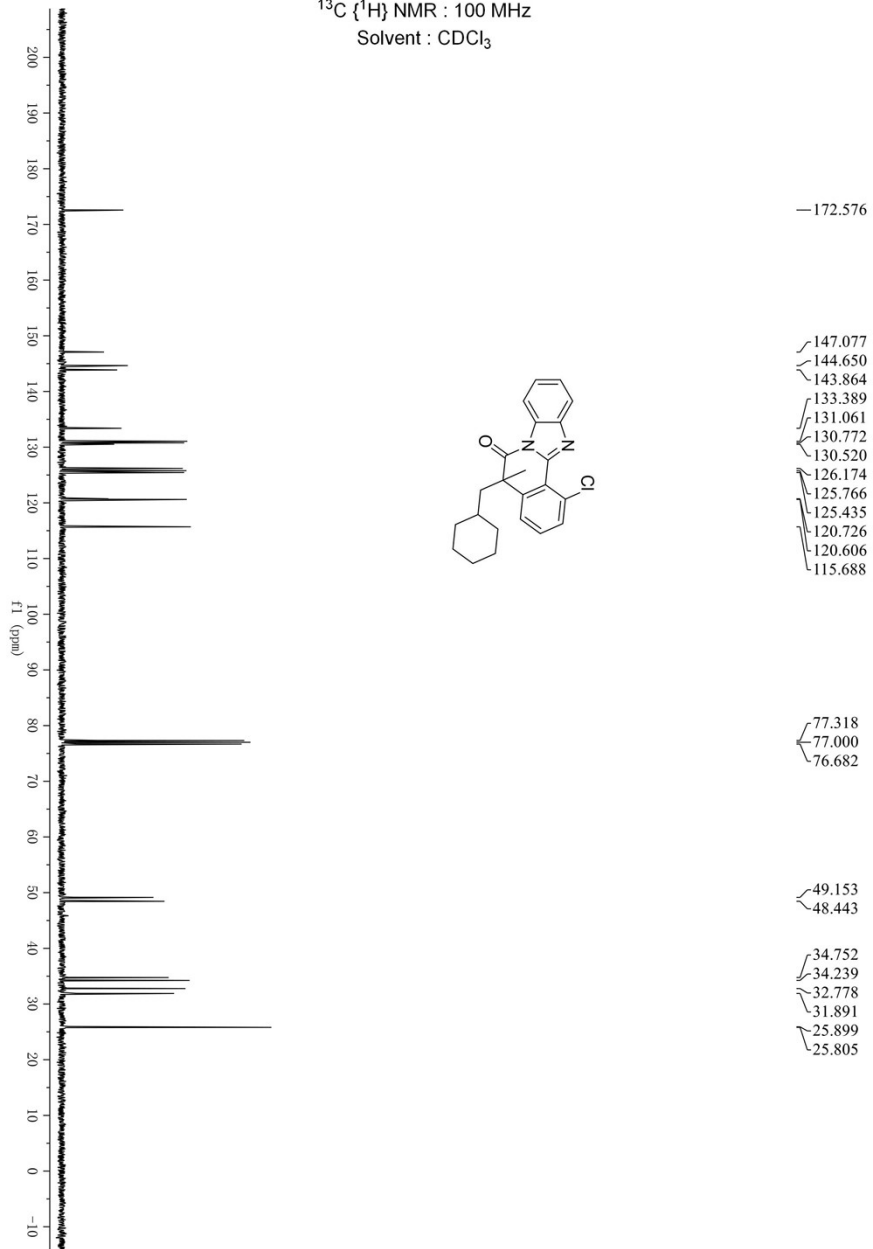



# 7-(Cyclohexylmethyl)-2-(2-phenylphenyl)-1H-imidazole-5-carboxamide

$^1\text{H NMR}$  : 400 MHz  
Solvent :  $\text{CDCl}_3$

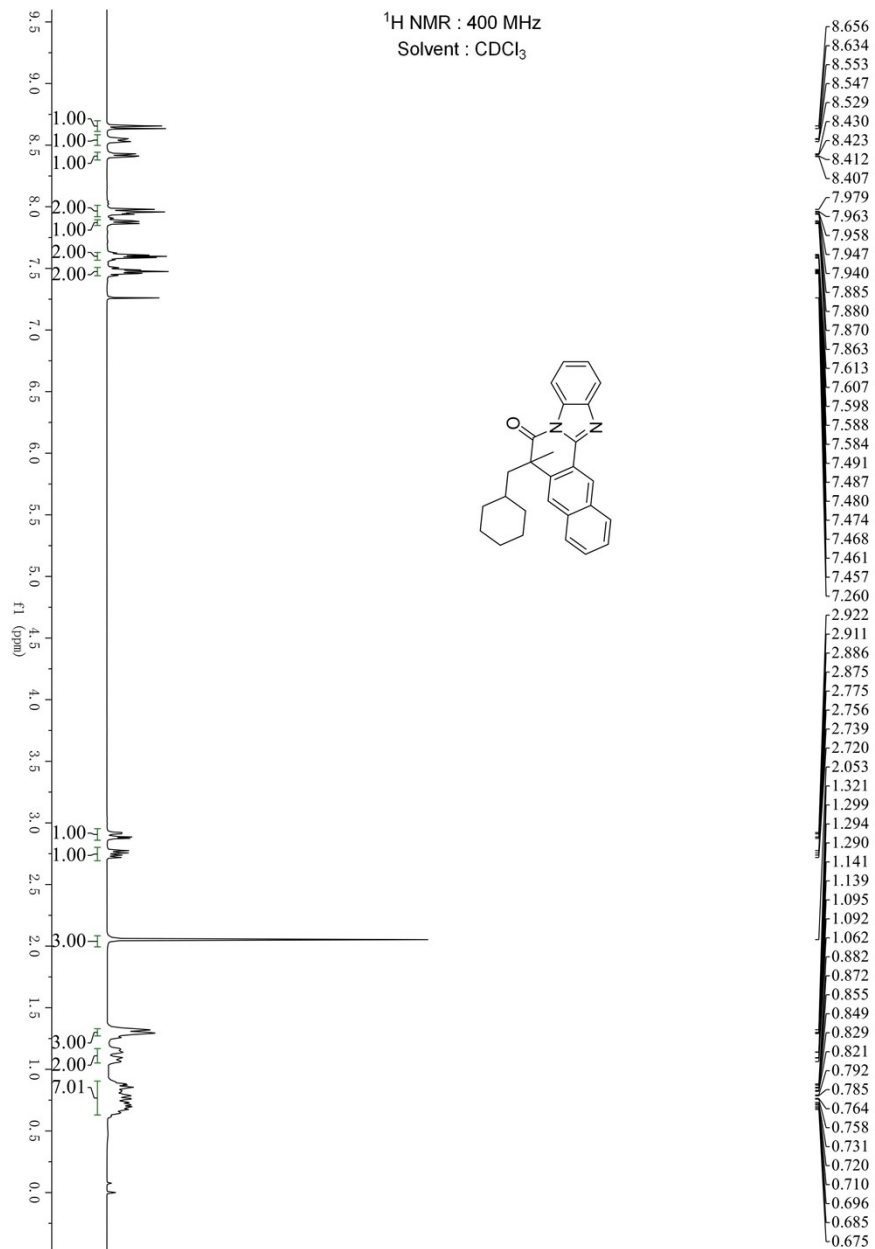

$^{13}\text{C}$   $\{^1\text{H}\}$  NMR : 100 MHz  
Solvent :  $\text{CDCl}_3$

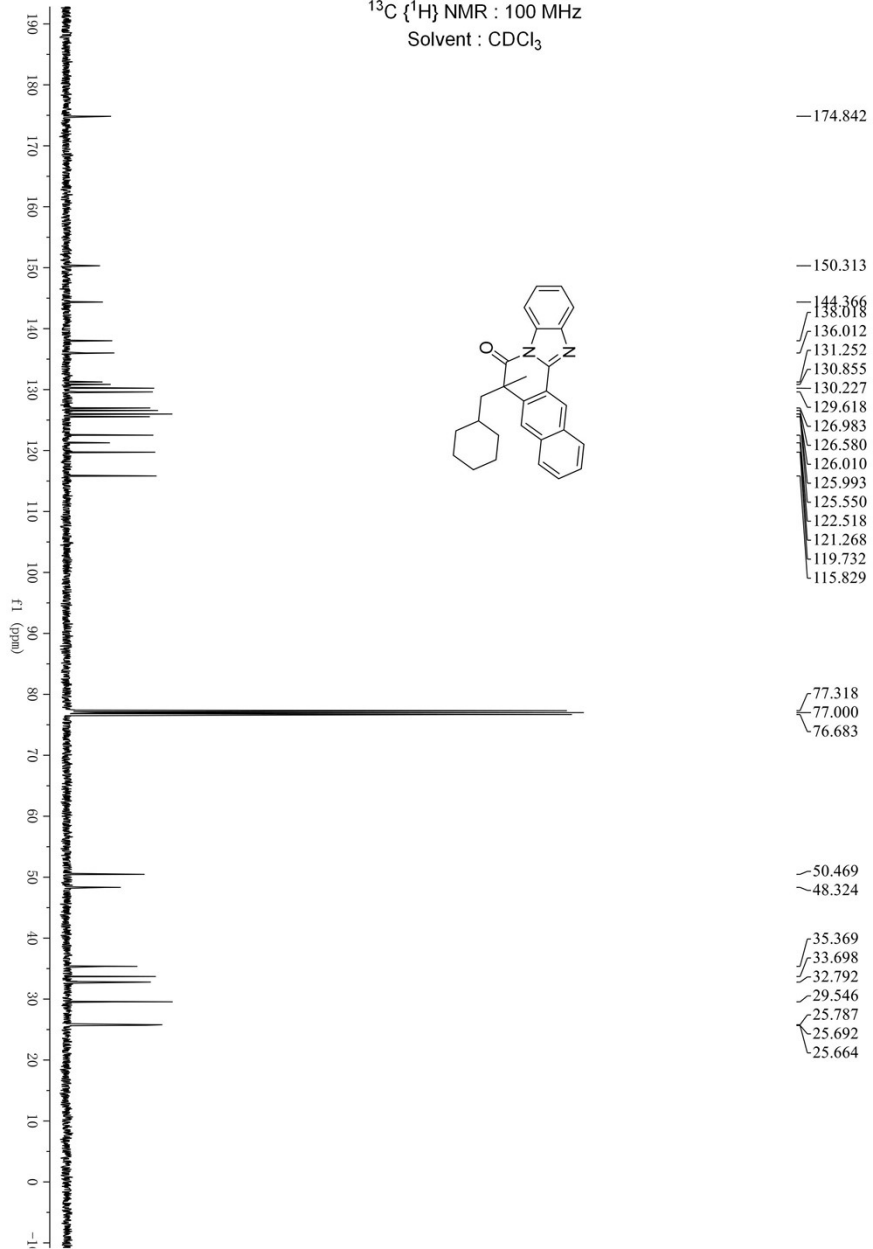

# 5-(Cyclohexy

<sup>1</sup>H NMR : 400 MHz  
Solvent : CDCl<sub>3</sub>

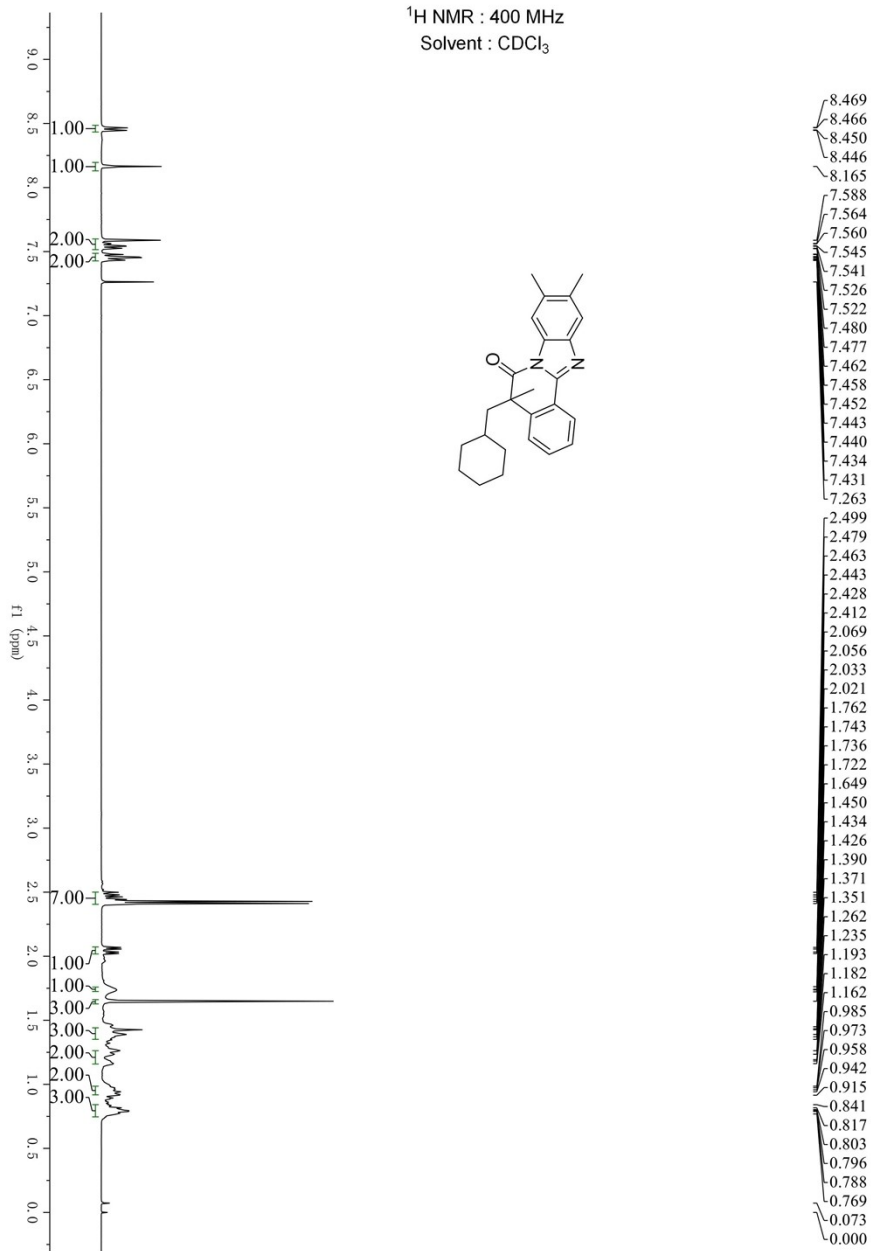

$^{13}\text{C} \{^1\text{H}\}$  NMR : 100 MHz  
Solvent :  $\text{CDCl}_3$

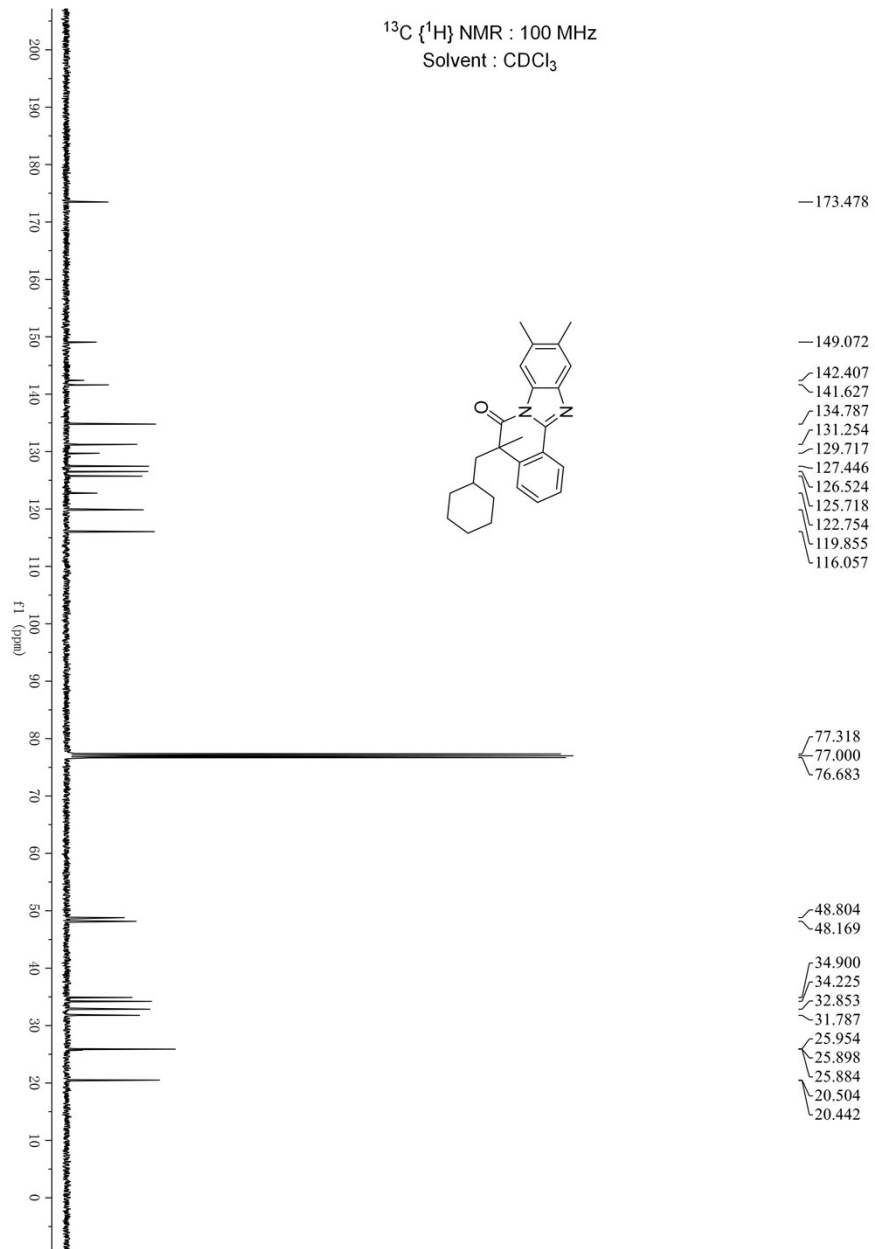

# 9,10-Di

<sup>1</sup>H NMR : 400 MHz  
Solvent : CDCl<sub>3</sub>

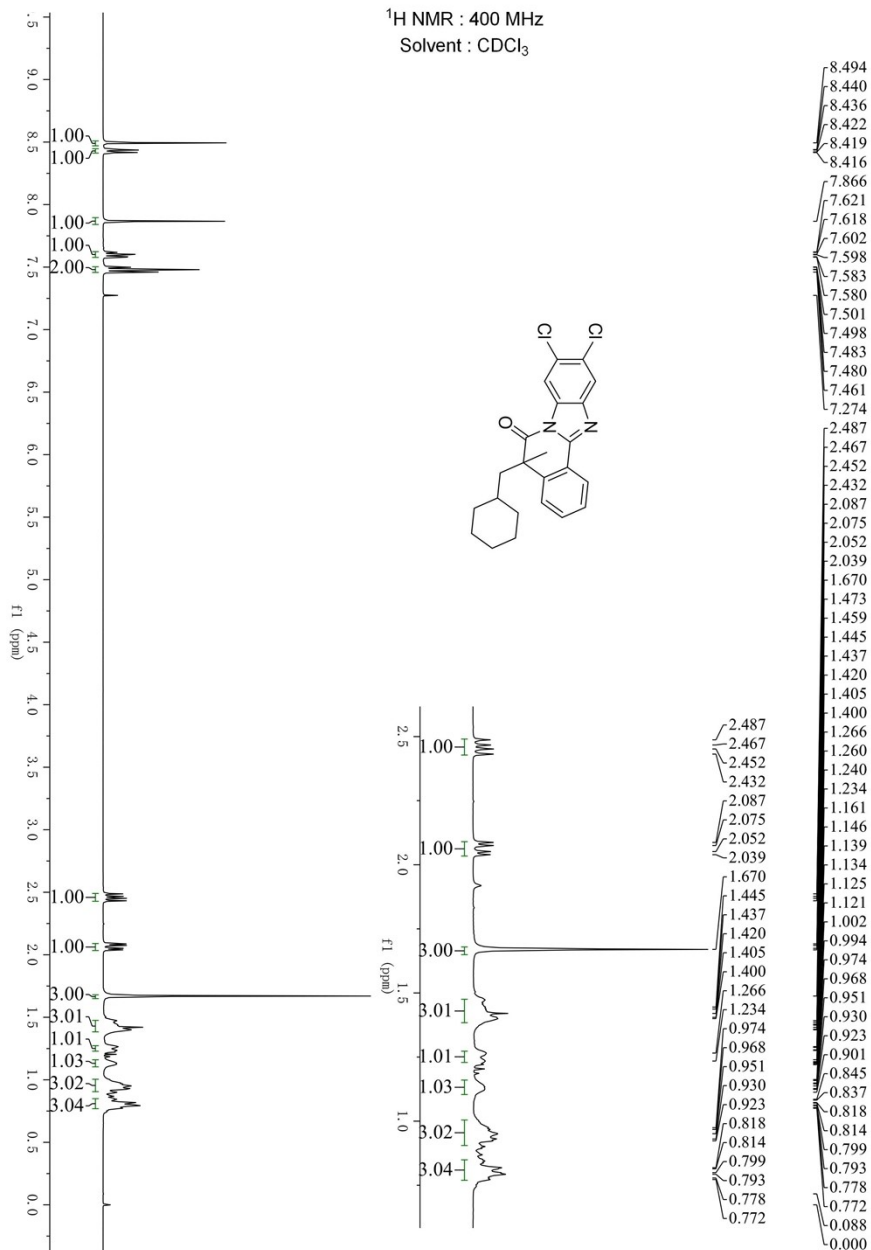

$^{13}\text{C}$   $\{^1\text{H}\}$  NMR : 100 MHz  
Solvent :  $\text{CDCl}_3$

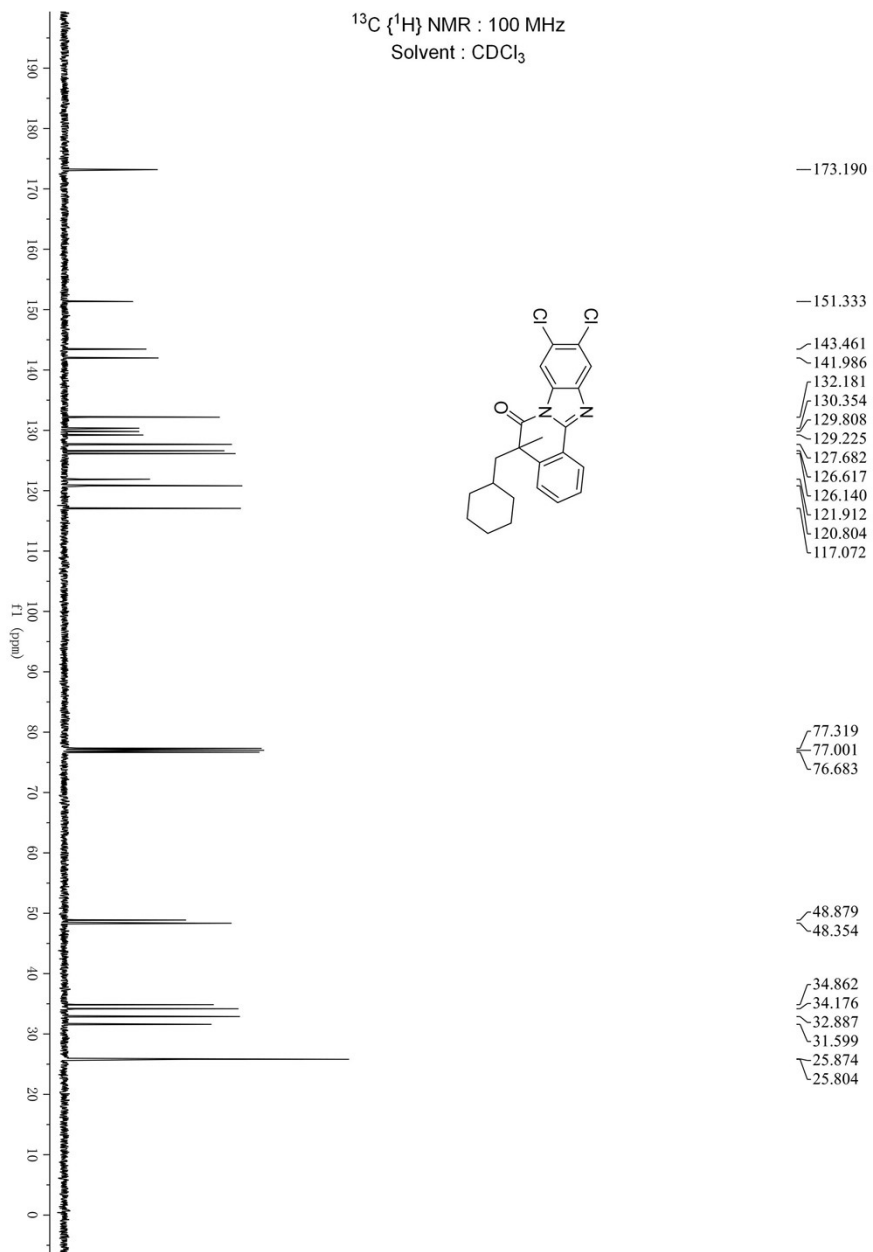

# 5-(Cyclohex-

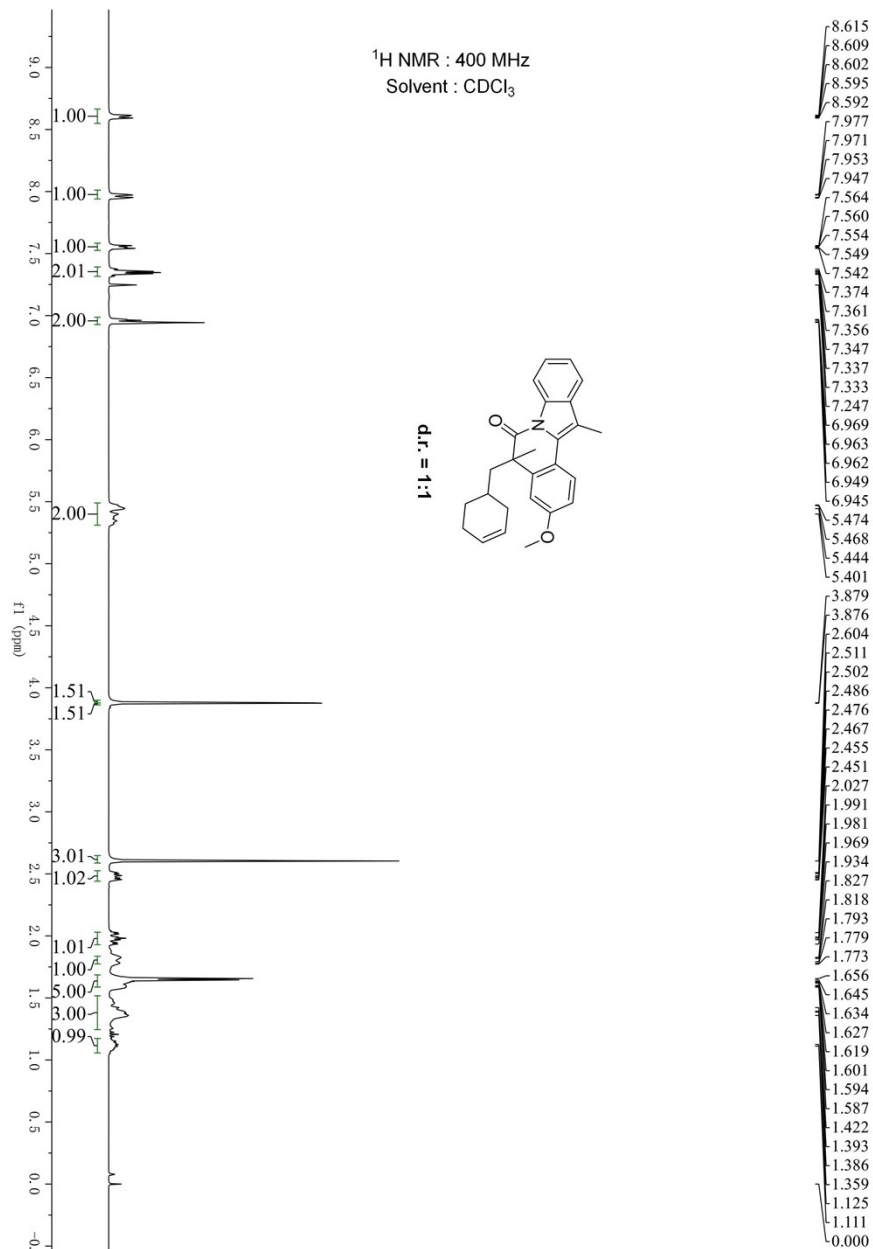

$^{13}\text{C}$   $\{^1\text{H}\}$  NMR : 100 MHz  
Solvent :  $\text{CDCl}_3$

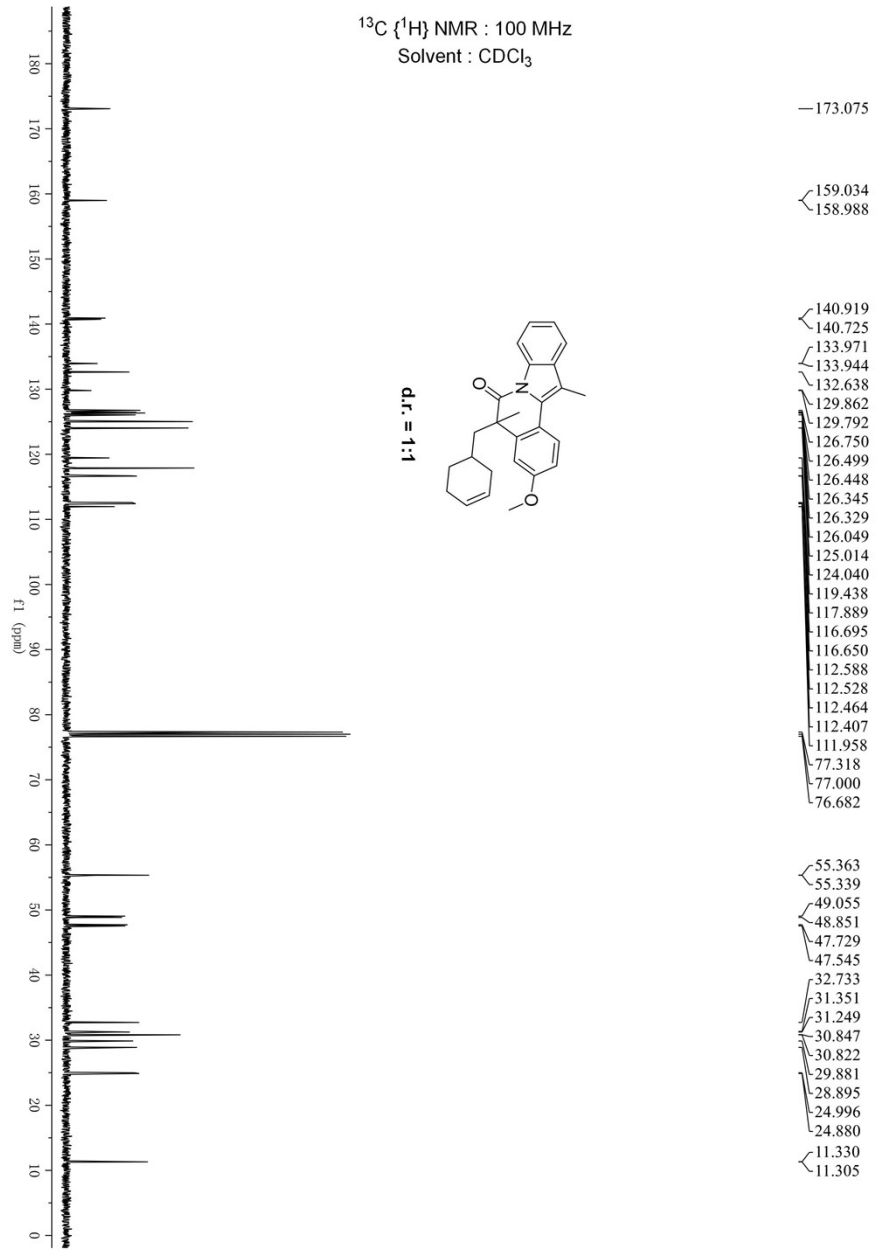



*tert*-But  
*a*

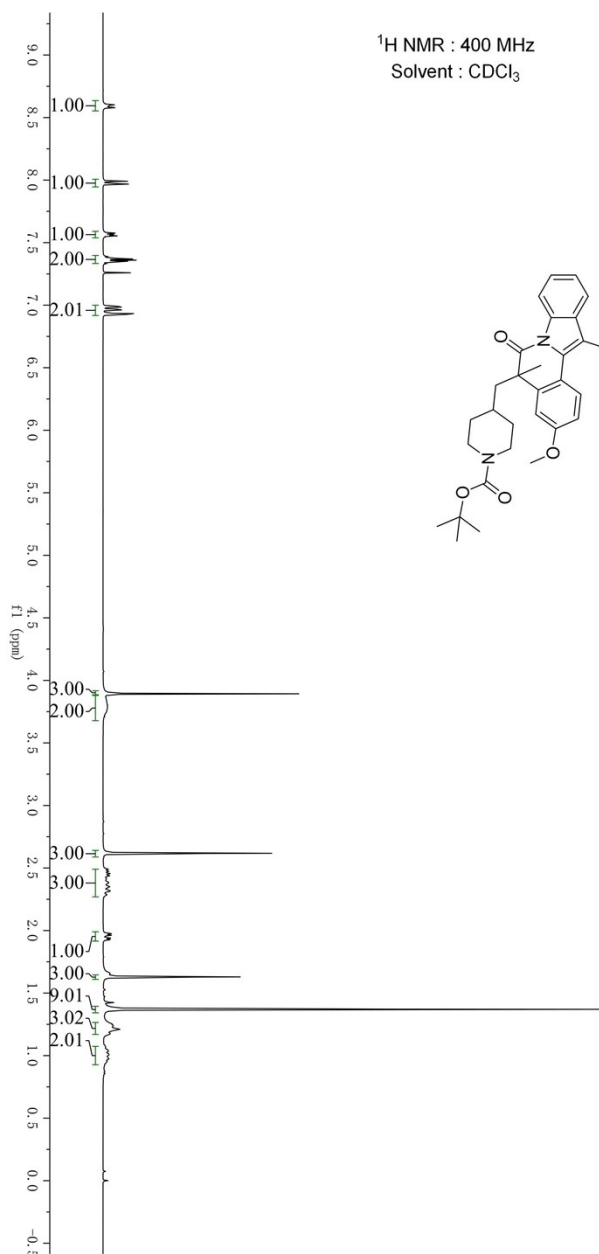

8.602  
8.596  
8.593  
8.590  
8.579

7.991  
7.969

7.576  
7.564  
7.560  
7.554

7.387  
7.374  
7.369  
7.360  
7.351  
7.347  
7.259

6.990  
6.984  
6.968  
6.962  
6.933  
6.926

3.893  
3.862  
3.814  
3.790  
3.783  
3.762

2.618  
2.491  
2.473  
2.456  
2.438  
2.383  
2.350  
2.317  
2.287  
1.971  
1.962  
1.939  
1.927  
1.629  
1.370  
1.253  
1.240  
1.235  
1.210  
1.192  
1.175  
1.073  
1.044  
1.012  
1.005  
0.979  
0.973  
0.956  
0.074  
0.000

$^{13}\text{C}$   $\{^1\text{H}\}$  NMR : 100 MHz  
Solvent :  $\text{CDCl}_3$

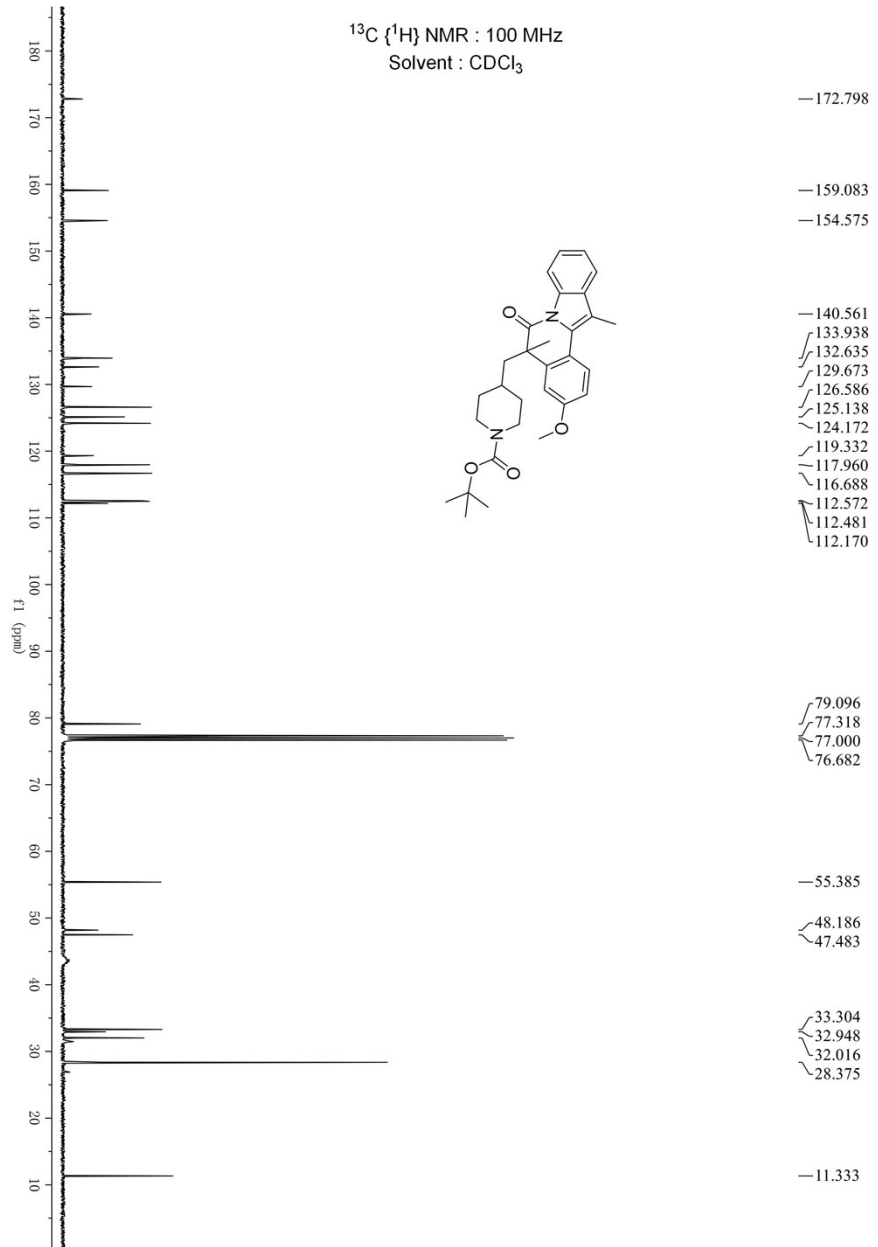

# 5-(Cyclopent

<sup>1</sup>H NMR : 400 MHz  
Solvent : CDCl<sub>3</sub>

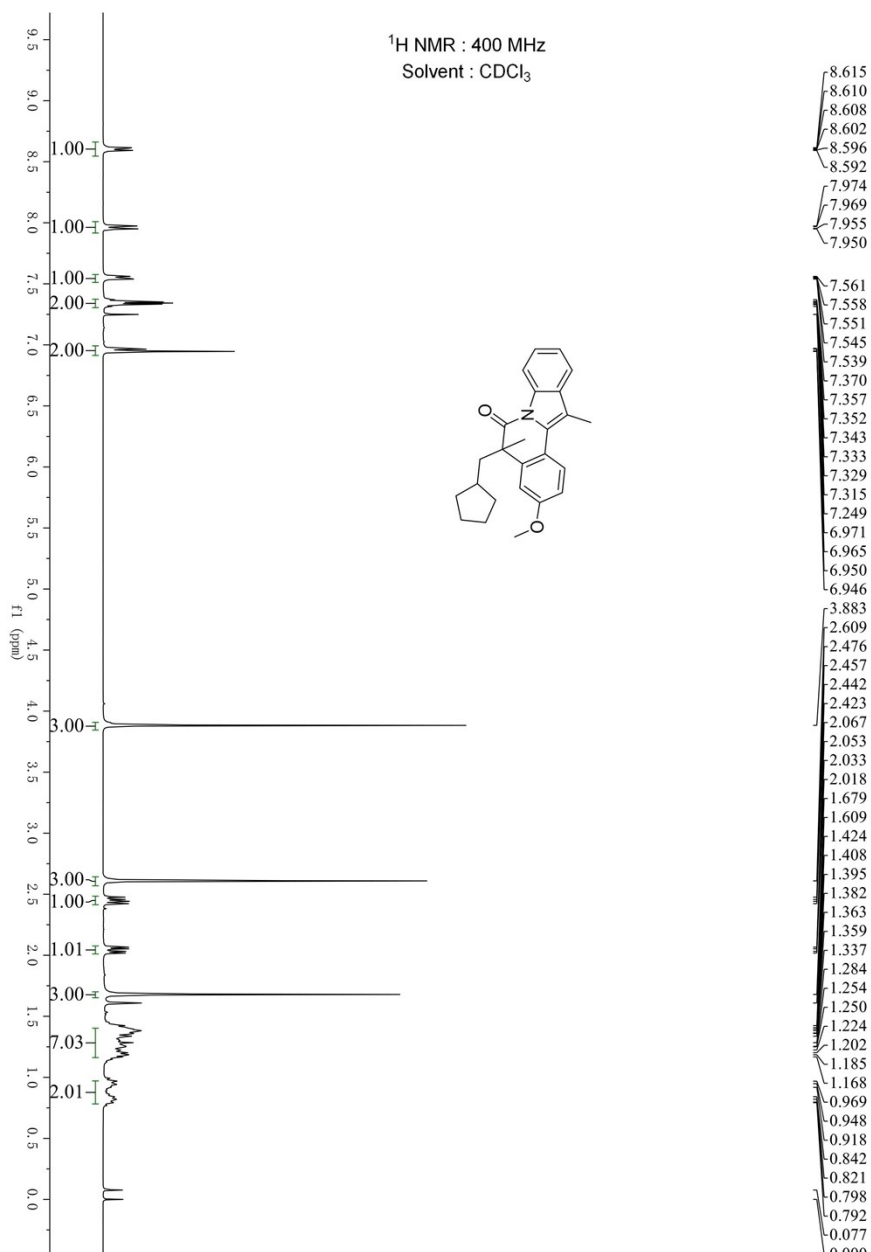

$^{13}\text{C}$   $\{^1\text{H}\}$  NMR : 100 MHz  
Solvent :  $\text{CDCl}_3$

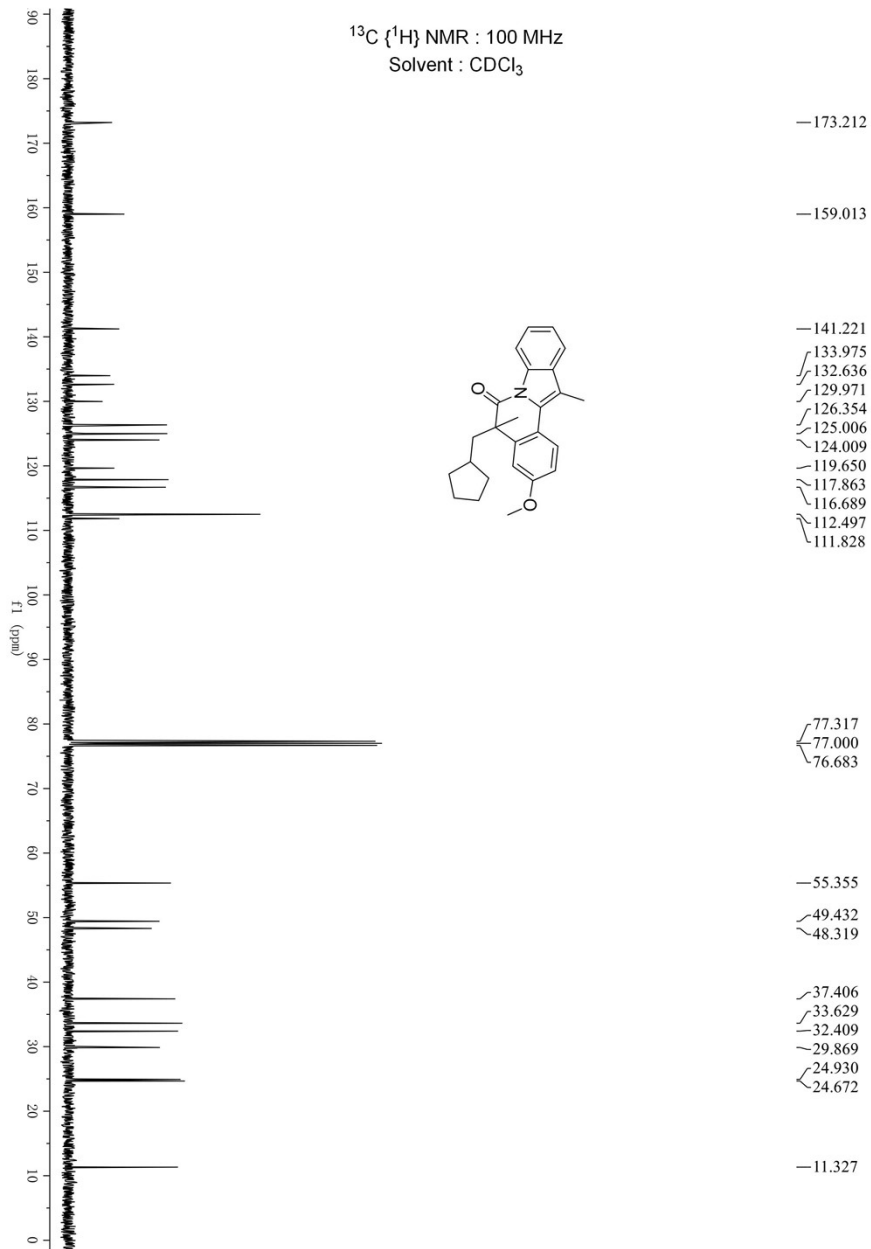

### 3-Methoxy

$^1\text{H}$  NMR : 400 MHz  
Solvent :  $\text{CDCl}_3$

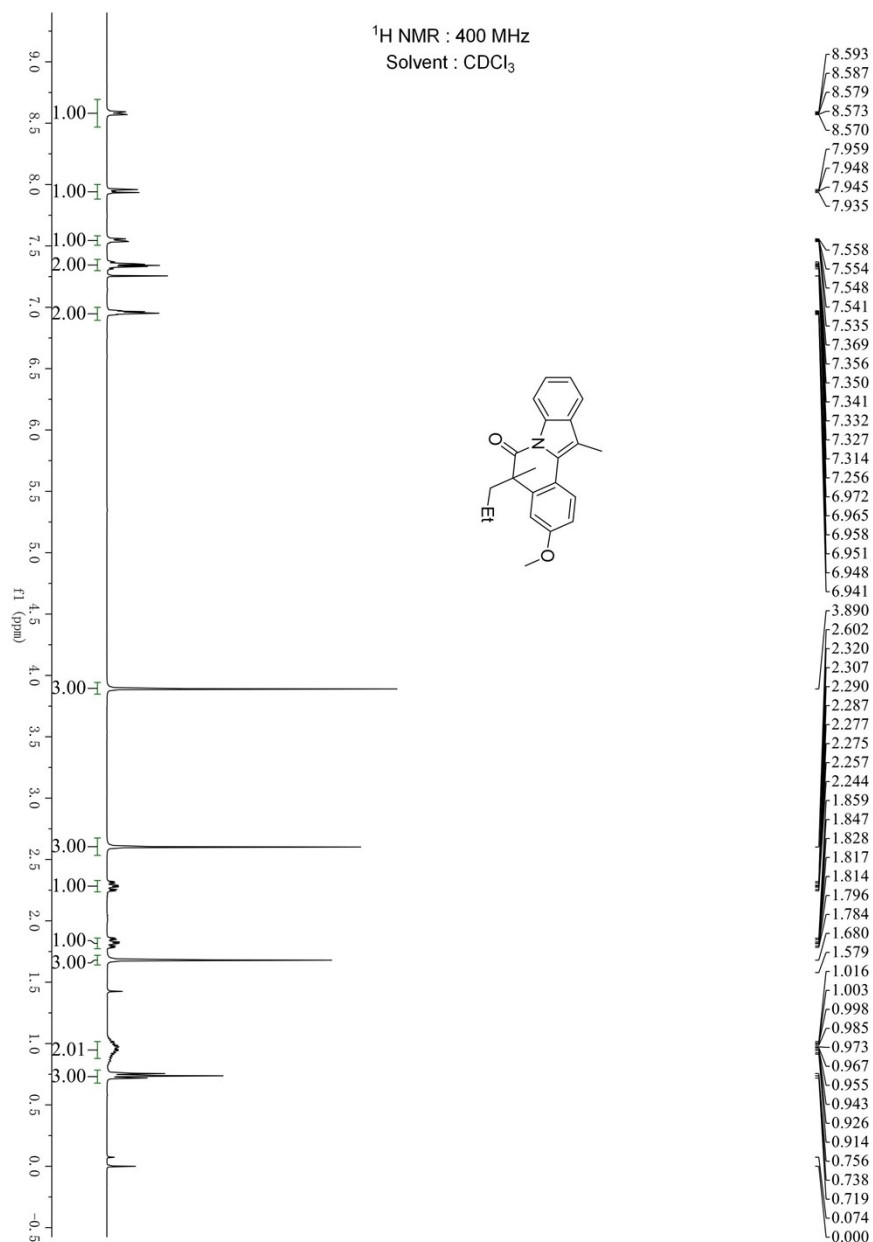

$^{13}\text{C}$   $\{^1\text{H}\}$  NMR : 100 MHz  
Solvent :  $\text{CDCl}_3$

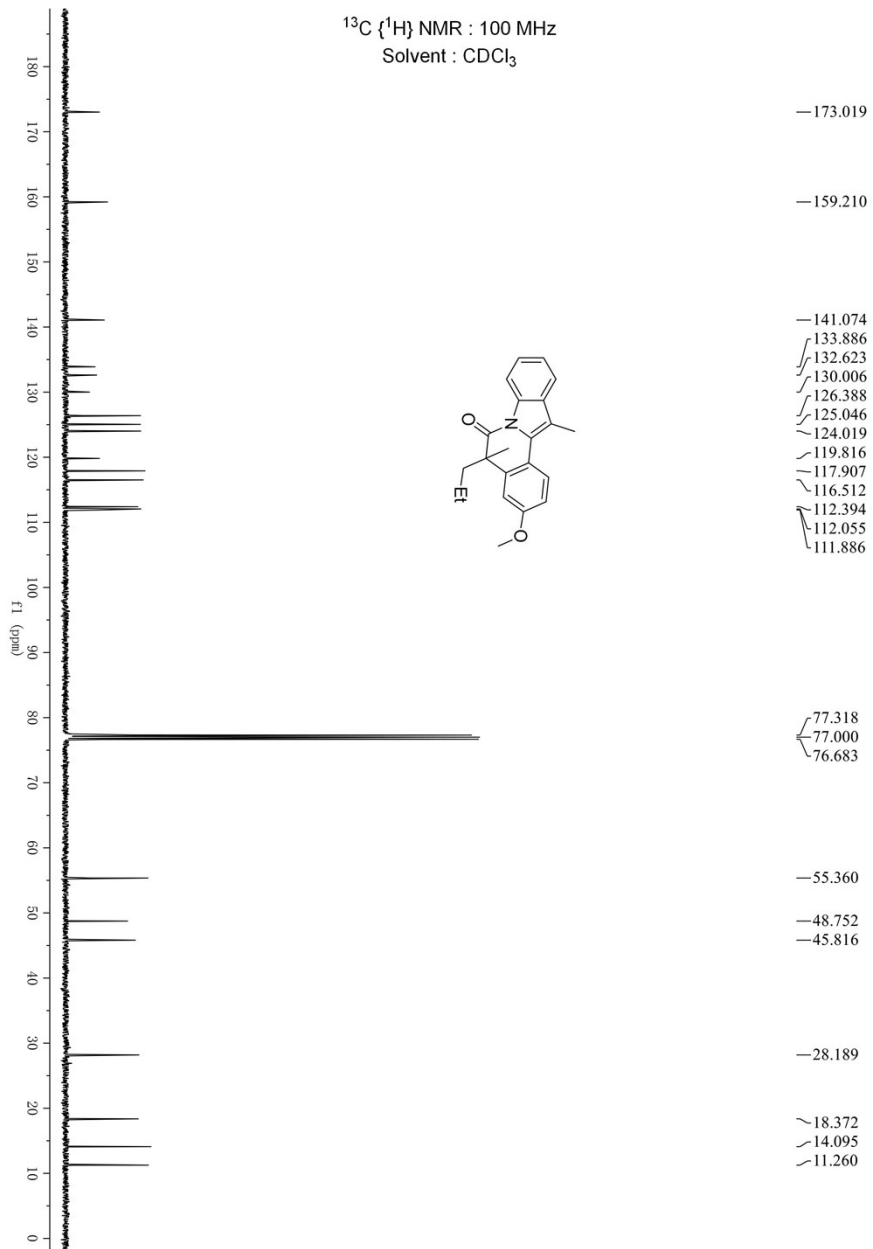

# 5-Butyl-3.

$^1\text{H NMR}$  : 400 MHz  
Solvent :  $\text{CDCl}_3$

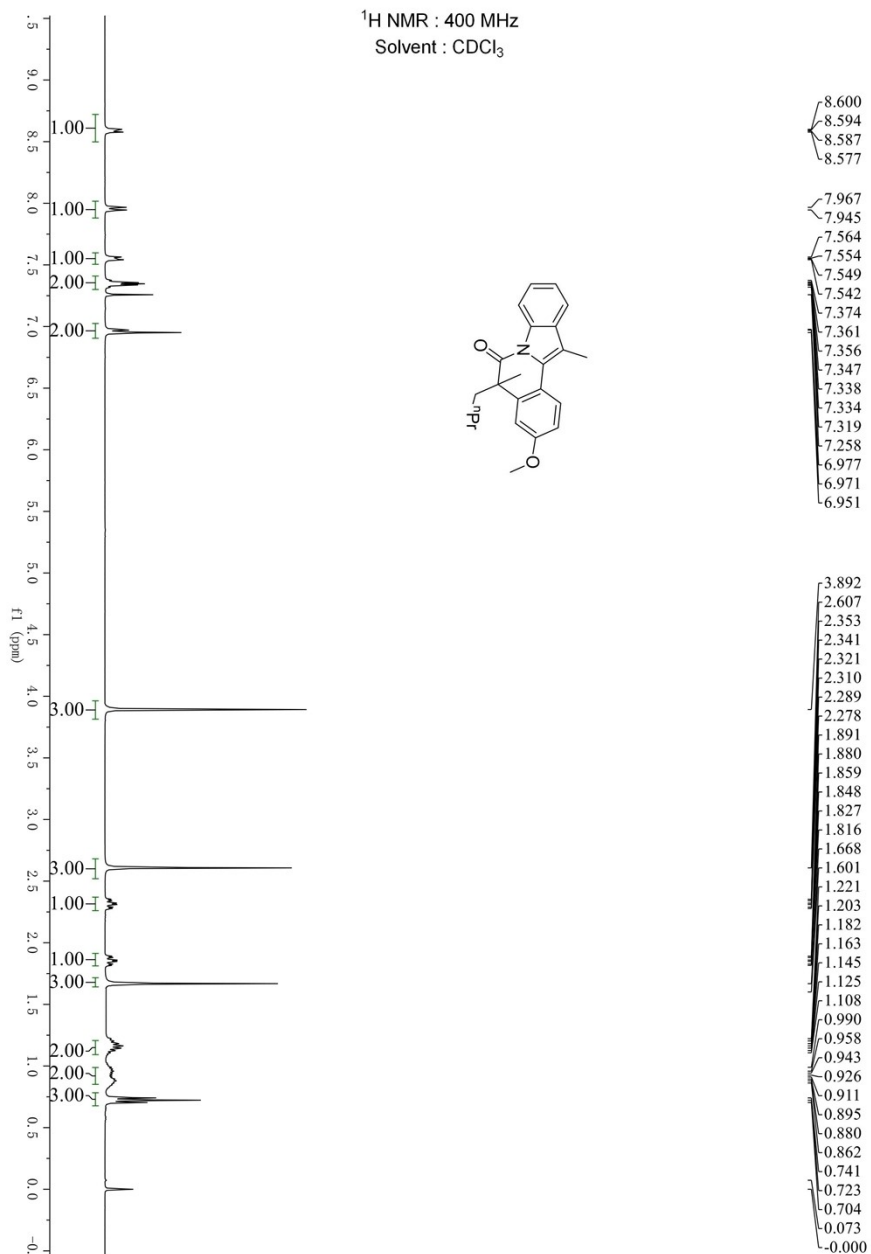

$^{13}\text{C}$   $\{^1\text{H}\}$  NMR : 100 MHz  
Solvent :  $\text{CDCl}_3$

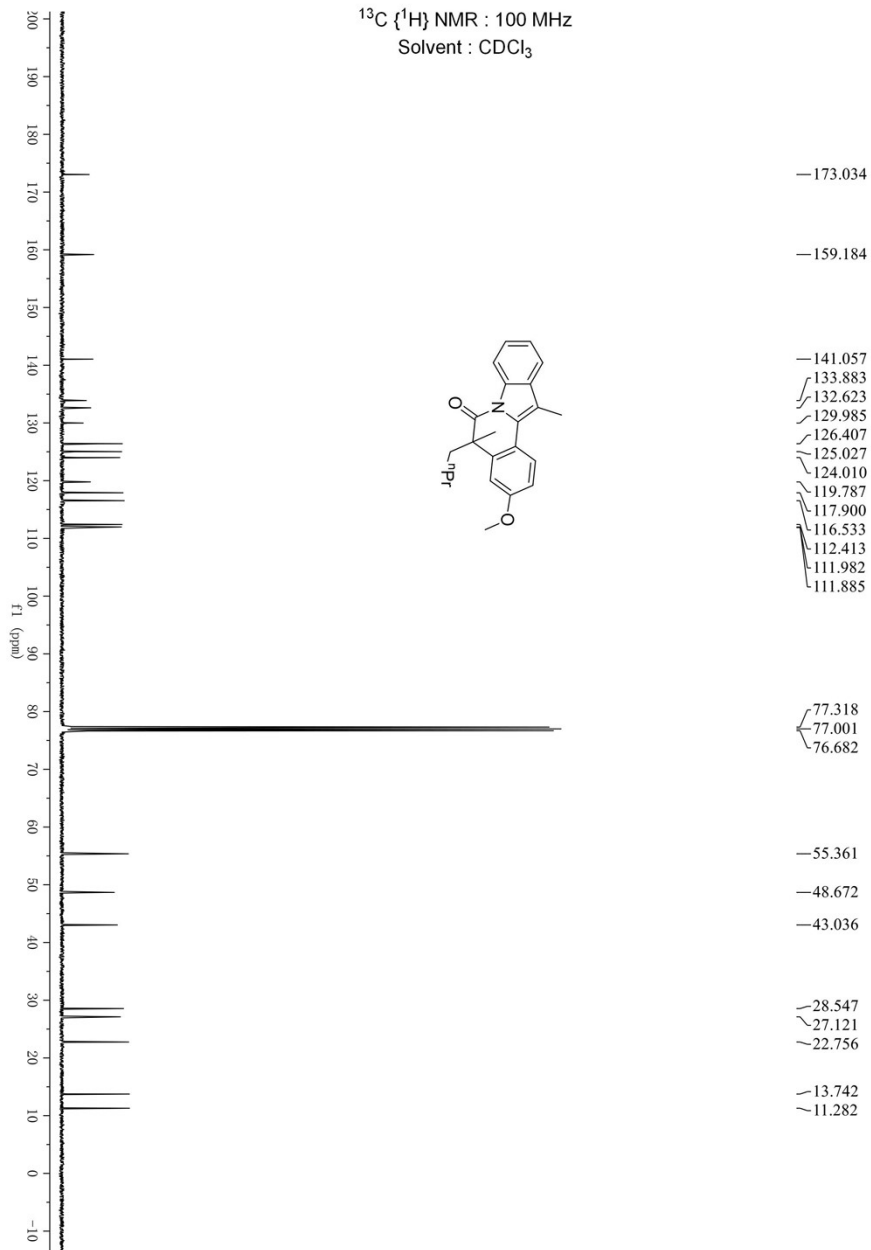



# 5-Isobutyl-

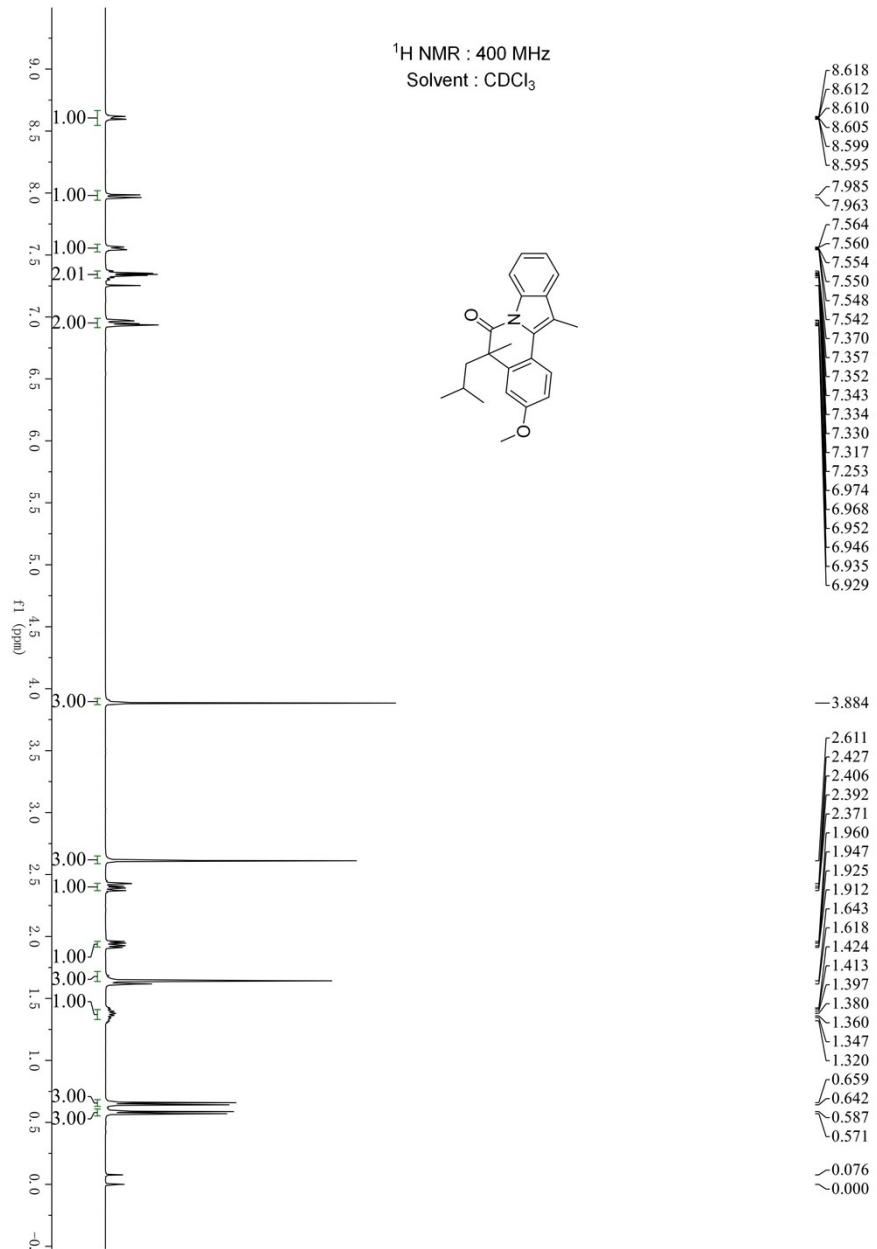

$^{13}\text{C}$   $\{^1\text{H}\}$  NMR : 100 MHz  
Solvent :  $\text{CDCl}_3$

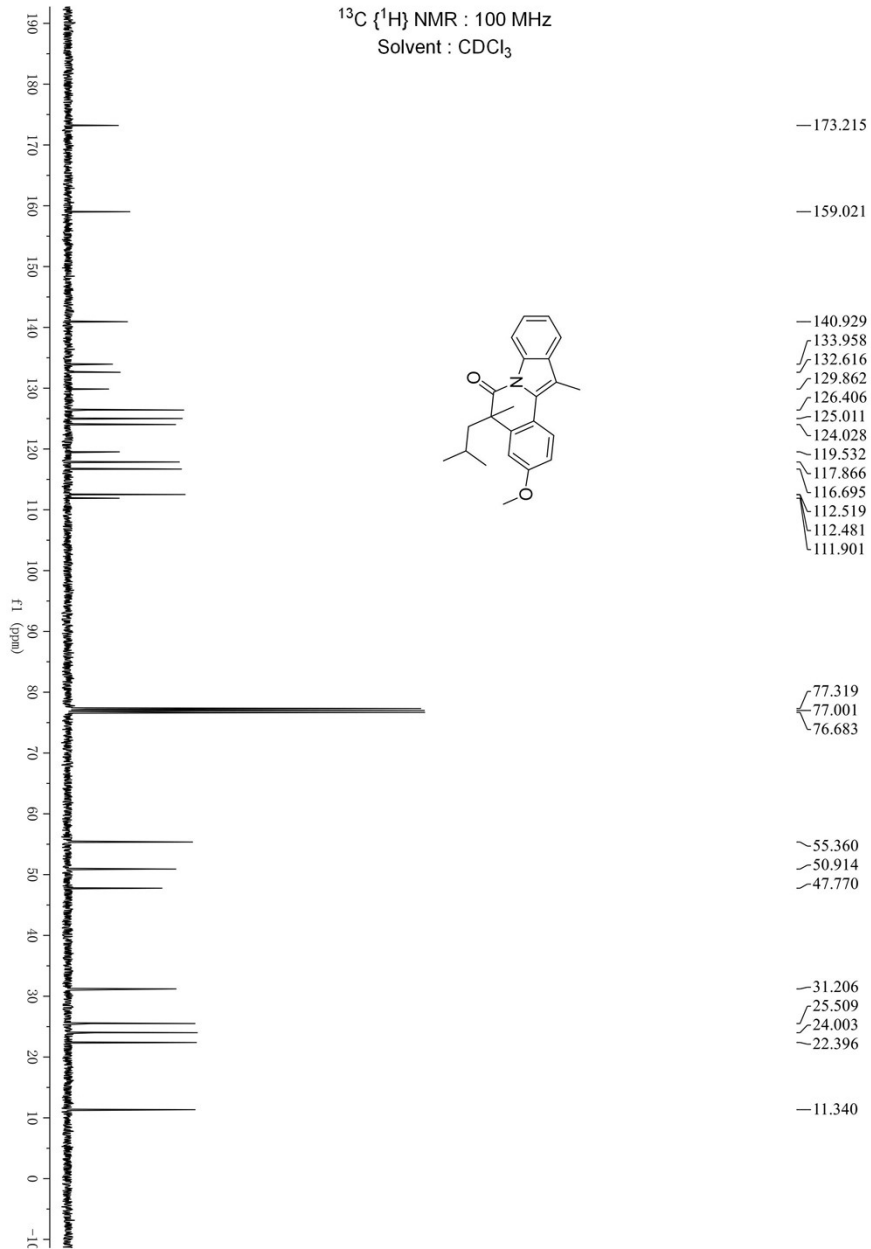

# 3-Methoxy

<sup>1</sup>H NMR : 400 MHz  
Solvent : CDCl<sub>3</sub>

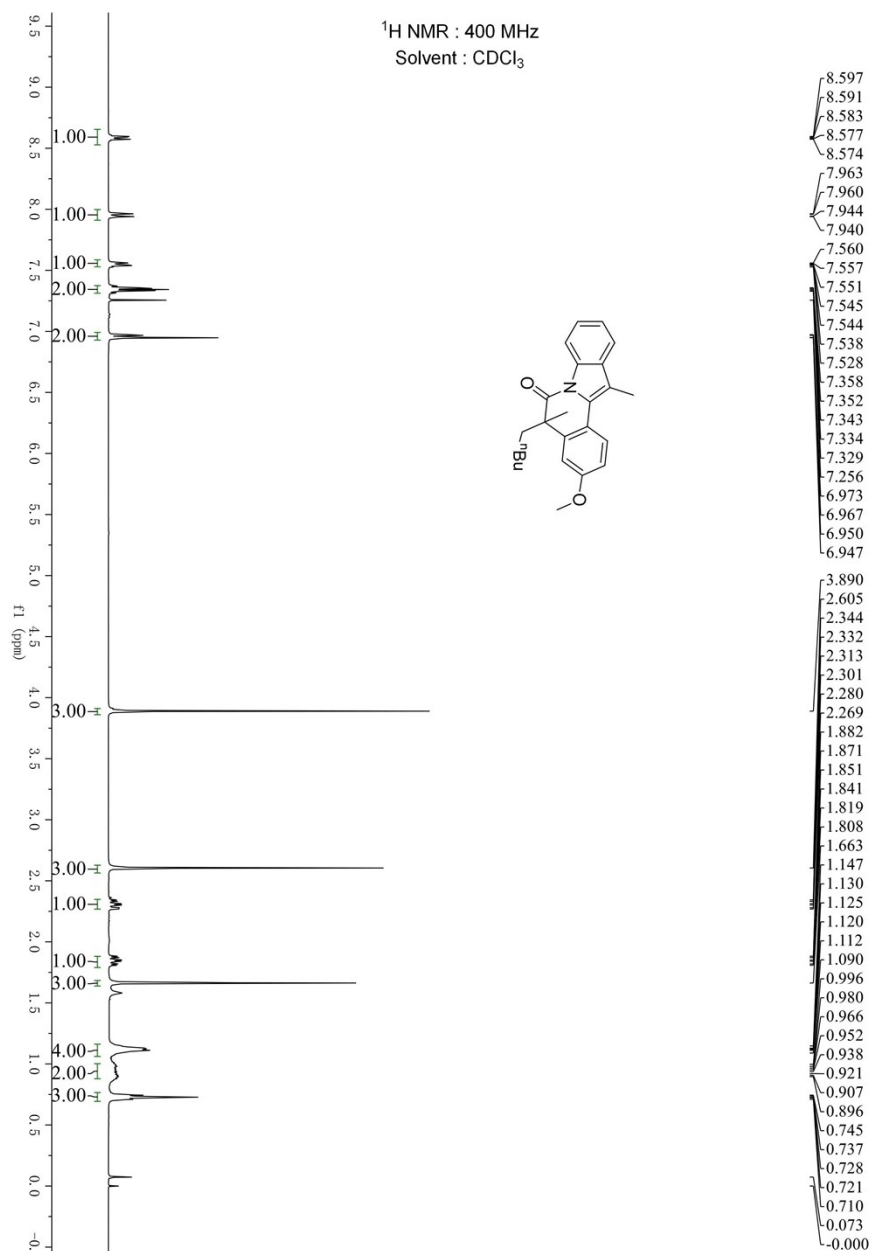

$^{13}\text{C}$   $\{^1\text{H}\}$  NMR : 100 MHz  
Solvent :  $\text{CDCl}_3$

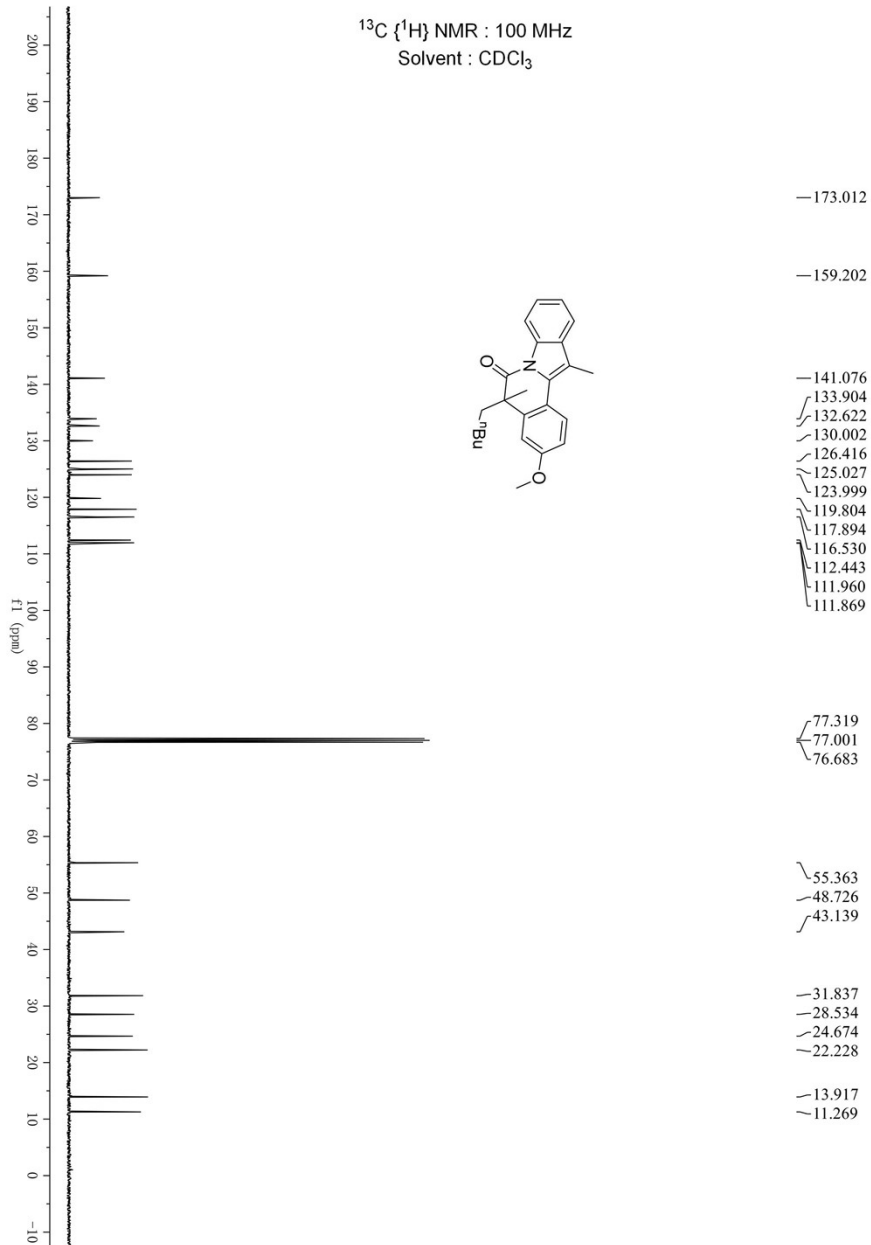

# 5-Hexyl-3

<sup>1</sup>H NMR : 400 MHz  
Solvent : CDCl<sub>3</sub>

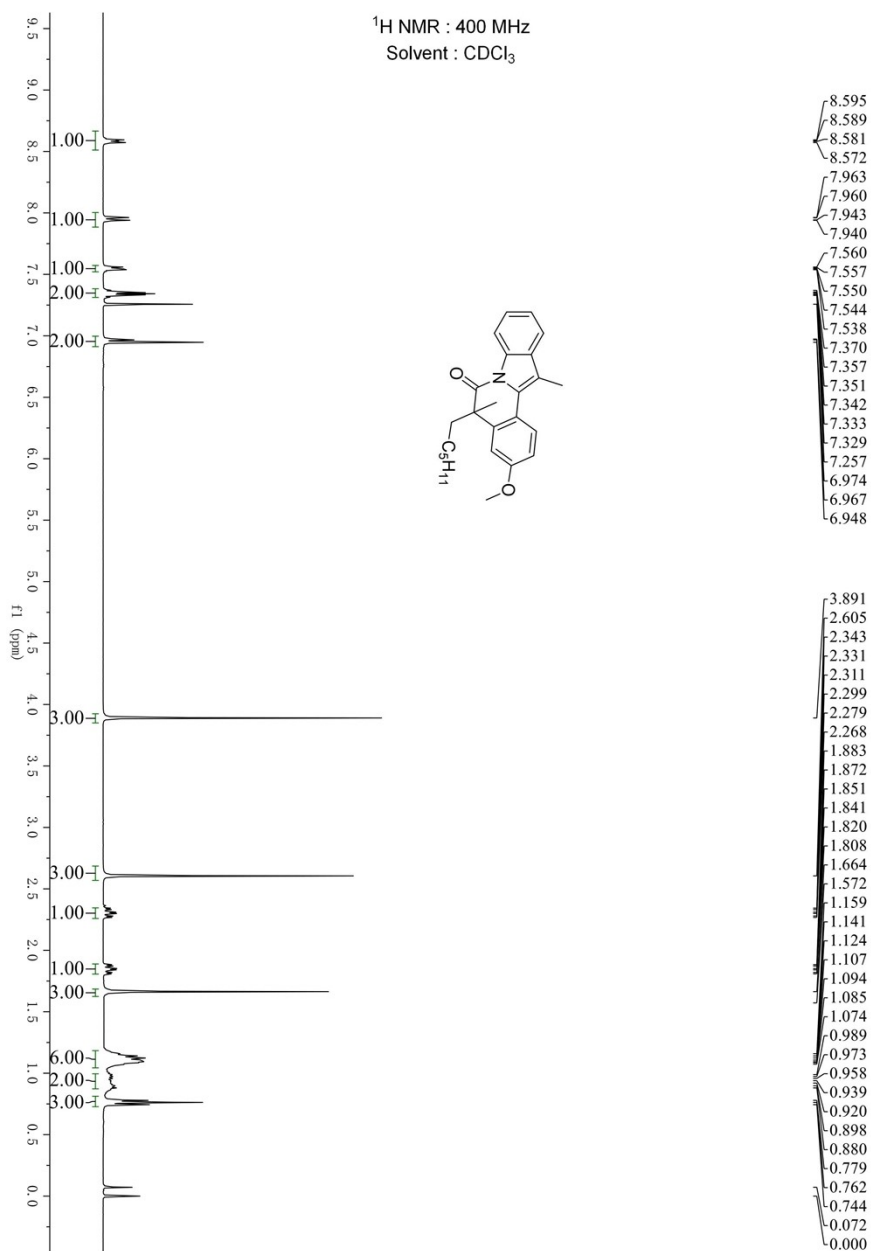

$^{13}\text{C}$  ( $^1\text{H}$ ) NMR : 100 MHz  
Solvent :  $\text{CDCl}_3$

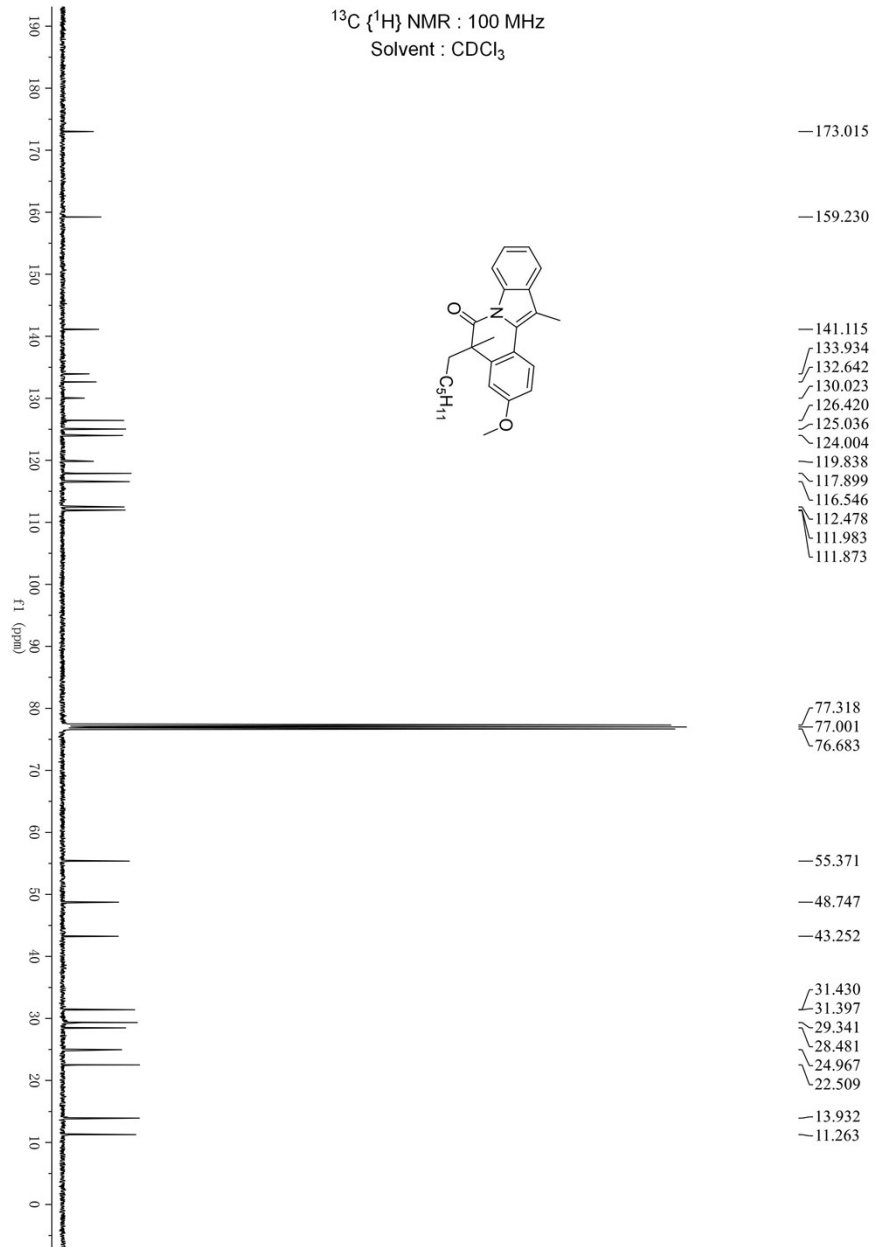

# 5-Heptyl-3

$^1\text{H}$  NMR : 400 MHz  
Solvent :  $\text{CDCl}_3$

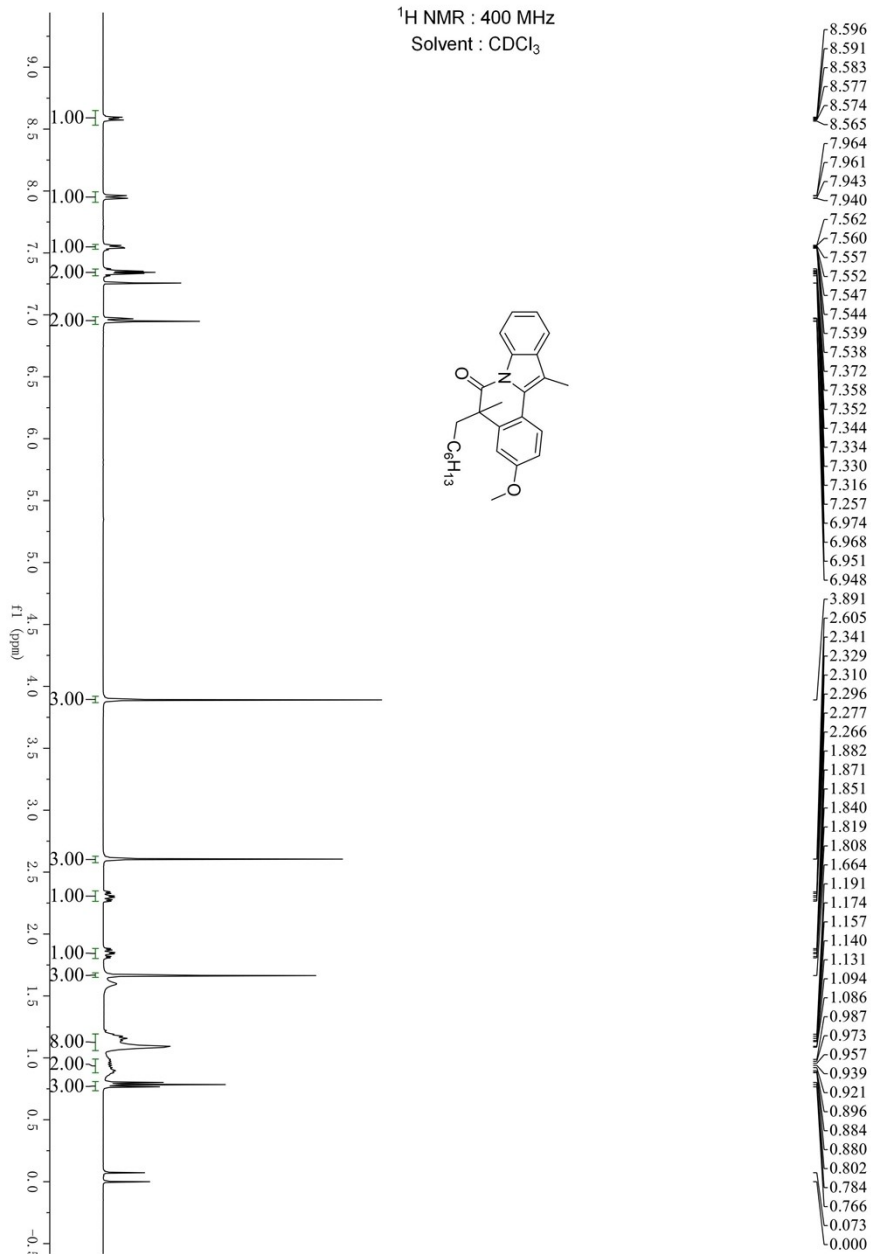

$^{13}\text{C}$   $\{^1\text{H}\}$  NMR : 100 MHz  
Solvent :  $\text{CDCl}_3$

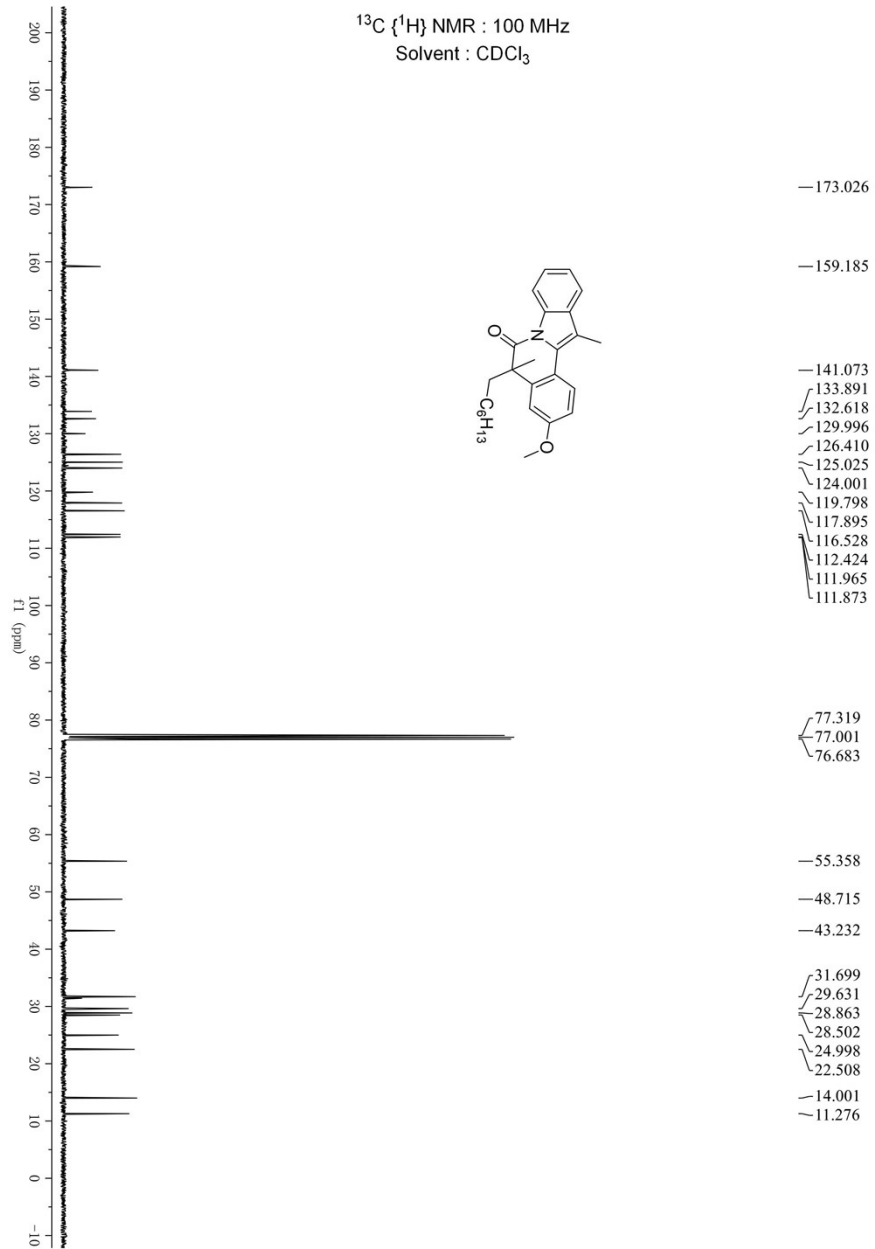



### 3-Methoxy-5

<sup>1</sup>H NMR : 400 MHz  
Solvent : CDCl<sub>3</sub>

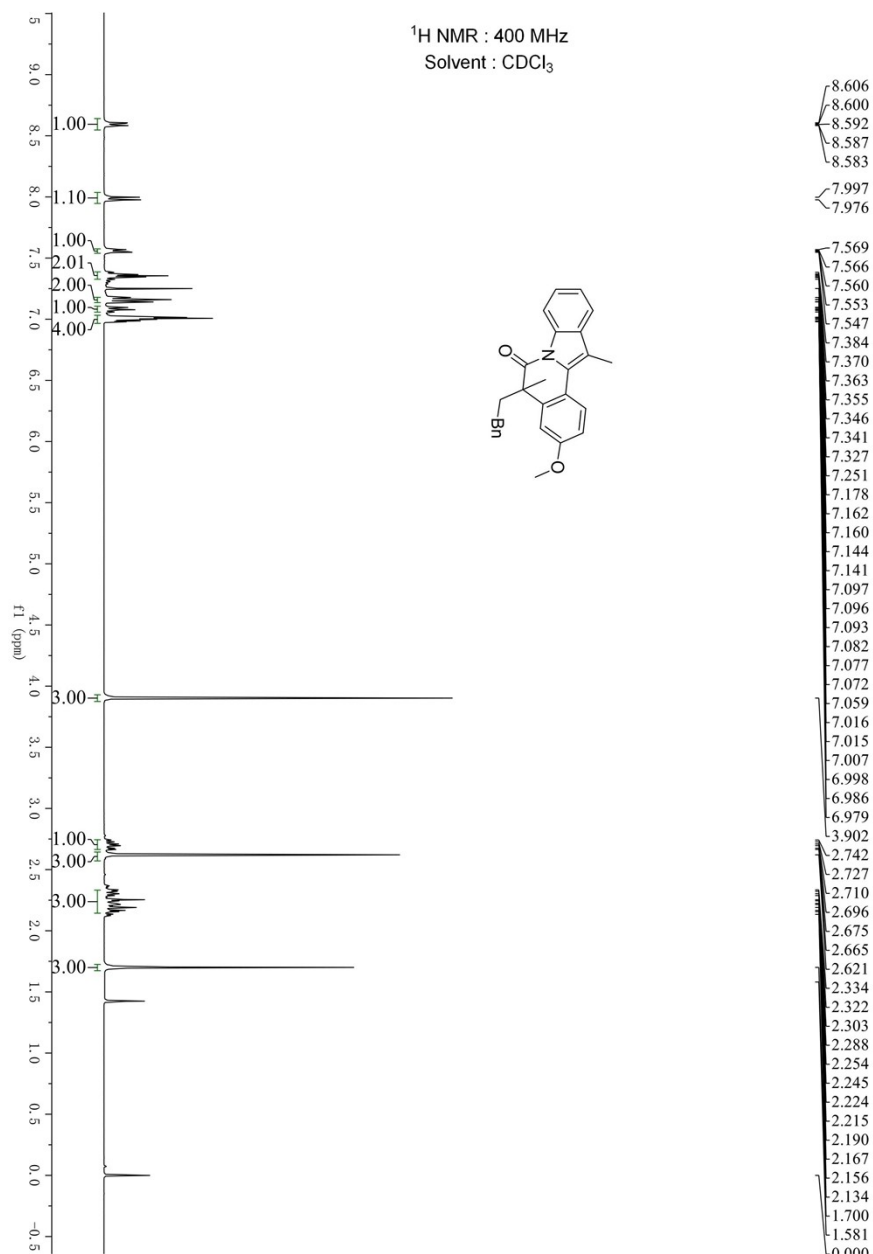

$^{13}\text{C}$   $\{^1\text{H}\}$  NMR : 100 MHz  
Solvent :  $\text{CDCl}_3$

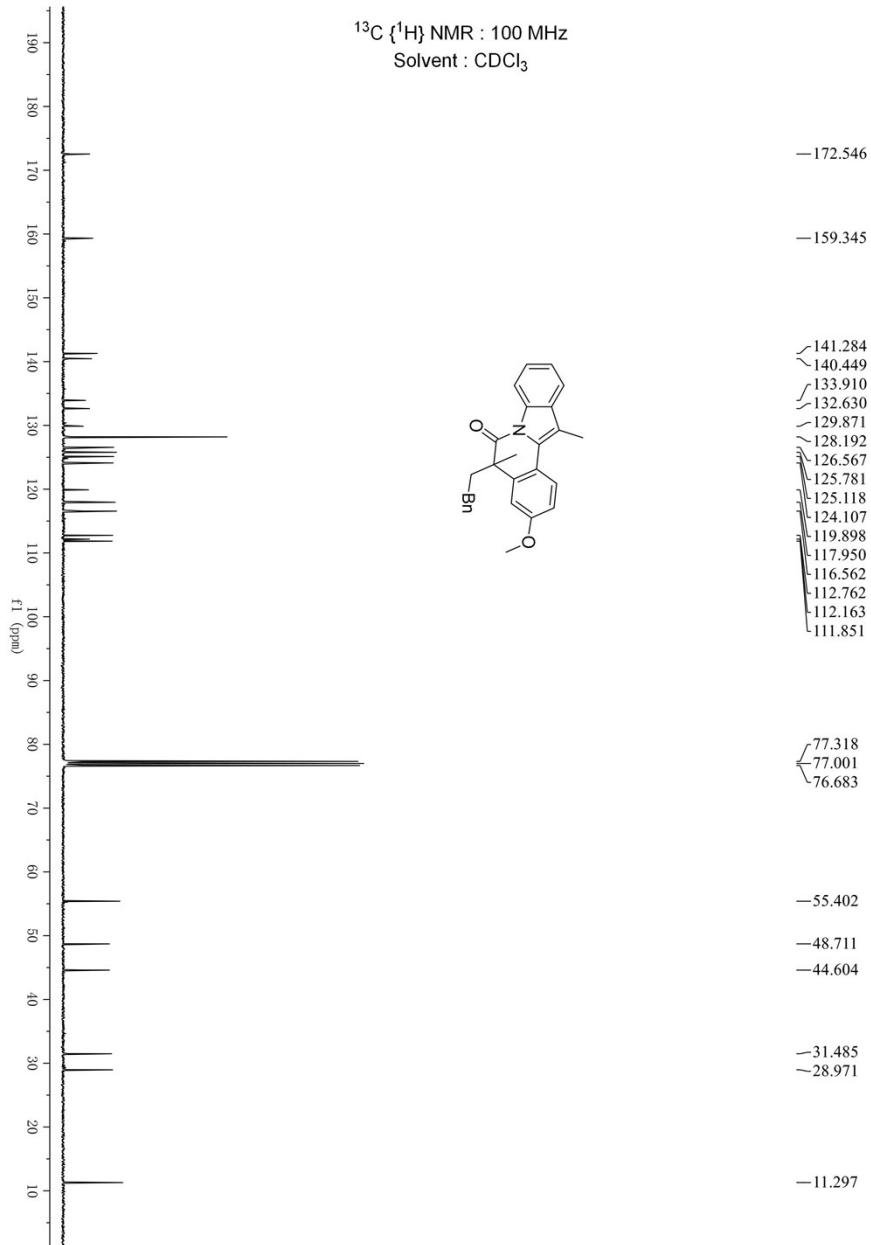

# 3-Methoxy-5

<sup>1</sup>H NMR : 400 MHz  
Solvent : CDCl<sub>3</sub>

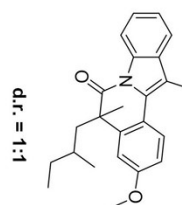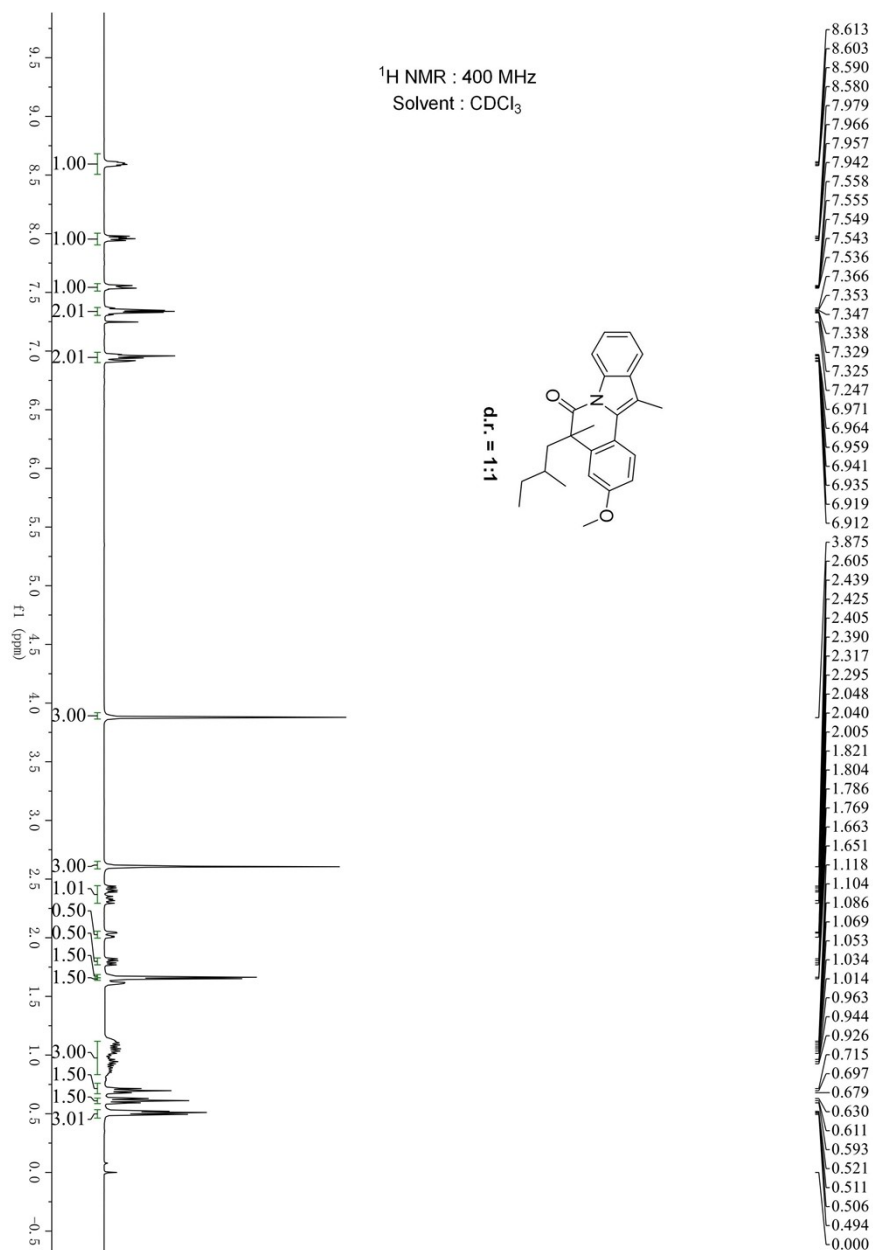

$^{13}\text{C}$   $\{^1\text{H}\}$  NMR : 100 MHz  
Solvent :  $\text{CDCl}_3$

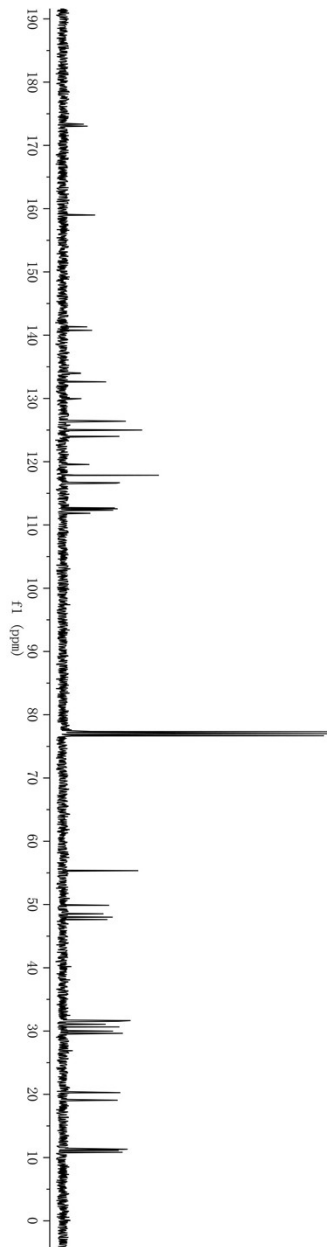

d.r. = 1:1

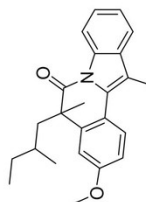

173.346  
173.040

159.067  
158.988

141.316  
140.773  
134.018  
133.951  
132.621  
129.976  
129.866  
126.408  
126.384  
125.003  
124.001  
123.975  
119.610  
119.554  
117.863  
116.680  
116.599  
112.700  
112.554  
112.513  
112.332  
111.873  
111.843  
77.319  
77.001  
76.683

55.354  
49.878  
48.527  
48.003  
47.628

31.655  
31.539  
31.072  
30.652  
29.981  
29.642  
20.263  
19.066  
11.321  
11.286  
11.112  
10.837

### 3-Methoxy-5

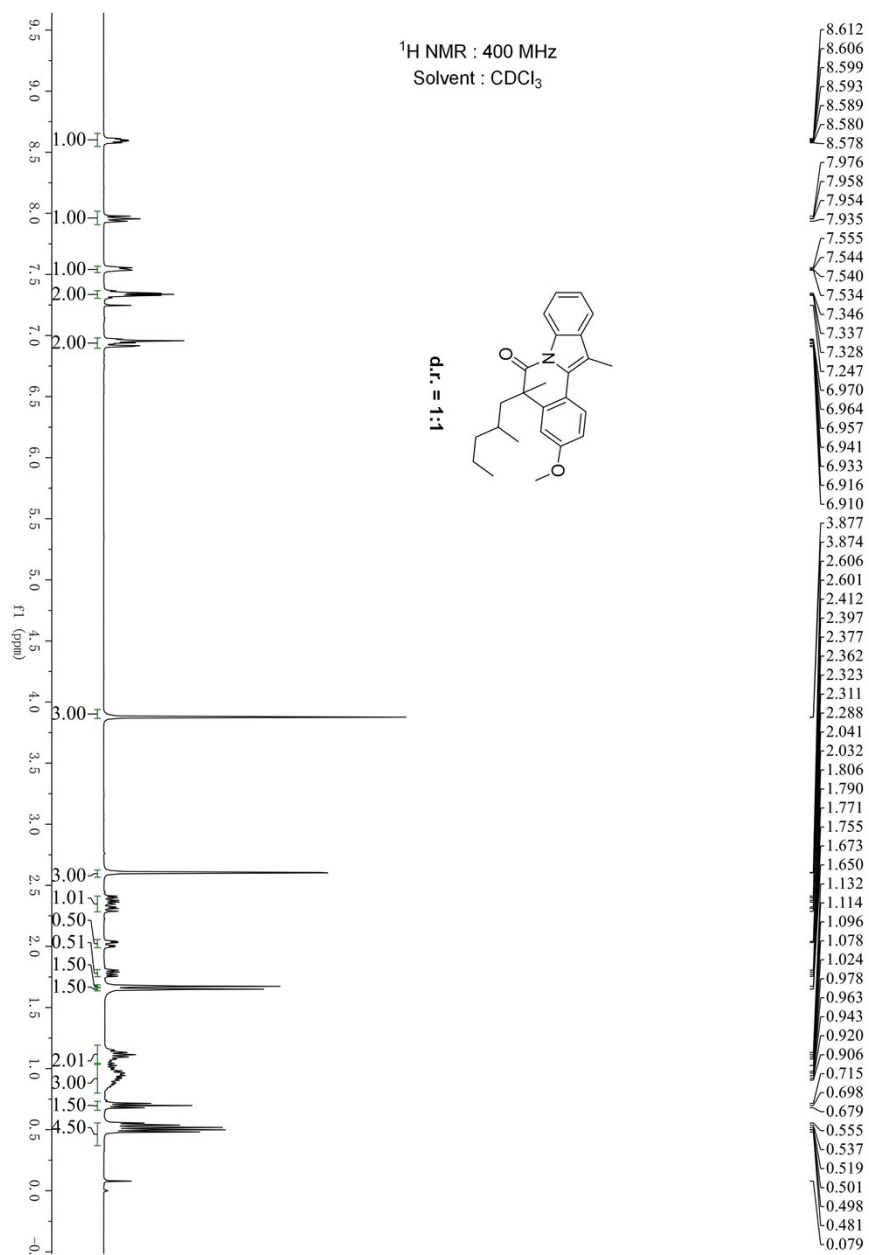

$^{13}\text{C}$  { $^1\text{H}$ } NMR : 100 MHz  
Solvent :  $\text{CDCl}_3$

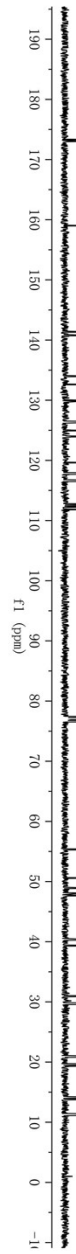

d.r. = 1:1

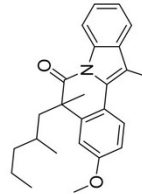

173.347  
173.061

159.065  
158.983

141.325  
140.759  
133.999  
133.942  
132.605  
129.977  
129.866  
126.371  
124.999  
123.994  
123.971  
119.607  
117.853  
116.671  
116.581  
112.748  
112.527  
112.494  
112.263  
111.861  
77.318  
77.001  
76.683

55.347  
50.600  
48.926  
47.996  
47.631  
40.368  
39.341  
30.989  
29.763  
29.669  
29.615  
20.863  
19.657  
19.623  
19.382  
14.082  
13.835  
11.315  
11.264

# 3-Methoxy-5

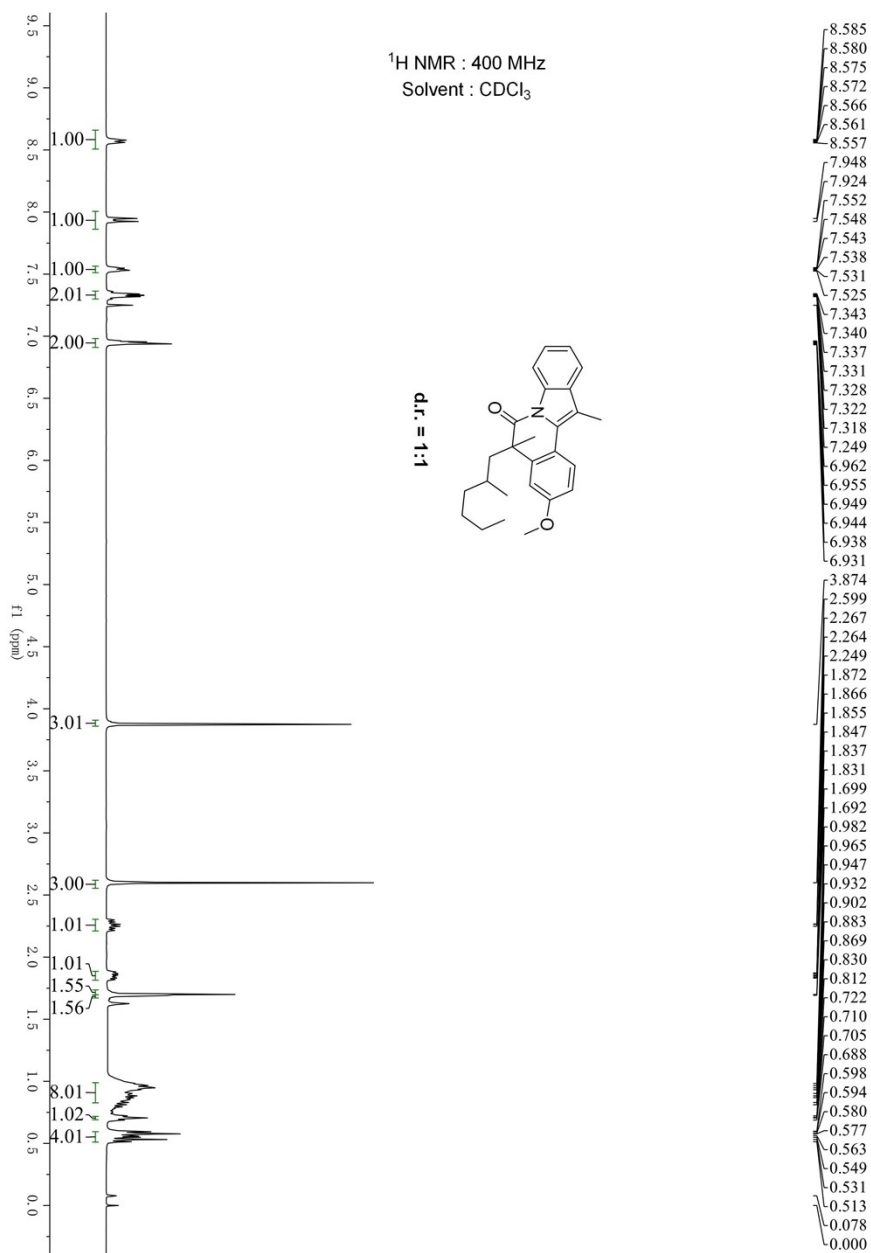

$^{13}\text{C}$   $\{^1\text{H}\}$  NMR : 100 MHz  
Solvent :  $\text{CDCl}_3$

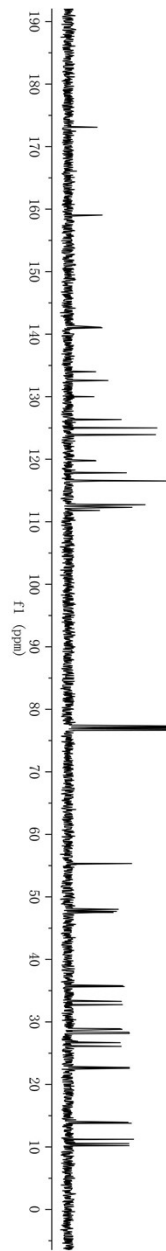

d.r. = 1:1

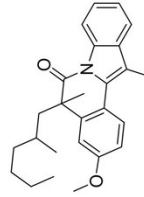

173.176  
173.097

159.050  
159.027

141.112  
141.025  
133.975  
132.590  
130.007  
126.352  
126.311  
124.999  
123.934  
119.806  
119.740  
117.853  
117.830  
116.519  
112.719  
112.307  
111.849  
111.814

77.318  
77.000  
76.683

55.340  
55.313

47.955  
35.800  
35.653  
33.293  
32.760  
28.925  
28.812  
28.359  
28.153  
26.681  
26.089  
22.722  
22.578  
13.949  
13.797  
11.233  
11.215  
10.543  
10.218



# 5-(2,6-Dimeth

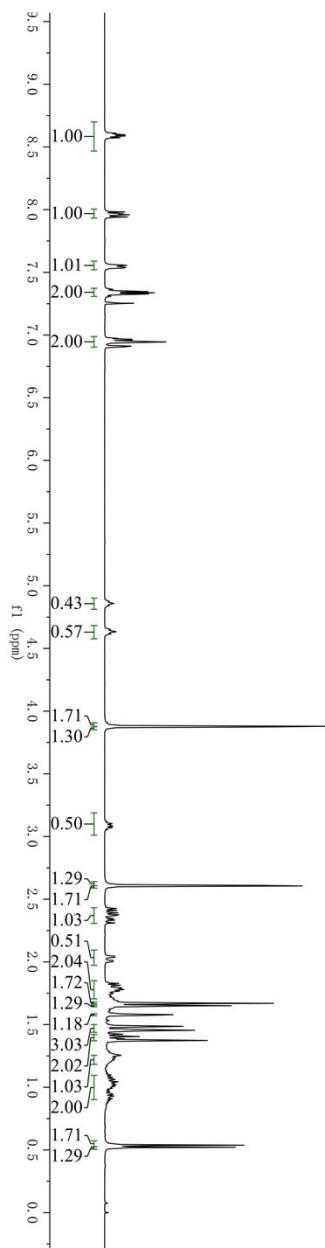

<sup>1</sup>H NMR : 400 MHz  
Solvent : CDCl<sub>3</sub>

d.r. = 1.33 : 1

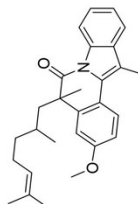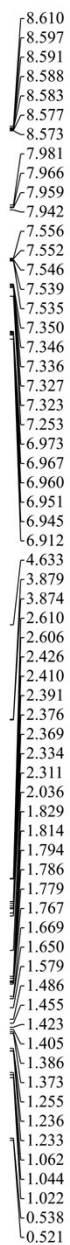

$^{13}\text{C} \{^1\text{H}\}$  NMR : 100 MHz  
Solvent :  $\text{CDCl}_3$

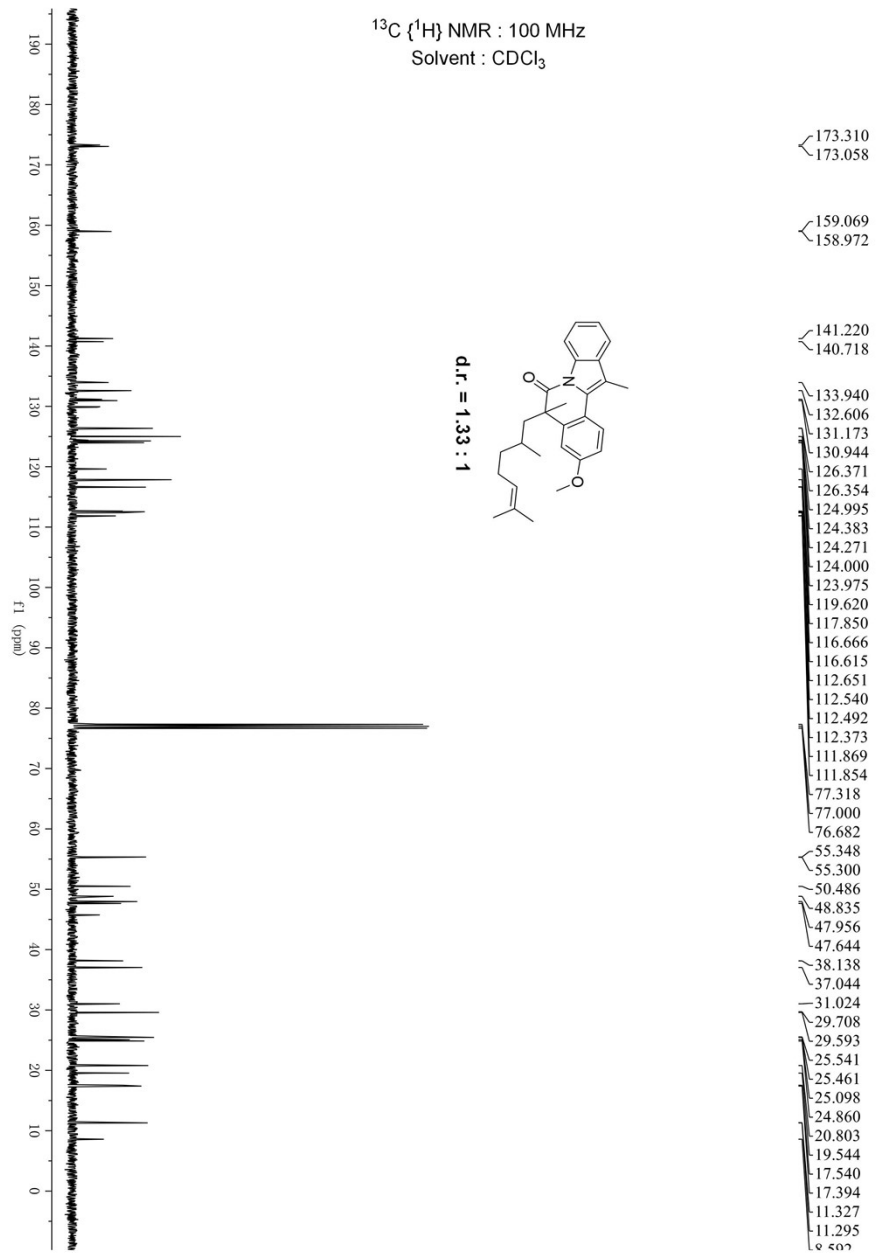

### 3-Methoxy-5-

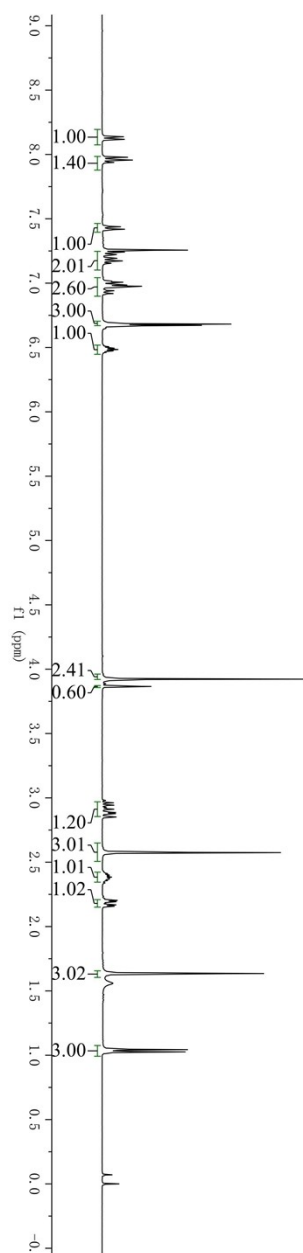

$^1\text{H NMR}$  : 400 MHz  
Solvent :  $\text{CDCl}_3$

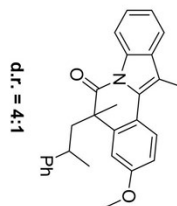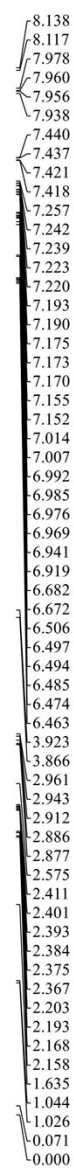

$^{13}\text{C} \{^1\text{H}\}$  NMR : 100 MHz  
Solvent :  $\text{CDCl}_3$

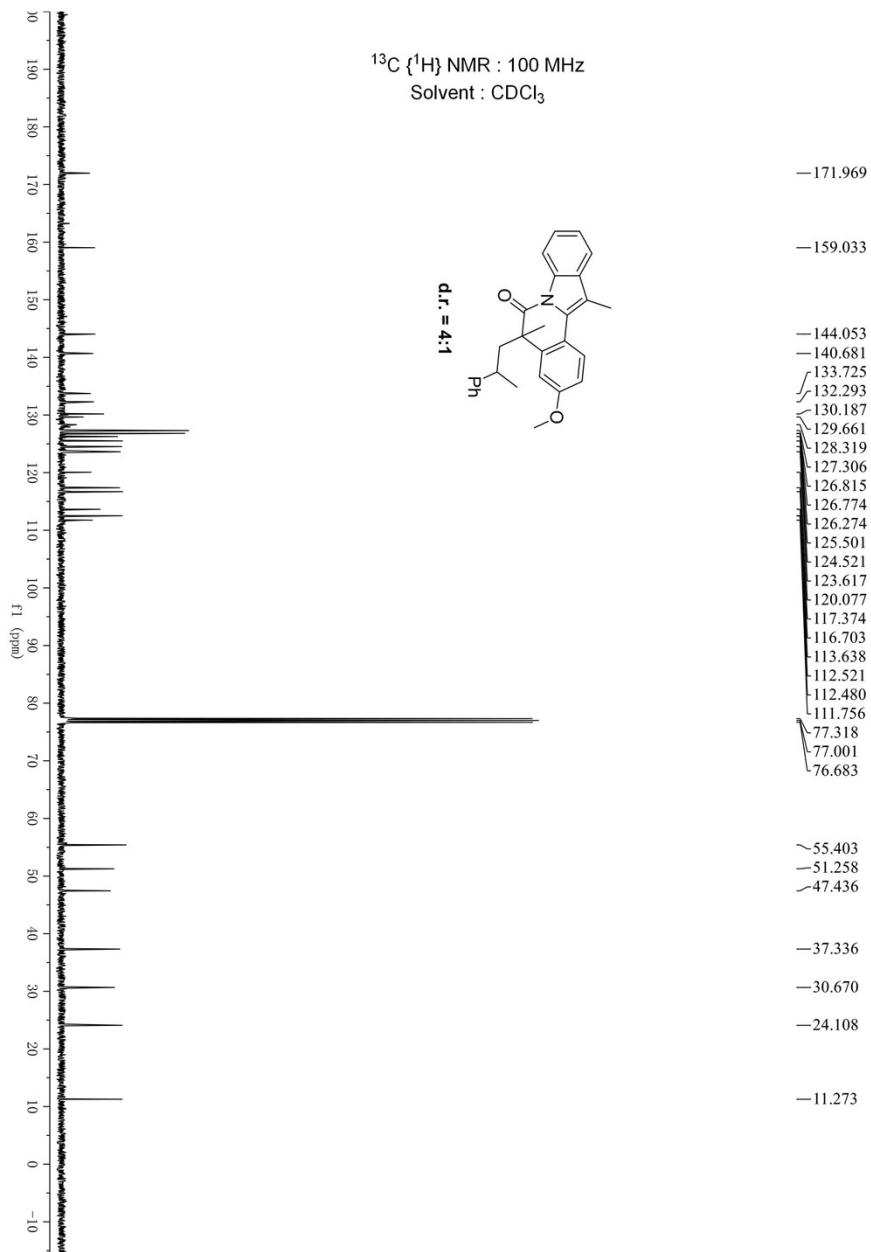

5-(3-(

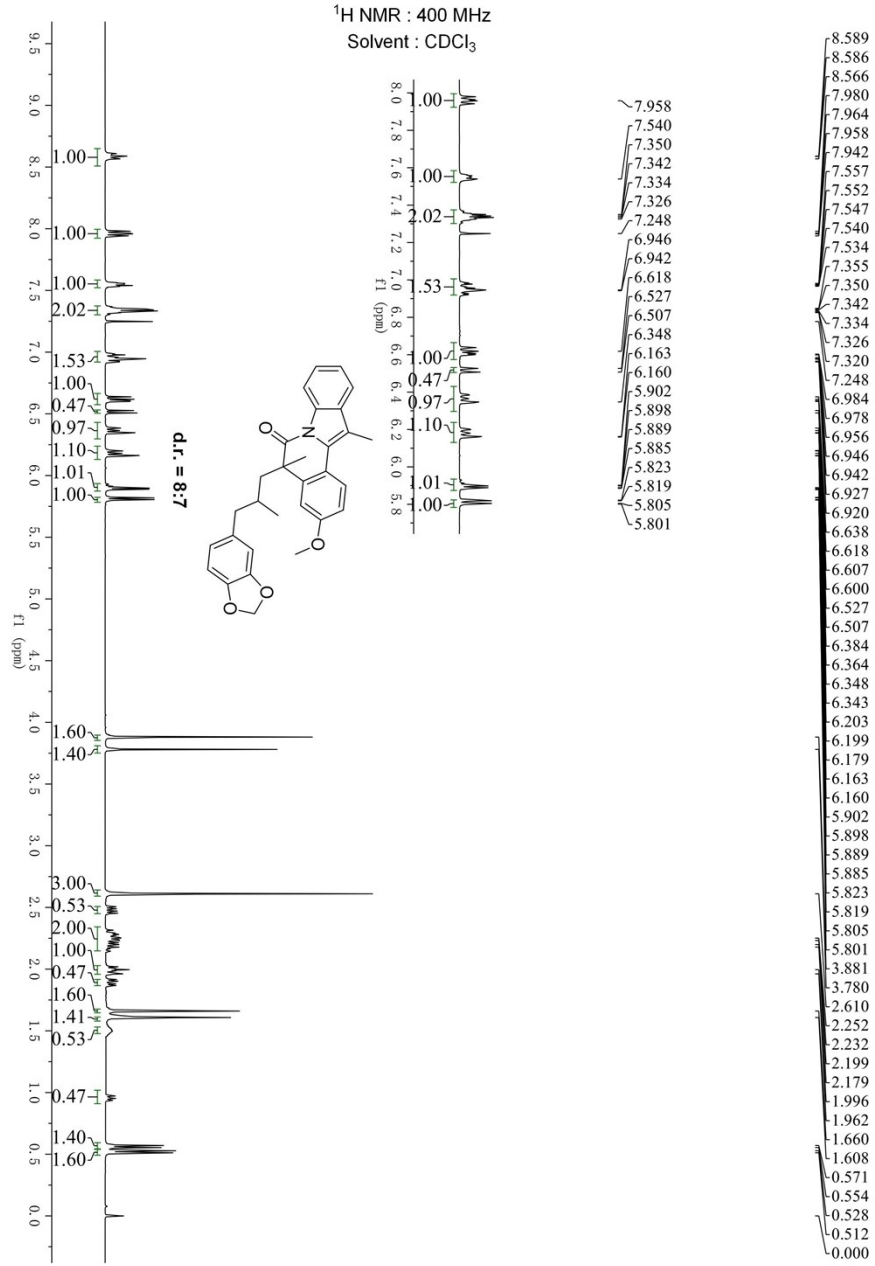

$^{13}\text{C} \{^1\text{H}\}$  NMR : 100 MHz  
Solvent :  $\text{CDCl}_3$

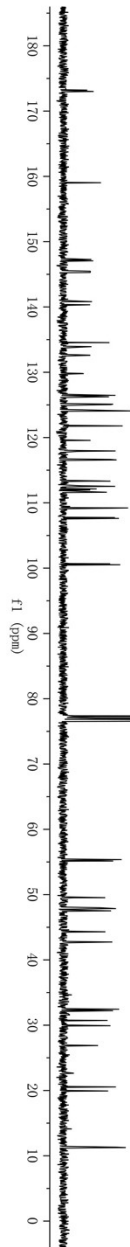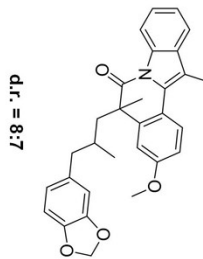

- 173.212
- 173.009
- 159.051
- 159.027
- 147.282
- 147.070
- 145.476
- 145.285
- 140.814
- 140.335
- 134.555
- 134.540
- 133.958
- 133.925
- 132.633
- 132.599
- 126.468
- 126.241
- 125.119
- 125.049
- 124.074
- 121.826
- 121.778
- 119.569
- 119.493
- 117.947
- 117.892
- 116.658
- 116.573
- 113.326
- 112.611
- 112.527
- 112.136
- 111.973
- 111.627
- 109.217
- 109.177
- 107.748
- 107.618
- 100.672
- 100.520
- 77.317
- 77.000
- 76.683
- 55.362
- 55.141
- 49.532
- 47.994
- 47.857
- 47.521
- 44.302
- 42.743
- 32.451
- 32.218
- 30.728
- 29.923
- 26.881
- 20.544
- 19.926
- 11.325
- 11.260

# 5-(2-Ethylh

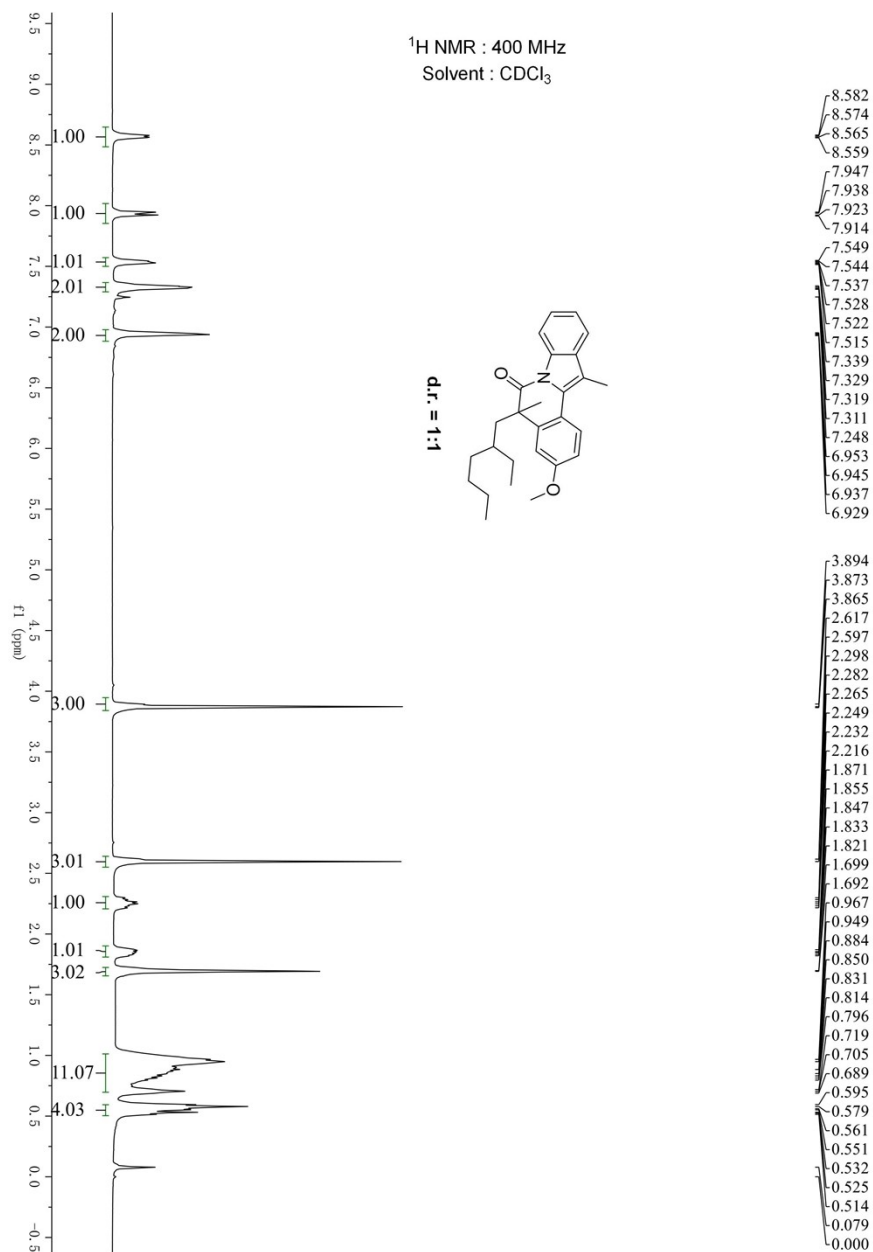

$^{13}\text{C}$   $\{^1\text{H}\}$  NMR : 100 MHz  
Solvent :  $\text{CDCl}_3$

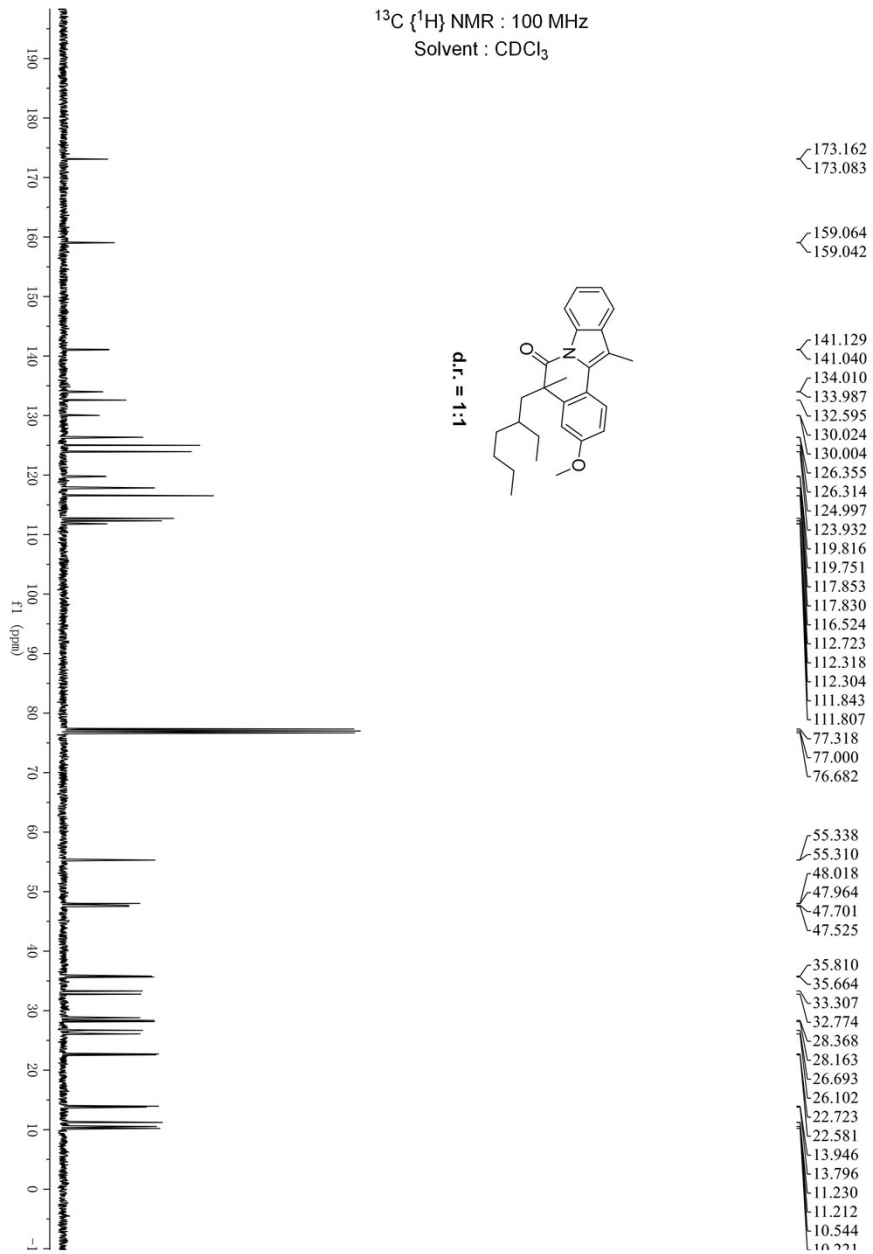



$^1\text{H}$  NMR : 400 MHz  
Solvent :  $\text{CDCl}_3$

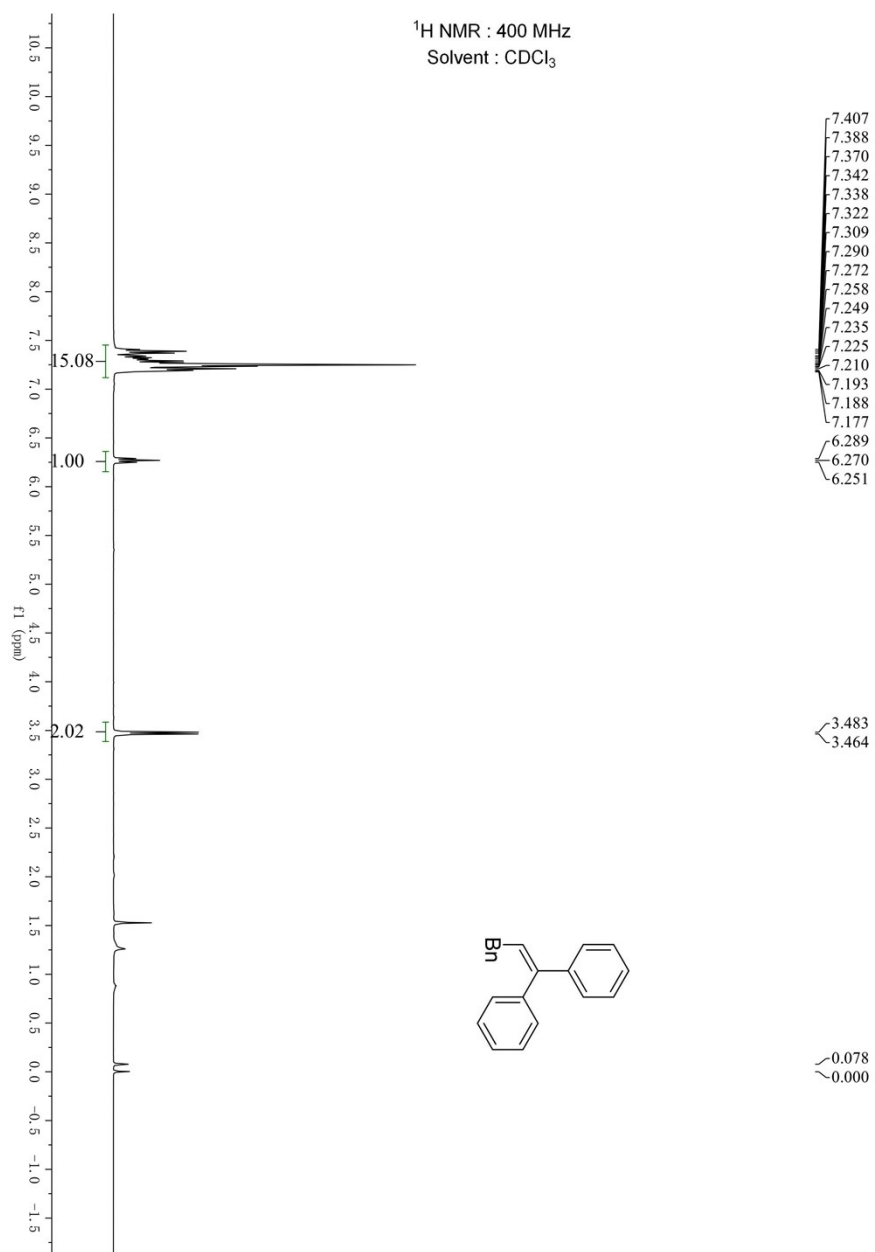

$^{13}\text{C}$  { $^1\text{H}$ } NMR : 100 MHz  
Solvent :  $\text{CDCl}_3$

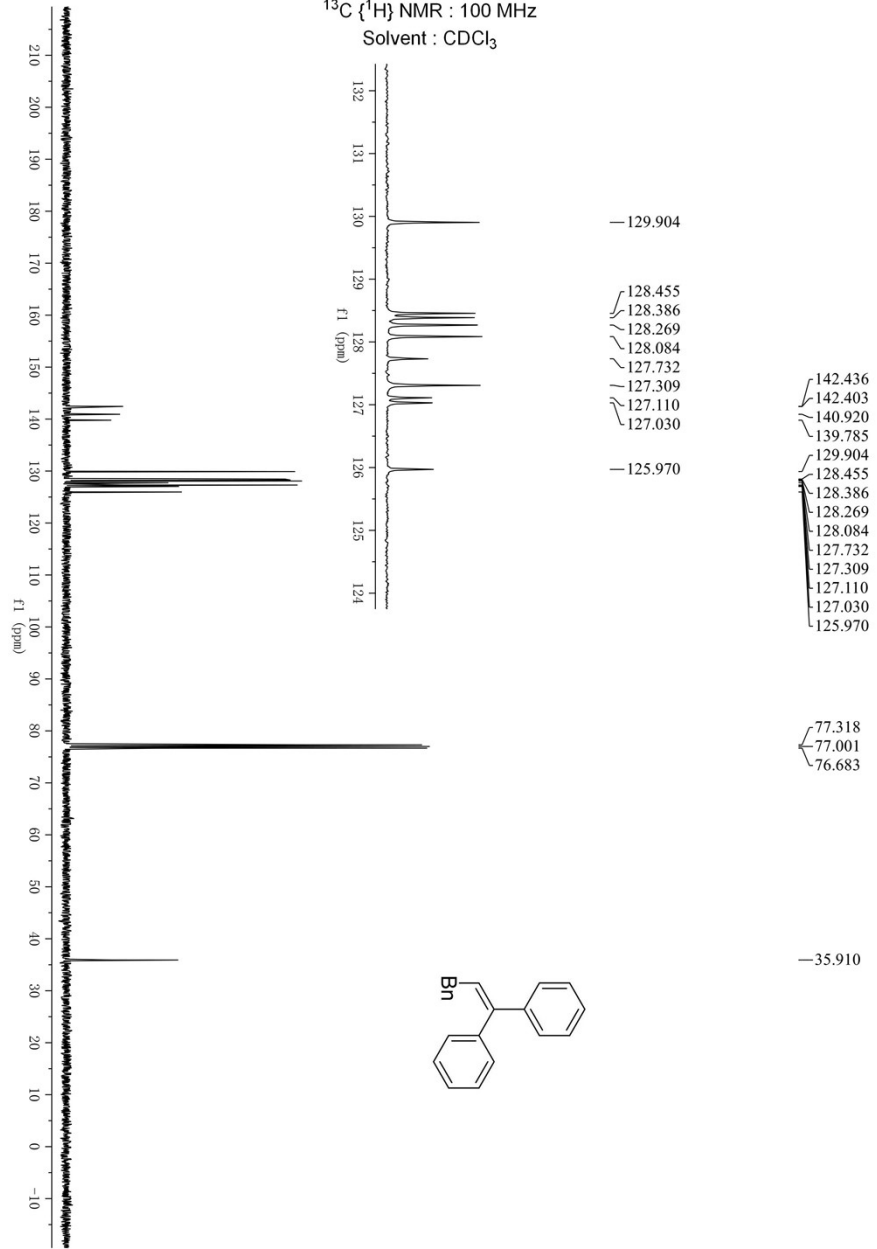

Supplement: d2ob01732f1.pdf [file d2ob01732f1.pdf]
